# Supplementary material for: Improved photocatalytic hydrogen evolution driven by chloro(terpyridine)platinum(ii) derivatives tethered to a single pendant viologen acceptor
Source: Royal Society of Chemistry journal article supplement (doi:10.1039/c6dt01456a), 2016-01-01
Supplement: c6dt01456a1.pdf [file c6dt01456a1.pdf]

## Supporting Information

### Improved Photocatalytic Hydrogen Evolution Driven by Chloro(terpyridine)platinum(II) Derivatives Tethered to a Single Pendant Viologen Acceptor

Shu Lin<sup>a,b</sup>, Kyoji Kitamoto<sup>a,b</sup>, Hironobu Ozawa<sup>\*c</sup>, and Ken Sakai<sup>\*a,b,d</sup>

<sup>a</sup>Department of Chemistry, Faculty of Science, Kyushu University, Motooka 744, Nishi-ku, Fukuoka, 819-0395, Japan

<sup>b</sup>International Institute for Carbon-Neutral Energy Research (WPI-I2CNER), Kyushu University, Motooka 744, Nishi-ku, Fukuoka, 819-0395, Japan

<sup>c</sup>Education Center for Global Leaders in Molecular Systems for Devices, Kyushu University, 774 Motooka, Nishi-ku, Fukuoka, 819-0395, Japan

<sup>d</sup>Center for Molecular System (CMS), Kyushu University, Motooka 744, Nishi-ku, Fukuoka 819-0395, Japan

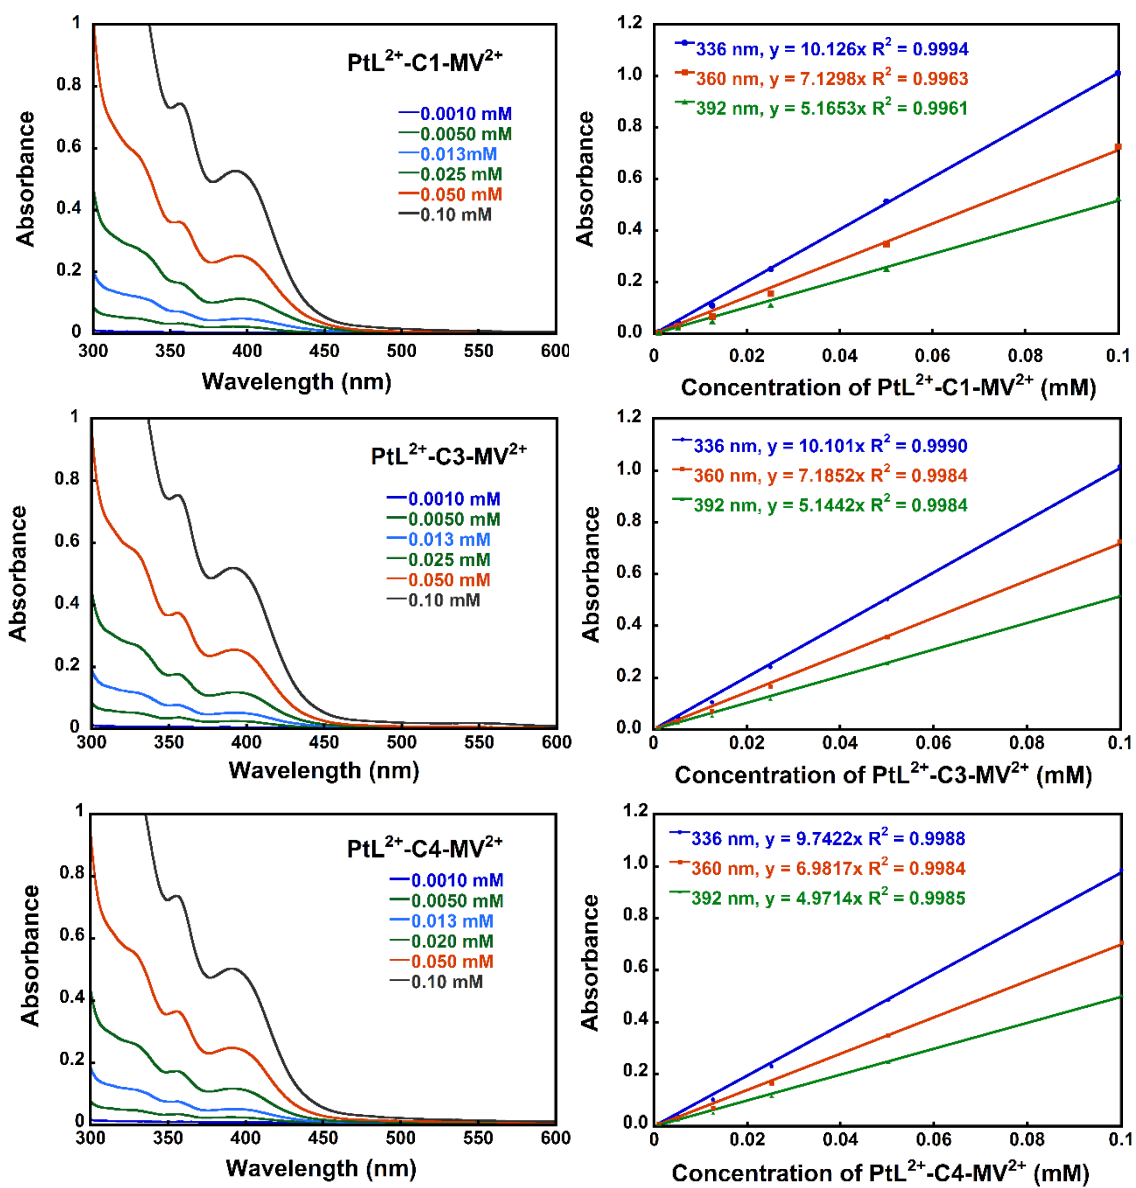

**Figure S1.** Absorption spectra of various concentration of  $\text{PtL}^{2+}\text{-C}_n\text{-MV}^{2+}$  in the 0.1 M NaCl aqueous solution at 20 °C in Air (left), and the concentration dependence of the absorbance at 336, 360 and 392 nm under the concentration range between 0.001 and 0.1 mM.

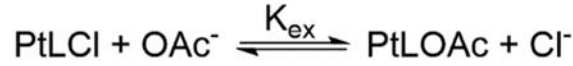

$$K_{ex} = \frac{[\text{PtLOAc}][\text{Cl}^-]}{[\text{PtLCl}][\text{OAc}^-]}, [\text{OAc}^-] \gg [\text{Pt}]_{total} \text{ \& } [\text{Cl}^-] \gg [\text{Pt}]_{total}$$

$$[\text{PtLOAc}] = \frac{K_{ex} [\text{PtLCl}][\text{OAc}^-]}{[\text{Cl}^-]}$$

$$C_0 = [\text{Pt}]_{total} = [\text{PtLCl}] + [\text{PtLOAc}]$$

$$C_0 = \frac{[\text{PtLCl}]}{[\text{Cl}^-]} ([\text{Cl}^-] + K_{ex} [\text{OAc}^-])$$

$$ABS_{obs} = [\text{PtLCl}] \varepsilon_{\text{PtLCl}} + [\text{PtLOAc}] \varepsilon_{\text{PtLOAc}}$$

$$= [\text{PtLCl}] \varepsilon_{\text{PtLCl}} + \left[ \frac{K_{ex} [\text{PtLCl}][\text{OAc}^-]}{[\text{Cl}^-]} \right] \varepsilon_{\text{PtLOAc}}$$

$$= [\text{PtLCl}] \left[ \frac{\varepsilon_{\text{PtLCl}} [\text{Cl}^-] + K_{ex} [\text{OAc}^-] \varepsilon_{\text{PtLOAc}}}{[\text{Cl}^-]} \right]$$

$$= \frac{[\text{PtLCl}]}{[\text{Cl}^-]} (\varepsilon_{\text{PtLCl}} [\text{Cl}^-] + \varepsilon_{\text{PtLOAc}} K_{ex} [\text{OAc}^-])$$

$$ABS_{obs.} = C_0 \frac{(\varepsilon_{\text{PtLCl}} \times [\text{Cl}^-] + \varepsilon_{\text{PtLOAc}} \times K_{ex} [\text{OAc}^-])}{([\text{Cl}^-] + K_{ex} [\text{OAc}^-])} \quad \text{eqn. S1}$$

**Table S1.** Relative abundance of **PtLCl** species in acetate buffer solution (0.1 M, pH = 5) containing 0.05 mM **PtL<sup>2+</sup>-Cn-MV<sup>2+</sup>** and 0.1 M NaCl.

| Compound                                   | Fitting wavelength (nm) | $K_{ex}$ | $R^2$  | Relative abundance of <b>PtLCl</b> species |
|--------------------------------------------|-------------------------|----------|--------|--------------------------------------------|
| <b>PtL<sup>2+</sup>-C1-MV<sup>2+</sup></b> | 355                     | 0.09498  | 0.9926 | 93.8%                                      |
|                                            | 392                     | 0.06362  | 0.9972 | 95.7%                                      |
| <b>PtL<sup>2+</sup>-C3-MV<sup>2+</sup></b> | 355                     | 0.13054  | 0.9922 | 91.6%                                      |
|                                            | 392                     | 0.06333  | 0.9965 | 95.8%                                      |
| <b>PtL<sup>2+</sup>-C4-MV<sup>2+</sup></b> | 355                     | 0.09333  | 0.9898 | 93.9%                                      |
|                                            | 392                     | 0.08245  | 0.9966 | 94.5%                                      |

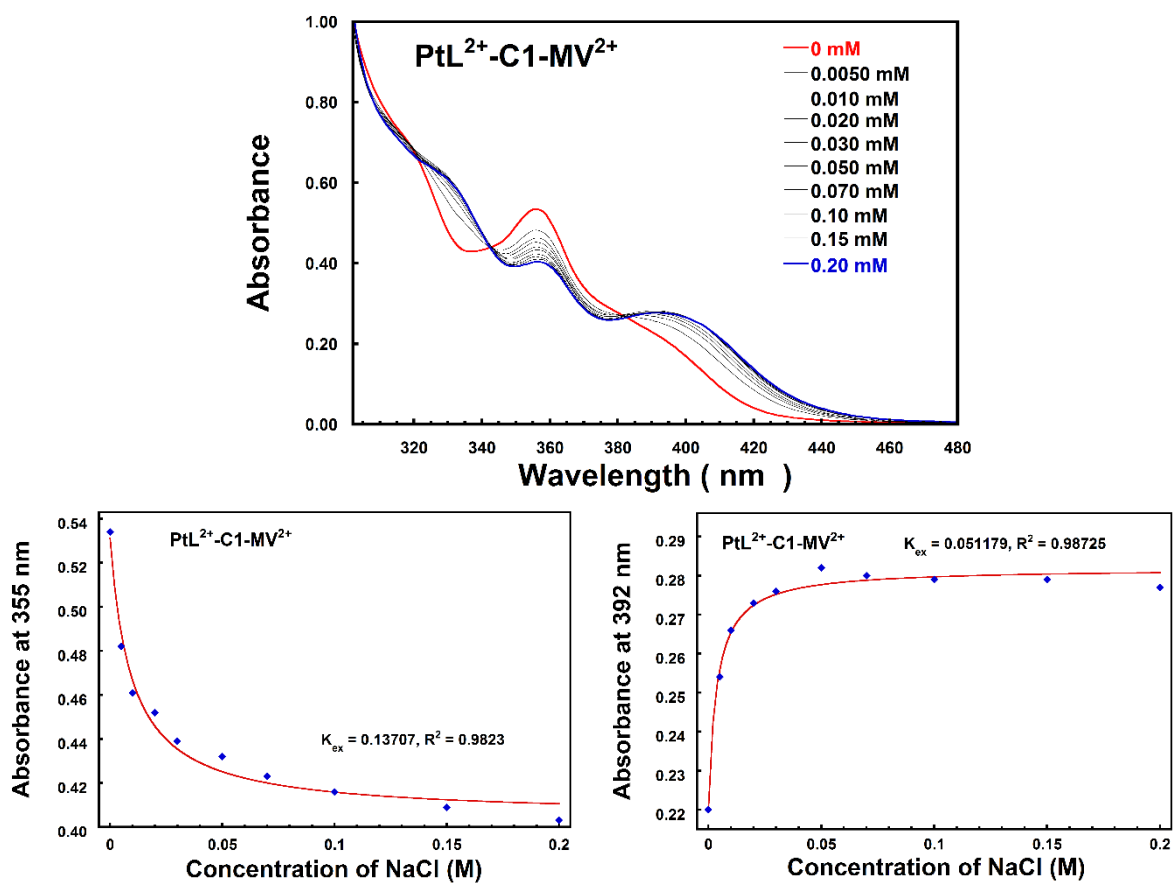

**Figure S2.** Absorption spectra of  $\text{PtL}^{2+}\text{-C1-MV}^{2+}$  in an aqueous acetate buffer solution (0.1 M, pH = 5.0) in the presence of various concentration of NaCl at 20 °C in Air.

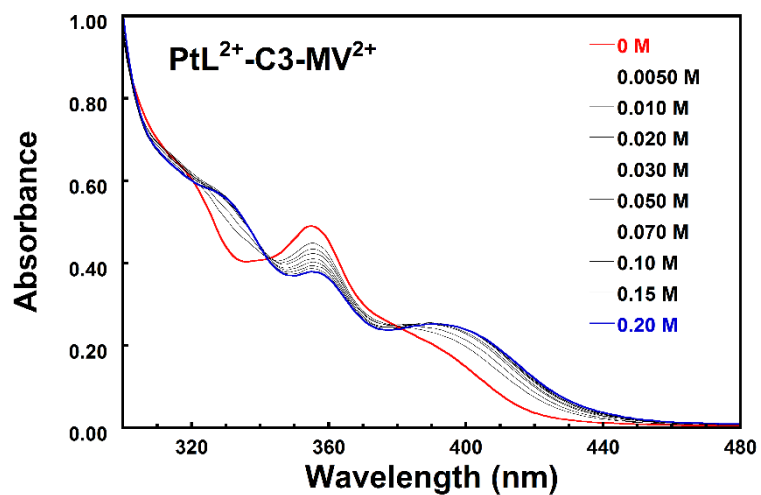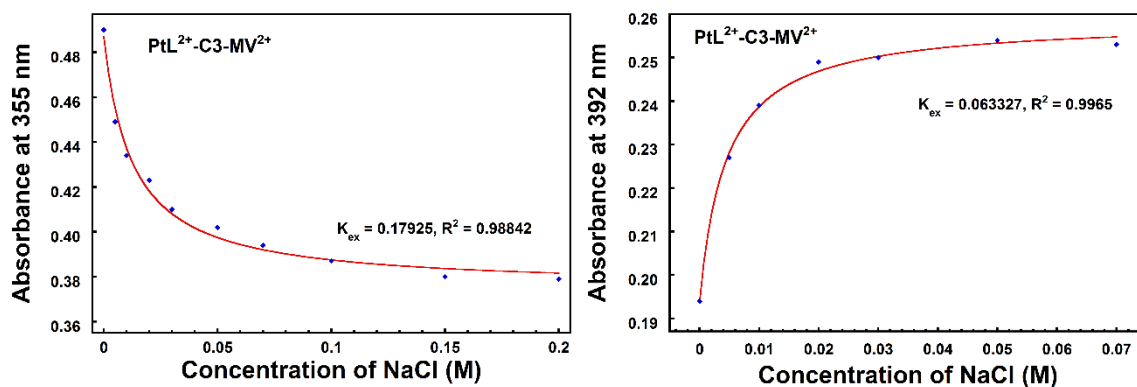

**Figure S3.** Absorption spectra of  $\text{PtL}^{2+}\text{-C3-MV}^{2+}$  in an aqueous acetate buffer solution (0.1 M, pH = 5.0) in the presence of various concentration of NaCl at 20 °C in Air.

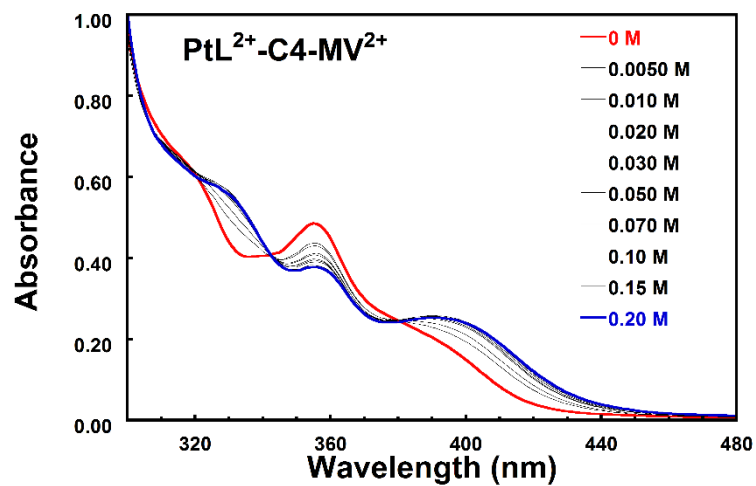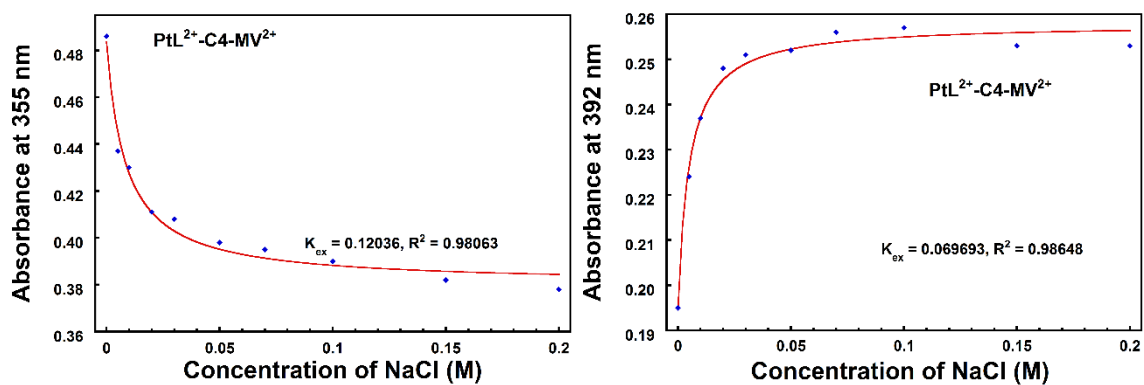

**Figure S4.** Absorption spectra of  $\text{PtL}^{2+}\text{-C4-MV}^{2+}$  in an aqueous acetate buffer solution (0.1 M, pH = 5.0) in the presence of various concentration of NaCl at 20 °C in Air.

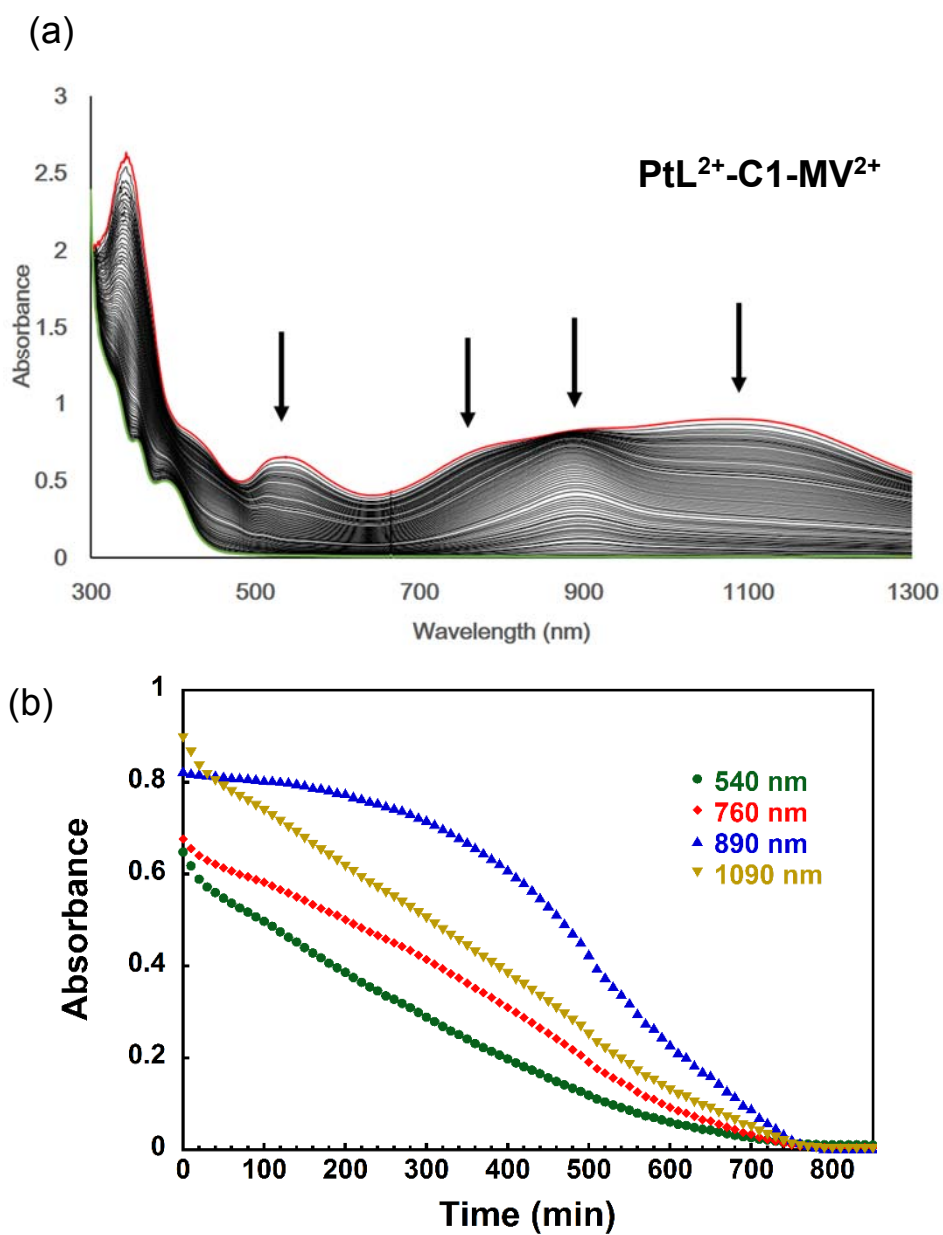

**Figure S5.** Spectral changes of the 90-min-irradiated aqueous acetate buffer solution containing 30 mM EDTA, 0.05 mM  $\text{PtL}^{2+}\text{-C1-MV}^{2+}$ , and 0.1 M NaCl under Ar atmosphere in the dark (a). Time course of the absorbance changes at 540, 760, 890, and 1090 nm (b).

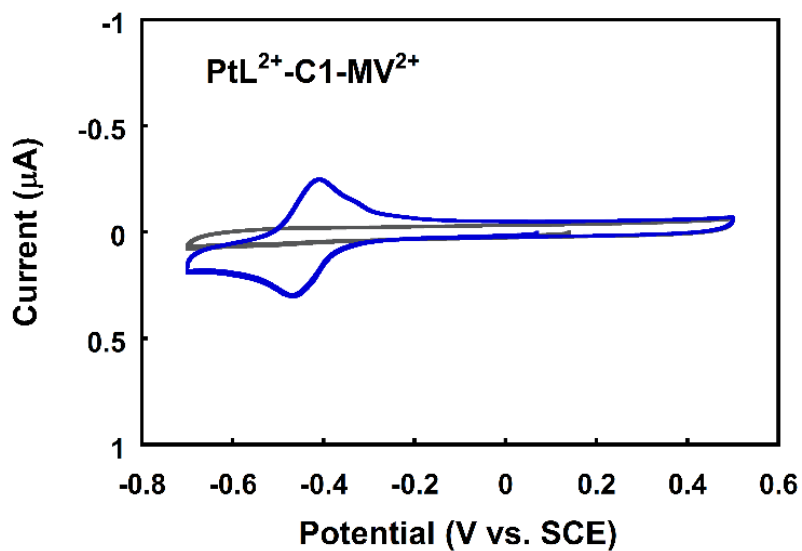

**Figure S6.** Cyclic voltammogram of 0.1 mM  $\text{PtL}^{2+}\text{-C1-MV}^{2+}$  in an aqueous acetate buffer solution (0.1 M, pH = 5.0) containing 30 mM EDTA and 0.1 M NaCl at 20 °C under Ar atmosphere. Potentials are given vs. SCE. Experiments were carried out using a glassy carbon working electrode, a Pt wire counter electrode, and a SCE reference electrode at the sweep rate of 50 mV/s.



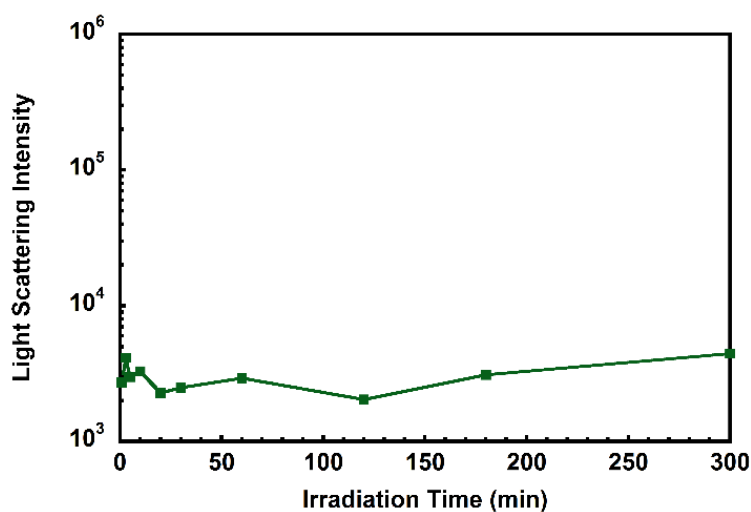

**Figure S7.** Changes of the light-scattering intensity of the aqueous acetate buffer solution (0.1 M, pH = 5.0) containing 30 mM EDTA, 0.05 mM  $\text{PtL}^{2+}$ -C1-MV<sup>2+</sup>, and 0.1 M NaCl. Photolysis experiment was carried out under Ar atmosphere at 20 °C.

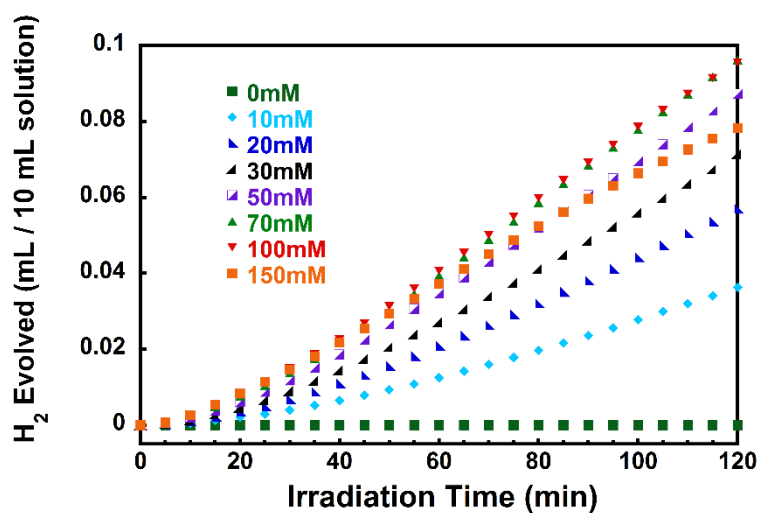

**Figure S8.** The H<sub>2</sub> production curves from an aqueous acetate buffer solution (10 mL, 0.1 M, pH = 5.0, at 20 °C under Ar atmosphere) containing 0.05 mM  $\text{PtL}^{2+}$ -C1-MV<sup>2+</sup>, 0.1 M NaCl, and various concentration of EDTA (The raw data of Figure 8a in MS).

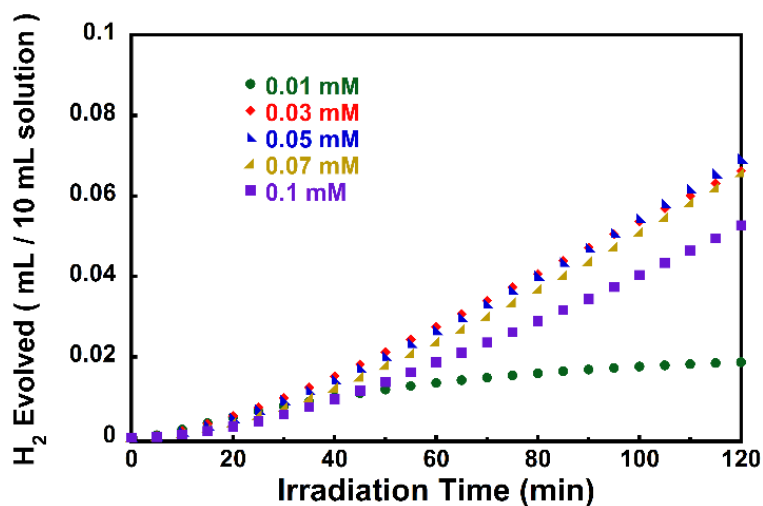

**Figure S9.** The H<sub>2</sub> production curves from an aqueous acetate buffer solution (10 mL, 0.1 M, pH = 5.0, at 20 °C under Ar atmosphere) containing 30 mM EDTA, 0.1 M NaCl, and various concentration of PtL<sup>2+</sup>-C1-MV<sup>2+</sup> (The raw data of Figure 8b in MS).

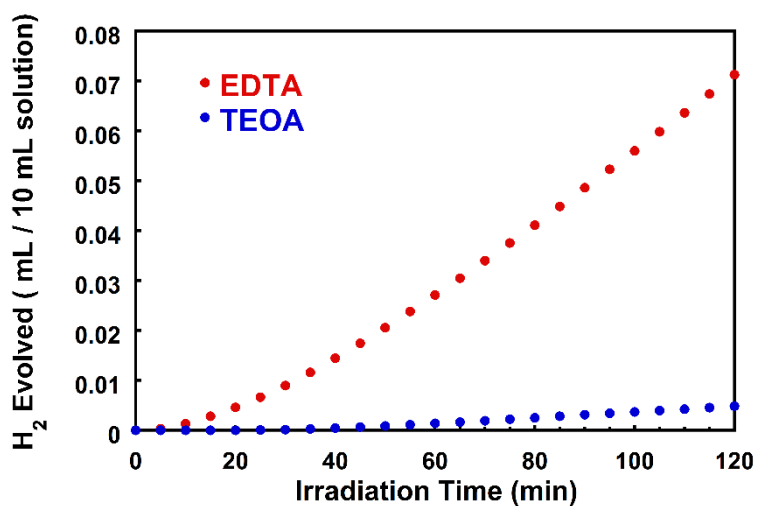

**Figure S10.** Photochemical H<sub>2</sub> evolution from an aqueous acetate buffer solution (0.1 M, pH = 5.0, 10 mL, at 20 °C under Ar atmosphere) containing 0.05 mM PtL<sup>2+</sup>-C1-MV<sup>2+</sup>, 0.1 M NaCl and 30 mM electron donor (EDTA or TEOA).

(a)

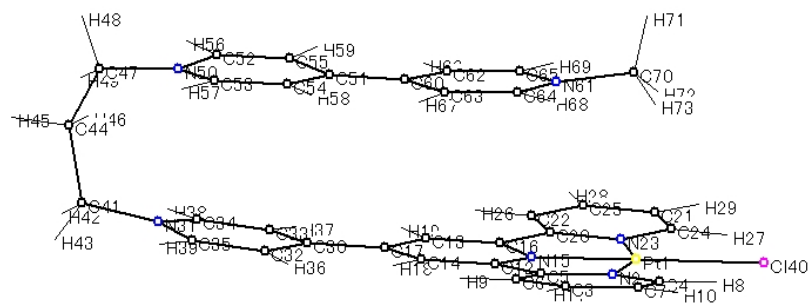

(b)

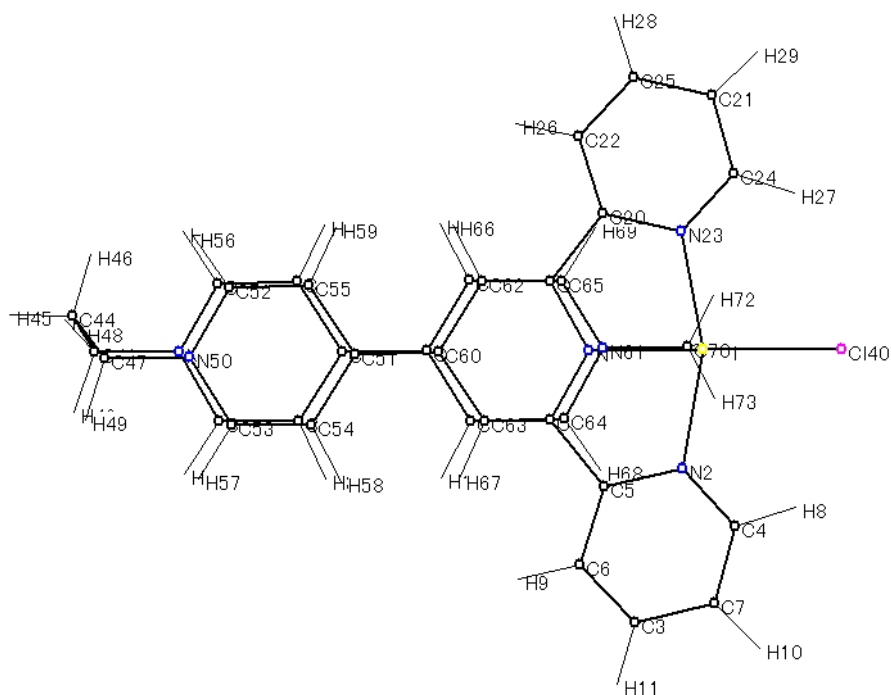

**Figure S11.** Stereo views showing the geometries for (a) the closed-shell singlet state and (b) the open-shell singlet state of the two-electron-reduced form of [PtL<sup>2+</sup>-C1-MV<sup>2+</sup>]<sup>4+</sup>. The structures were optimized at the M06 and UM06 level of DFT calculations with the effect of water solvation taken into consideration using the polarizable continuum model (PCM) method, where the SDD basis set was used for Pt and the 6-31G\*\* basis set for H, C, N, O, and Cl.

**Table S2.** DFT-optimized geometry of the one-electron-reduced form  $[\text{PtL}^{1.5+}\text{-C1-MV}^{1.5+}]^{3+}$  (doublet) having an intramolecular stacking geometry, computed at the M06/SDD(Pt)/6-31G\*\*(HCNOCl) level using PCM.<sup>a</sup>

| Atom | X         | Y         | Z         | Spin Density |
|------|-----------|-----------|-----------|--------------|
| Pt1  | 3.147621  | 0.051731  | -0.393954 | 0.018133     |
| N2   | 2.963529  | -2.001237 | -0.322334 | 0.000761     |
| C3   | 2.386626  | -4.701430 | -0.272043 | 0.002030     |
| C4   | 3.920363  | -2.884739 | -0.020903 | 0.001343     |
| C5   | 1.695351  | -2.430953 | -0.605118 | 0.001656     |
| C6   | 1.389201  | -3.781914 | -0.581497 | -0.000452    |
| C7   | 3.667117  | -4.249591 | 0.012502  | 0.000461     |
| H8   | 4.899654  | -2.464721 | 0.194411  | -0.000062    |
| H9   | 0.380821  | -4.118698 | -0.800604 | -0.000001    |
| H10  | 4.469121  | -4.936198 | 0.260141  | -0.000038    |
| H11  | 2.157702  | -5.762278 | -0.252699 | -0.000100    |
| C12  | 0.721444  | -1.366187 | -0.896742 | -0.012347    |
| C13  | -0.813551 | 0.899253  | -1.325849 | 0.028529     |
| C14  | -0.626894 | -1.511655 | -1.167817 | 0.038482     |
| N15  | 1.254001  | -0.125895 | -0.852686 | 0.075275     |
| C16  | 0.537756  | 1.001684  | -1.051923 | -0.005393    |
| C17  | -1.420929 | -0.368973 | -1.379343 | 0.006600     |
| H18  | -1.055137 | -2.506524 | -1.229935 | -0.001566    |
| H19  | -1.404577 | 1.802674  | -1.439038 | -0.001535    |
| C20  | 1.327546  | 2.233169  | -0.890538 | -0.001405    |
| C21  | 2.975744  | 4.399037  | -0.475308 | 0.003814     |
| C22  | 0.808314  | 3.513393  | -1.003583 | 0.002896     |
| N23  | 2.646324  | 2.044399  | -0.577458 | 0.003890     |
| C24  | 3.446023  | 3.096691  | -0.374429 | 0.000762     |
| C25  | 1.641381  | 4.607536  | -0.793933 | 0.001154     |
| H26  | -0.239302 | 3.660208  | -1.247670 | -0.000137    |
| H27  | 4.478674  | 2.864816  | -0.125443 | -0.000050    |
| H28  | 1.243775  | 5.614039  | -0.877992 | -0.000085    |
| H29  | 3.654284  | 5.227071  | -0.302315 | -0.000197    |
| C30  | -2.865584 | -0.479782 | -1.578704 | 0.078768     |
| N31  | -5.647711 | -0.561749 | -1.660278 | 0.040745     |

|      |           |           |           |           |
|------|-----------|-----------|-----------|-----------|
| C32  | -3.578893 | -1.624803 | -1.184680 | -0.007814 |
| C33  | -3.618356 | 0.583739  | -2.115283 | -0.005775 |
| C34  | -4.986721 | 0.523454  | -2.137156 | 0.027220  |
| C35  | -4.950676 | -1.642247 | -1.236490 | 0.032701  |
| H36  | -3.083682 | -2.497737 | -0.771906 | -0.000353 |
| H37  | -3.147094 | 1.471667  | -2.522181 | 0.000098  |
| H38  | -5.598485 | 1.331477  | -2.525550 | -0.001303 |
| H39  | -5.532534 | -2.498958 | -0.911898 | -0.001786 |
| C140 | 5.429736  | 0.270242  | 0.203937  | 0.001196  |
| C41  | -7.126130 | -0.527944 | -1.574303 | -0.002608 |
| H42  | -7.456964 | -1.534161 | -1.301216 | 0.000172  |
| H43  | -7.508144 | -0.310757 | -2.576275 | 0.000841  |
| C44  | -7.629873 | 0.511993  | -0.584467 | 0.006550  |
| H45  | -8.719250 | 0.555412  | -0.693126 | 0.001110  |
| H46  | -7.273731 | 1.511180  | -0.867179 | -0.000230 |
| C47  | -7.342955 | 0.234404  | 0.883645  | -0.008002 |
| H48  | -7.838864 | 0.988805  | 1.503054  | 0.004516  |
| H49  | -7.735832 | -0.743599 | 1.178350  | 0.000138  |
| N50  | -5.906938 | 0.241405  | 1.225220  | 0.112856  |
| C51  | -3.163657 | 0.260212  | 1.833458  | 0.138705  |
| C52  | -5.169281 | 1.378678  | 1.056223  | 0.063760  |
| C53  | -5.310130 | -0.863015 | 1.753596  | 0.046845  |
| C54  | -3.976751 | -0.879084 | 2.054553  | 0.016746  |
| C55  | -3.835175 | 1.412471  | 1.347302  | 0.009008  |
| H56  | -5.702376 | 2.245828  | 0.678825  | -0.003623 |
| H57  | -5.950863 | -1.723622 | 1.918283  | -0.002521 |
| H58  | -3.576966 | -1.792698 | 2.480354  | -0.001430 |
| H59  | -3.309007 | 2.343500  | 1.162546  | -0.001531 |
| C60  | -1.744456 | 0.247330  | 2.098174  | 0.087559  |
| N61  | 1.005266  | 0.219372  | 2.658345  | 0.093610  |
| C62  | -0.966445 | 1.431179  | 2.107821  | 0.035447  |
| C63  | -1.041171 | -0.955470 | 2.355753  | 0.032344  |
| C64  | 0.299297  | -0.941411 | 2.633751  | 0.027982  |
| C65  | 0.372143  | 1.391693  | 2.394300  | 0.020470  |
| H66  | -1.406671 | 2.405511  | 1.921944  | -0.002227 |
| H67  | -1.533938 | -1.921582 | 2.325477  | -0.002305 |

|     |          |           |          |           |
|-----|----------|-----------|----------|-----------|
| H68 | 0.859231 | -1.846791 | 2.847055 | -0.001892 |
| H69 | 0.986472 | 2.287126  | 2.428891 | -0.001570 |
| C70 | 2.416398 | 0.213027  | 3.061221 | -0.006584 |
| H71 | 2.489461 | 0.325384  | 4.146340 | 0.006980  |
| H72 | 2.939034 | 1.032092  | 2.561367 | 0.001395  |
| H73 | 2.871458 | -0.730136 | 2.750627 | 0.001374  |

---

<sup>a</sup>Part of the Gaussian output file:

SCF Done: E(UM06) = -2220.78912991 A.U. after 9 cycles

|                |         |         |         |
|----------------|---------|---------|---------|
|                | 1       | 2       | 3       |
|                | A       | A       | A       |
| Frequencies -- | 12.3858 | 21.2898 | 32.7114 |
| Red. masses -- | 6.1204  | 7.2848  | 5.5882  |

|                                              |                             |
|----------------------------------------------|-----------------------------|
| Zero-point correction=                       | 0.590605 (Hartree/Particle) |
| Thermal correction to Energy=                | 0.625193                    |
| Thermal correction to Enthalpy=              | 0.626137                    |
| Thermal correction to Gibbs Free Energy=     | 0.523964                    |
| Sum of electronic and zero-point Energies=   | -2220.198525                |
| Sum of electronic and thermal Energies=      | -2220.163937                |
| Sum of electronic and thermal Enthalpies=    | -2220.162993                |
| Sum of electronic and thermal Free Energies= | -2220.265165                |

| Item          | Value    | Threshold | Converged? |
|---------------|----------|-----------|------------|
| Maximum Force | 0.000151 | 0.000450  | YES        |
| RMS Force     | 0.000015 | 0.000300  | YES        |

**Table S3.** DFT-optimized geometry of the one-electron-reduced form  $[\text{PtL}^{2+}\text{-C1-MV}^+\cdot]^{3+}$  (doublet) without having a stacking geometry, computed at the M06/SDD(Pt)/6-31G\*\*(HCNOCl) level using PCM.<sup>a</sup>

| Atom | X         | Y         | Z         | Spin Density |
|------|-----------|-----------|-----------|--------------|
| Pt1  | -5.784572 | -0.677936 | 0.247285  | 0.000002     |
| N2   | -4.890449 | -2.356598 | -0.554777 | 0.000000     |
| C3   | -3.412921 | -4.405418 | -1.672708 | 0.000000     |
| C4   | -5.454842 | -3.548179 | -0.770079 | 0.000000     |
| C5   | -3.579553 | -2.148395 | -0.886972 | 0.000000     |
| C6   | -2.824368 | -3.164227 | -1.448602 | 0.000000     |
| C7   | -4.742003 | -4.601139 | -1.330235 | 0.000000     |
| C8   | -3.066764 | -0.797162 | -0.612524 | -0.000002    |
| C9   | -2.469128 | 1.830121  | 0.042938  | 0.000005     |
| C10  | -1.787997 | -0.315719 | -0.852682 | 0.000006     |
| N11  | -3.981685 | 0.028514  | -0.070386 | 0.000009     |
| C12  | -3.736300 | 1.309684  | 0.264078  | -0.000001    |
| C13  | -1.487500 | 1.009728  | -0.522470 | -0.000001    |
| C14  | -4.900170 | 2.002714  | 0.839129  | 0.000000     |
| C15  | -7.190535 | 3.109229  | 1.883169  | 0.000000     |
| C16  | -4.884062 | 3.322082  | 1.259373  | 0.000000     |
| N17  | -6.038998 | 1.252228  | 0.941734  | 0.000000     |
| C18  | -7.151996 | 1.789954  | 1.448531  | 0.000000     |
| C19  | -6.043548 | 3.881938  | 1.787934  | 0.000000     |
| C20  | -0.134748 | 1.541564  | -0.771283 | 0.000020     |
| N21  | 2.395650  | 2.536284  | -1.243447 | -0.000030    |
| C22  | 0.585156  | 1.161822  | -1.908548 | -0.000003    |
| C23  | 0.461844  | 2.437680  | 0.121104  | -0.000011    |
| C24  | 1.727194  | 2.915745  | -0.134875 | 0.000027     |
| C25  | 1.845277  | 1.672161  | -2.121221 | 0.000016     |
| Cl26 | -7.954187 | -1.531697 | 0.629490  | 0.000000     |
| N27  | 7.259468  | 1.683067  | -0.706219 | 0.154824     |
| C28  | 9.455091  | 0.086164  | 0.094262  | 0.175975     |
| C29  | 7.070379  | 0.580780  | 0.079077  | 0.057906     |
| C30  | 8.536202  | 1.996825  | -1.094910 | 0.065125     |
| C31  | 9.606620  | 1.245053  | -0.725157 | 0.029122     |

|     |           |           |           |           |
|-----|-----------|-----------|-----------|-----------|
| C32 | 8.111001  | -0.205559 | 0.471313  | 0.044028  |
| C33 | 10.559936 | -0.716061 | 0.503341  | 0.146077  |
| N34 | 12.746266 | -2.307688 | 1.310942  | 0.151828  |
| C35 | 10.403668 | -1.881915 | 1.309822  | 0.054550  |
| C36 | 11.905425 | -0.412569 | 0.138765  | 0.045473  |
| C37 | 12.943377 | -1.195257 | 0.542717  | 0.049142  |
| C38 | 11.475708 | -2.632869 | 1.687322  | 0.044244  |
| C39 | 13.891789 | -3.088198 | 1.768615  | -0.011967 |
| C40 | 3.773452  | 3.025638  | -1.473577 | -0.000085 |
| C41 | 4.785159  | 2.046041  | -0.900024 | 0.000904  |
| C42 | 6.181639  | 2.599771  | -1.102253 | -0.012599 |
| H43 | -6.499382 | -3.635913 | -0.482603 | 0.000000  |
| H44 | -1.785249 | -2.994846 | -1.711964 | 0.000000  |
| H45 | -5.234207 | -5.554244 | -1.489881 | 0.000000  |
| H46 | -2.831751 | -5.209221 | -2.113319 | 0.000000  |
| H47 | -1.023657 | -0.966654 | -1.265816 | 0.000000  |
| H48 | -2.249775 | 2.867169  | 0.278434  | 0.000000  |
| H49 | -3.977062 | 3.912070  | 1.178390  | 0.000000  |
| H50 | -8.016460 | 1.132594  | 1.495339  | 0.000000  |
| H51 | -6.043641 | 4.915205  | 2.120121  | 0.000000  |
| H52 | -8.113113 | 3.510733  | 2.288056  | 0.000000  |
| H53 | 0.164851  | 0.490471  | -2.650155 | 0.000000  |
| H54 | -0.037121 | 2.750300  | 1.032270  | 0.000000  |
| H55 | 2.238439  | 3.602562  | 0.531475  | -0.000002 |
| H56 | 2.441923  | 1.416878  | -2.991025 | -0.000002 |
| H57 | 6.052979  | 0.353831  | 0.373359  | -0.003622 |
| H58 | 8.635362  | 2.881390  | -1.716164 | -0.003813 |
| H59 | 10.579125 | 1.563606  | -1.084035 | -0.002648 |
| H60 | 7.868066  | -1.064776 | 1.086636  | -0.003383 |
| H61 | 9.427481  | -2.212241 | 1.646945  | -0.003672 |
| H62 | 12.147576 | 0.451339  | -0.470377 | -0.003257 |
| H63 | 13.973904 | -0.979760 | 0.278523  | -0.003070 |
| H64 | 11.374472 | -3.521961 | 2.300858  | -0.002859 |
| H65 | 14.388220 | -2.583396 | 2.602938  | 0.010285  |
| H66 | 13.551601 | -4.071988 | 2.094700  | 0.001105  |
| H67 | 14.601225 | -3.212541 | 0.947476  | 0.004657  |



|     |          |          |           |           |
|-----|----------|----------|-----------|-----------|
| H68 | 3.852485 | 4.011294 | -1.005693 | 0.000019  |
| H69 | 4.568746 | 1.902009 | 0.166554  | -0.000178 |
| H70 | 4.678889 | 1.073502 | -1.399918 | -0.000225 |
| H71 | 6.302068 | 3.536039 | -0.540647 | 0.010357  |
| H72 | 6.337446 | 2.834433 | -2.162719 | 0.005722  |
| H73 | 3.897712 | 3.157136 | -2.552498 | 0.000002  |

---

<sup>a</sup>Part of the Gaussian output file:

SCF Done: E(UM06) = -2220.76879091 A.U. after 6 cycles

|                |        |         |         |
|----------------|--------|---------|---------|
|                | 1      | 2       | 3       |
|                | A      | A       | A       |
| Frequencies -- | 4.7690 | 14.2057 | 23.2469 |
| Red. masses -- | 3.3419 | 6.6854  | 4.6384  |

Zero-point correction= 0.590224 (Hartree/Particle)  
 Thermal correction to Energy= 0.626349  
 Thermal correction to Enthalpy= 0.627293  
 Thermal correction to Gibbs Free Energy= 0.515807  
 Sum of electronic and zero-point Energies= -2220.178567  
 Sum of electronic and thermal Energies= -2220.142442  
 Sum of electronic and thermal Enthalpies= -2220.141497  
 Sum of electronic and thermal Free Energies= -2220.252984

| Item          | Value    | Threshold | Converged? |
|---------------|----------|-----------|------------|
| Maximum Force | 0.000008 | 0.000450  | YES        |
| RMS Force     | 0.000001 | 0.000300  | YES        |

**Table S4.** DFT-optimized geometry of the one-electron-reduced form **PtL<sup>+</sup>** (doublet), computed at the M06/SDD(Pt)/6-31G\*\*(HCNOCl) level using PCM.<sup>a</sup>

| Atom | X         | Y         | Z         | Spin Density |
|------|-----------|-----------|-----------|--------------|
| Pt1  | 2.093212  | 0.000397  | 0.000897  | 0.041820     |
| N2   | 1.736281  | -2.034663 | -0.003438 | 0.012499     |
| C3   | 0.937566  | -4.681214 | -0.005809 | 0.008754     |
| C4   | 2.650557  | -3.015277 | -0.001011 | 0.002374     |
| C5   | 0.400465  | -2.341866 | -0.007208 | 0.002368     |
| C6   | -0.010957 | -3.669033 | -0.008357 | 0.004513     |
| C7   | 2.289400  | -4.352388 | -0.002062 | 0.013512     |
| C8   | -0.511346 | -1.193967 | -0.006604 | 0.025208     |
| C9   | -1.884562 | 1.214231  | 0.001694  | 0.043565     |
| C10  | -1.883835 | -1.215643 | -0.010917 | 0.043969     |
| N11  | 0.143274  | -0.000162 | -0.000708 | 0.214590     |
| C12  | -0.512030 | 1.193311  | 0.002470  | 0.025563     |
| C13  | -2.628585 | -0.000902 | -0.005826 | 0.126205     |
| C14  | 0.399137  | 2.341687  | 0.005957  | 0.002322     |
| C15  | 2.286954  | 4.353278  | 0.007414  | 0.013619     |
| C16  | -0.013029 | 3.668634  | 0.007431  | 0.004593     |
| N17  | 1.735142  | 2.035234  | 0.005058  | 0.012588     |
| C18  | 2.648867  | 3.016381  | 0.005824  | 0.002339     |
| C19  | 0.934918  | 4.681342  | 0.008244  | 0.008729     |
| C20  | -4.063410 | -0.001554 | -0.007917 | 0.130679     |
| N21  | -6.883779 | -0.003220 | -0.016152 | 0.121514     |
| C22  | -4.827979 | -1.200921 | 0.032292  | 0.034442     |
| C23  | -4.828970 | 1.197338  | -0.052850 | 0.032023     |
| C24  | -6.191681 | 1.170687  | -0.053401 | 0.043535     |
| C25  | -6.191095 | -1.175827 | 0.028956  | 0.042505     |
| Cl26 | 4.487858  | 0.000949  | 0.001986  | 0.002481     |
| C27  | -8.343766 | 0.005350  | 0.043771  | -0.009655    |
| H28  | -8.725319 | 0.832222  | -0.557948 | 0.002698     |
| H29  | 3.687909  | -2.689663 | 0.002044  | -0.000229    |
| H30  | -1.070332 | -3.906326 | -0.010277 | -0.000259    |
| H31  | 3.059655  | -5.115929 | 0.000460  | -0.000729    |

|     |           |           |           |           |
|-----|-----------|-----------|-----------|-----------|
| H32 | 0.622928  | -5.720396 | -0.006291 | -0.000532 |
| H33 | -2.391165 | -2.174474 | -0.025199 | -0.002842 |
| H34 | -2.392422 | 2.172808  | 0.014224  | -0.002826 |
| H35 | -1.072540 | 3.905326  | 0.007269  | -0.000262 |
| H36 | 3.686411  | 2.691370  | 0.004959  | -0.000228 |
| H37 | 0.619696  | 5.720347  | 0.009156  | -0.000532 |
| H38 | 3.056785  | 5.117250  | 0.007711  | -0.000734 |
| H39 | -4.355776 | -2.176184 | 0.071463  | -0.002600 |
| H40 | -4.357403 | 2.172620  | -0.099260 | -0.002479 |
| H41 | -6.791295 | 2.074529  | -0.086636 | -0.002609 |
| H42 | -6.788167 | -2.081317 | 0.060120  | -0.002577 |
| H43 | -8.681587 | 0.121630  | 1.077727  | 0.008490  |
| H44 | -8.727619 | -0.933076 | -0.359132 | 0.001598  |

---

<sup>a</sup>Part of the Gaussian output file:

SCF Done: E(UM06) = -1608.22289782 A.U. after 6 cycles

|                |         |         |         |
|----------------|---------|---------|---------|
|                | 1       | 2       | 3       |
|                | A       | A       | A       |
| Frequencies -- | 40.7681 | 47.1626 | 53.4210 |
| Red. masses -- | 6.0981  | 5.1882  | 3.5333  |

Zero-point correction= 0.338944 (Hartree/Particle)  
Thermal correction to Energy= 0.361744  
Thermal correction to Enthalpy= 0.362688  
Thermal correction to Gibbs Free Energy= 0.285119  
Sum of electronic and zero-point Energies= -1607.883954  
Sum of electronic and thermal Energies= -1607.861154  
Sum of electronic and thermal Enthalpies= -1607.860210  
Sum of electronic and thermal Free Energies= -1607.937779

| Item          | Value    | Threshold | Converged? |
|---------------|----------|-----------|------------|
| Maximum Force | 0.000005 | 0.000450  | YES        |
| RMS Force     | 0.000001 | 0.000300  | YES        |

**Table S5.** DFT-optimized geometry of the two-electron-reduced form  $[\text{PtL}^+-\text{C1-MV}^+]^{2+}$  (closed-shell singlet), computed at the M06/SDD(Pt)/6-31G\*\*(HCNOCl) level using PCM.<sup>a</sup>

| Atom | X         | Y         | Z         |
|------|-----------|-----------|-----------|
| Pt1  | 3.190226  | 0.012110  | -0.402612 |
| N2   | 2.838096  | -2.026068 | -0.436850 |
| C3   | 2.029195  | -4.668795 | -0.422991 |
| C4   | 3.726368  | -3.001195 | -0.200143 |
| C5   | 1.524449  | -2.335736 | -0.669553 |
| C6   | 1.106508  | -3.660392 | -0.664450 |
| C7   | 3.358672  | -4.337215 | -0.186347 |
| H8   | 4.746908  | -2.672631 | -0.019037 |
| H9   | 0.063016  | -3.900332 | -0.844748 |
| H10  | 4.107470  | -5.097454 | 0.007759  |
| H11  | 1.710249  | -5.706581 | -0.416498 |
| C12  | 0.632126  | -1.188417 | -0.878696 |
| C13  | -0.734022 | 1.208224  | -1.102599 |
| C14  | -0.721062 | -1.219012 | -1.114713 |
| N15  | 1.273995  | 0.003770  | -0.787446 |
| C16  | 0.619576  | 1.189940  | -0.868775 |
| C17  | -1.457923 | -0.008793 | -1.241462 |
| H18  | -1.221849 | -2.179634 | -1.174874 |
| H19  | -1.244753 | 2.163920  | -1.153715 |
| C20  | 1.500377  | 2.344673  | -0.651433 |
| C21  | 3.313928  | 4.360893  | -0.152515 |
| C22  | 1.069363  | 3.665053  | -0.638747 |
| N23  | 2.816815  | 2.046401  | -0.419519 |
| C24  | 3.695002  | 3.028766  | -0.174797 |
| C25  | 1.981630  | 4.680934  | -0.389333 |
| H26  | 0.023895  | 3.895958  | -0.819342 |
| H27  | 4.718613  | 2.709299  | 0.005365  |
| H28  | 1.652509  | 5.715476  | -0.376875 |
| H29  | 4.054924  | 5.127106  | 0.047903  |
| C30  | -2.874603 | -0.016267 | -1.481427 |
| N31  | -5.679969 | -0.033360 | -1.725530 |

|      |           |           |           |
|------|-----------|-----------|-----------|
| C32  | -3.619547 | -1.218846 | -1.617183 |
| C33  | -3.635495 | 1.179848  | -1.598628 |
| C34  | -4.992695 | 1.147744  | -1.713327 |
| C35  | -4.979381 | -1.202170 | -1.725110 |
| H36  | -3.141392 | -2.192062 | -1.611328 |
| H37  | -3.167495 | 2.158014  | -1.584656 |
| H38  | -5.591547 | 2.050411  | -1.787079 |
| H39  | -5.567061 | -2.112674 | -1.791081 |
| Cl40 | 5.527375  | 0.022574  | 0.089612  |
| C41  | -7.150555 | -0.023570 | -1.701859 |
| H42  | -7.482464 | -1.060049 | -1.819357 |
| H43  | -7.503351 | 0.536392  | -2.574951 |
| C44  | -7.721149 | 0.590544  | -0.430994 |
| H45  | -8.812402 | 0.605300  | -0.534367 |
| H46  | -7.423800 | 1.644939  | -0.354533 |
| C47  | -7.392200 | -0.145469 | 0.860970  |
| H48  | -7.948479 | 0.309540  | 1.688767  |
| H49  | -7.700659 | -1.194539 | 0.797258  |
| N50  | -5.963324 | -0.134078 | 1.203044  |
| C51  | -3.183425 | -0.075647 | 1.715175  |
| C52  | -5.317748 | 1.054598  | 1.426820  |
| C53  | -5.249111 | -1.295552 | 1.317417  |
| C54  | -3.911301 | -1.293818 | 1.571568  |
| C55  | -3.980950 | 1.107860  | 1.671706  |
| H56  | -5.936205 | 1.946764  | 1.401893  |
| H57  | -5.809683 | -2.215532 | 1.181622  |
| H58  | -3.419649 | -2.259327 | 1.632495  |
| H59  | -3.548895 | 2.089293  | 1.835722  |
| C60  | -1.776650 | -0.042902 | 1.946716  |
| N61  | 0.985335  | 0.019638  | 2.540397  |
| C62  | -1.048740 | 1.175959  | 2.087086  |
| C63  | -0.990968 | -1.227150 | 2.072827  |
| C64  | 0.337391  | -1.169654 | 2.376652  |
| C65  | 0.281519  | 1.178958  | 2.387423  |
| H66  | -1.528266 | 2.142265  | 1.963743  |
| H67  | -1.424958 | -2.214271 | 1.947576  |

|     |          |           |          |
|-----|----------|-----------|----------|
| H68 | 0.942508 | -2.061898 | 2.509292 |
| H69 | 0.844704 | 2.097529  | 2.526135 |
| C70 | 2.359516 | 0.054108  | 3.040630 |
| H71 | 2.360834 | 0.090415  | 4.134742 |
| H72 | 2.868648 | 0.935683  | 2.642475 |
| H73 | 2.890409 | -0.838793 | 2.701938 |

---

Part of the Gaussian output file:

```

SCF Done: E(RM06) = -2220.94182487 A.U. after 7 cycles 1
2 3
A A A
Frequencies -- 18.8555 26.1787 29.1734
Red. masses -- 5.1024 6.1793 5.4375

```

```

Zero-point correction= 0.588027 (Hartree/Particle)
Thermal correction to Energy= 0.623109
Thermal correction to Enthalpy= 0.624053
Thermal correction to Gibbs Free Energy= 0.522159
Sum of electronic and zero-point Energies= -2220.353798
Sum of electronic and thermal Energies= -2220.318716
Sum of electronic and thermal Enthalpies= -2220.317772
Sum of electronic and thermal Free Energies= -2220.419666

```

| Item          | Value    | Threshold | Converged? |
|---------------|----------|-----------|------------|
| Maximum Force | 0.000032 | 0.000450  | YES        |
| RMS Force     | 0.000004 | 0.000300  | YES        |

**Table S6.** DFT-optimized geometry of the two-electron-reduced form  $[\text{PtL}^+-\text{C1-MV}^+]^{2+}$  (open-shell singlet), computed at the M06/SDD(Pt)/6-31G\*\*(HCNOCl) level using PCM.<sup>a</sup>

| Atom | X         | Y         | Z         | Spin Density |
|------|-----------|-----------|-----------|--------------|
| Pt1  | 3.188958  | 0.013163  | -0.403416 | 0.000000     |
| N2   | 2.838824  | -2.025348 | -0.437088 | -0.000001    |
| C3   | 2.032491  | -4.668809 | -0.420703 | 0.000001     |
| C4   | 3.728035  | -2.999365 | -0.199375 | 0.000001     |
| C5   | 1.525475  | -2.336466 | -0.669474 | 0.000001     |
| C6   | 1.108833  | -3.661526 | -0.663186 | -0.000002    |
| C7   | 3.361635  | -4.335724 | -0.184279 | -0.000002    |
| H8   | 4.748229  | -2.669604 | -0.018461 | 0.000000     |
| H9   | 0.065574  | -3.902638 | -0.843250 | 0.000000     |
| H10  | 4.111128  | -5.095066 | 0.010652  | 0.000000     |
| H11  | 1.714543  | -5.706894 | -0.413230 | 0.000000     |
| C12  | 0.632076  | -1.190125 | -0.879426 | 0.000000     |
| C13  | -0.736065 | 1.205184  | -1.105272 | 0.000000     |
| C14  | -0.721063 | -1.222080 | -1.115423 | 0.000000     |
| N15  | 1.272902  | 0.002713  | -0.788964 | -0.000002    |
| C16  | 0.617461  | 1.188258  | -0.870992 | 0.000000     |
| C17  | -1.458862 | -0.012512 | -1.243253 | -0.000001    |
| H18  | -1.221126 | -2.183121 | -1.174998 | 0.000000     |
| H19  | -1.247831 | 2.160321  | -1.156111 | 0.000000     |
| C20  | 1.496937  | 2.343935  | -0.653312 | 0.000001     |
| C21  | 3.307776  | 4.362037  | -0.152357 | -0.000002    |
| C22  | 1.064516  | 3.663876  | -0.641217 | -0.000001    |
| N23  | 2.813462  | 2.047052  | -0.420202 | -0.000001    |
| C24  | 3.690325  | 3.030333  | -0.174415 | 0.000001     |
| C25  | 1.975411  | 4.680708  | -0.390742 | 0.000001     |
| H26  | 0.019008  | 3.893690  | -0.823009 | 0.000000     |
| H27  | 4.714109  | 2.711989  | 0.006735  | 0.000000     |
| H28  | 1.645197  | 5.714905  | -0.378653 | 0.000000     |
| H29  | 4.047728  | 5.129009  | 0.049006  | 0.000000     |
| C30  | -2.875586 | -0.021112 | -1.483097 | 0.000000     |
| N31  | -5.681117 | -0.039371 | -1.724015 | 0.000001     |

|      |           |           |           |           |
|------|-----------|-----------|-----------|-----------|
| C32  | -3.620379 | -1.224221 | -1.614042 | 0.000001  |
| C33  | -3.636711 | 1.174511  | -1.604080 | 0.000001  |
| C34  | -4.994021 | 1.141880  | -1.717168 | -0.000001 |
| C35  | -4.980374 | -1.208070 | -1.720285 | -0.000002 |
| H36  | -3.142147 | -2.197370 | -1.604737 | 0.000000  |
| H37  | -3.168692 | 2.152713  | -1.594912 | 0.000000  |
| H38  | -5.592939 | 2.044255  | -1.793856 | 0.000000  |
| H39  | -5.568006 | -2.118900 | -1.782030 | 0.000000  |
| C140 | 5.526034  | 0.026253  | 0.089109  | 0.000000  |
| C41  | -7.151702 | -0.030082 | -1.697692 | 0.000000  |
| H42  | -7.483419 | -1.067210 | -1.809423 | 0.000000  |
| H43  | -7.506372 | 0.525336  | -2.572917 | 0.000000  |
| C44  | -7.719926 | 0.590428  | -0.428852 | 0.000000  |
| H45  | -8.811312 | 0.605861  | -0.530759 | 0.000000  |
| H46  | -7.421431 | 1.644841  | -0.357581 | 0.000000  |
| C47  | -7.389876 | -0.140105 | 0.865979  | 0.000000  |
| H48  | -7.943682 | 0.319906  | 1.692667  | 0.000000  |
| H49  | -7.700463 | -1.188921 | 0.808135  | 0.000000  |
| N50  | -5.960314 | -0.129428 | 1.205254  | 0.000001  |
| C51  | -3.179738 | -0.072605 | 1.713852  | 0.000002  |
| C52  | -5.313059 | 1.059248  | 1.424464  | 0.000001  |
| C53  | -5.247181 | -1.291365 | 1.321591  | 0.000001  |
| C54  | -3.909053 | -1.290362 | 1.573986  | 0.000000  |
| C55  | -3.975932 | 1.111736  | 1.667704  | 0.000000  |
| H56  | -5.930603 | 1.952009  | 1.397641  | 0.000000  |
| H57  | -5.808956 | -2.211079 | 1.188946  | 0.000000  |
| H58  | -3.418233 | -2.256203 | 1.636417  | 0.000000  |
| H59  | -3.542482 | 2.093149  | 1.828306  | 0.000000  |
| C60  | -1.772893 | -0.041041 | 1.945323  | 0.000000  |
| N61  | 0.988558  | 0.019168  | 2.541522  | 0.000000  |
| C62  | -1.043409 | 1.177144  | 2.083380  | 0.000000  |
| C63  | -0.988759 | -1.226061 | 2.073983  | 0.000001  |
| C64  | 0.339308  | -1.169689 | 2.379113  | 0.000000  |
| C65  | 0.286589  | 1.179033  | 2.385250  | 0.000000  |
| H66  | -1.521488 | 2.143849  | 1.957348  | 0.000000  |
| H67  | -1.423954 | -2.212832 | 1.950127  | 0.000000  |



|     |          |           |          |          |
|-----|----------|-----------|----------|----------|
| H68 | 0.943276 | -2.062363 | 2.514166 | 0.000000 |
| H69 | 0.850849 | 2.097213  | 2.522331 | 0.000000 |
| C70 | 2.361390 | 0.051179  | 3.045608 | 0.000000 |
| H71 | 2.359701 | 0.070827  | 4.140149 | 0.000000 |
| H72 | 2.867478 | 0.941139  | 2.662989 | 0.000000 |
| H73 | 2.896805 | -0.834379 | 2.694835 | 0.000000 |

---

<sup>a</sup>Part of the Gaussian output file:

SCF Done: E(UM06) = -2220.94182738 A.U. after 30 cycles

Annihilation of the first spin contaminant:

S\*\*2 before annihilation 0.0000, after 0.0000

|                |         |         |         |
|----------------|---------|---------|---------|
|                | 1       | 2       | 3       |
|                | A       | A       | A       |
| Frequencies -- | 20.2220 | 26.2330 | 29.3215 |
| Red. masses -- | 4.9986  | 6.3129  | 5.6032  |

|                                              |                             |
|----------------------------------------------|-----------------------------|
| Zero-point correction=                       | 0.587950 (Hartree/Particle) |
| Thermal correction to Energy=                | 0.623074                    |
| Thermal correction to Enthalpy=              | 0.624018                    |
| Thermal correction to Gibbs Free Energy=     | 0.522044                    |
| Sum of electronic and zero-point Energies=   | -2220.353877                |
| Sum of electronic and thermal Energies=      | -2220.318753                |
| Sum of electronic and thermal Enthalpies=    | -2220.317809                |
| Sum of electronic and thermal Free Energies= | -2220.419783                |

| Item          | Value    | Threshold | Converged? |
|---------------|----------|-----------|------------|
| Maximum Force | 0.000335 | 0.000450  | YES        |
| RMS Force     | 0.000039 | 0.000300  | YES        |

**Table S7.** DFT-optimized geometry of the two-electron-reduced form  $[\text{PtL}^+-\text{C2-MV}^+]^{2+}$  (closed-shell singlet), computed at the M06/SDD(Pt)/6-31G\*\*(HCNOCl) level using PCM.<sup>a</sup>

| Atom | X         | Y         | Z         |
|------|-----------|-----------|-----------|
| Pt1  | 3.361958  | -0.014237 | -0.411785 |
| N2   | 3.012714  | 2.024354  | -0.421189 |
| C3   | 2.208878  | 4.668384  | -0.372617 |
| C4   | 3.904118  | 2.995325  | -0.177630 |
| C5   | 1.698139  | 2.338997  | -0.642341 |
| C6   | 1.283071  | 3.664716  | -0.620414 |
| C7   | 3.539150  | 4.331522  | -0.146262 |
| C8   | 0.802469  | 1.195586  | -0.854508 |
| C9   | -0.570935 | -1.197359 | -1.086159 |
| C10  | -0.553361 | 1.230343  | -1.069179 |
| N11  | 1.443757  | 0.000903  | -0.784322 |
| C12  | 0.785857  | -1.183852 | -0.869574 |
| C13  | -1.295297 | 0.022140  | -1.192647 |
| C14  | 1.667073  | -2.341555 | -0.674600 |
| C15  | 3.484567  | -4.366326 | -0.225065 |
| C16  | 1.235346  | -3.662034 | -0.676465 |
| N17  | 2.986141  | -2.047514 | -0.450556 |
| C18  | 3.866054  | -3.034348 | -0.230387 |
| C19  | 2.149278  | -4.681916 | -0.452299 |
| C20  | -2.714852 | 0.036702  | -1.419251 |
| N21  | -5.495746 | 0.077196  | -1.882372 |
| C22  | -3.453567 | 1.246635  | -1.519697 |
| C23  | -3.479760 | -1.150903 | -1.577852 |
| C24  | -4.825425 | -1.105857 | -1.805391 |
| C25  | -4.798184 | 1.240393  | -1.741484 |
| Cl26 | 5.701363  | -0.029947 | 0.074128  |
| C27  | -3.727969 | -1.238323 | 1.608406  |
| C28  | -5.139051 | 1.111504  | 1.527593  |
| C29  | -2.991701 | -0.019649 | 1.710422  |
| C30  | -5.082850 | -1.240123 | 1.485196  |
| N31  | -5.807991 | -0.078921 | 1.451946  |

|     |           |           |           |
|-----|-----------|-----------|-----------|
| C32 | -3.782968 | 1.166317  | 1.646355  |
| C33 | -7.277431 | -0.147912 | 1.458660  |
| C34 | -7.880828 | -0.541774 | 0.121205  |
| C35 | -7.779718 | 0.527671  | -0.976420 |
| C36 | -6.937568 | 0.138429  | -2.178544 |
| C37 | -1.583992 | 0.005399  | 1.938257  |
| N38 | 1.177361  | 0.049474  | 2.541055  |
| C39 | -0.849403 | 1.219430  | 2.087026  |
| C40 | -0.807486 | -1.184549 | 2.075587  |
| C41 | 0.520471  | -1.136133 | 2.380496  |
| C42 | 0.480223  | 1.213552  | 2.390303  |
| C43 | 2.550241  | 0.073170  | 3.044778  |
| H44 | 4.924862  | 2.662440  | -0.005521 |
| H45 | 0.238875  | 3.908479  | -0.791468 |
| H46 | 4.290217  | 5.088162  | 0.053089  |
| H47 | 1.892040  | 5.706658  | -0.352808 |
| H48 | -1.051425 | 2.192873  | -1.118008 |
| H49 | -1.083788 | -2.151785 | -1.145039 |
| H50 | 0.187944  | -3.889589 | -0.850183 |
| H51 | 4.891740  | -2.718449 | -0.056022 |
| H52 | 1.819593  | -5.716371 | -0.452153 |
| H53 | 4.227271  | -5.135884 | -0.044691 |
| H54 | -2.978659 | 2.216522  | -1.421883 |
| H55 | -3.024110 | -2.133989 | -1.531733 |
| H56 | -5.417974 | -2.004609 | -1.946568 |
| H57 | -5.374021 | 2.156865  | -1.830303 |
| H58 | -3.232418 | -2.203444 | 1.633870  |
| H59 | -5.657084 | -2.160535 | 1.430196  |
| H60 | -3.332286 | 2.151964  | 1.701277  |
| H61 | -5.753752 | 2.006692  | 1.505855  |
| H62 | -7.648554 | 0.831605  | 1.778796  |
| H63 | -7.565875 | -0.868383 | 2.232352  |
| H64 | -7.437640 | -1.491277 | -0.213305 |
| H65 | -8.935016 | -0.771696 | 0.312490  |
| H66 | -7.407694 | 1.476622  | -0.562913 |
| H67 | -8.779899 | 0.755603  | -1.361507 |

|     |           |           |           |
|-----|-----------|-----------|-----------|
| H68 | -7.069889 | 0.860970  | -2.990967 |
| H69 | -7.233661 | -0.842461 | -2.563898 |
| H70 | -1.324332 | 2.189184  | 1.973273  |
| H71 | -1.248237 | -2.169340 | 1.955281  |
| H72 | 1.118708  | -2.032389 | 2.517035  |
| H73 | 1.048248  | 2.128254  | 2.535118  |
| H74 | 3.062108  | 0.959731  | 2.661689  |
| H75 | 3.079544  | -0.815899 | 2.693358  |
| H76 | 2.550075  | 0.092972  | 4.139415  |

---

<sup>a</sup>Part of the Gaussian output file:

SCF Done: E(RM06) = -2260.22426227 A.U. after 7 cycles

|                |         |         |         |
|----------------|---------|---------|---------|
|                | 1       | 2       | 3       |
|                | A       | A       | A       |
| Frequencies -- | 23.1773 | 27.6400 | 30.1945 |
| Red. masses -- | 5.0881  | 5.7576  | 6.2610  |

|                                              |                             |
|----------------------------------------------|-----------------------------|
| Zero-point correction=                       | 0.616740 (Hartree/Particle) |
| Thermal correction to Energy=                | 0.653086                    |
| Thermal correction to Enthalpy=              | 0.654030                    |
| Thermal correction to Gibbs Free Energy=     | 0.549683                    |
| Sum of electronic and zero-point Energies=   | -2259.607522                |
| Sum of electronic and thermal Energies=      | -2259.571176                |
| Sum of electronic and thermal Enthalpies=    | -2259.570232                |
| Sum of electronic and thermal Free Energies= | -2259.674579                |

| Item          | Value    | Threshold | Converged? |
|---------------|----------|-----------|------------|
| Maximum Force | 0.000182 | 0.000450  | YES        |
| RMS Force     | 0.000023 | 0.000300  | YES        |

**Table S8.** DFT-optimized geometry of the two-electron-reduced form  $[\text{PtL}^+-\text{C3-MV}^+]^{2+}$  (closed-shell singlet), computed at the M06/SDD(Pt)/6-31G\*\*(HCNOCl) level using PCM.<sup>a</sup>

| Atom | X         | Y         | Z         |
|------|-----------|-----------|-----------|
| Pt1  | 3.518644  | 0.152132  | -0.401451 |
| N2   | 3.368293  | -1.908716 | -0.429109 |
| C3   | 2.820525  | -4.616831 | -0.404651 |
| C4   | 4.349376  | -2.791670 | -0.198962 |
| C5   | 2.088686  | -2.344811 | -0.649701 |
| C6   | 1.800995  | -3.703319 | -0.636807 |
| C7   | 4.113898  | -4.157056 | -0.182191 |
| C8   | 1.088794  | -1.288751 | -0.857644 |
| C9   | -0.497354 | 0.967654  | -1.120303 |
| C10  | -0.259098 | -1.451126 | -1.071407 |
| N11  | 1.614123  | -0.039759 | -0.796097 |
| C12  | 0.853361  | 1.082415  | -0.891982 |
| C13  | -1.101779 | -0.314111 | -1.213642 |
| C14  | 1.625376  | 2.315113  | -0.693759 |
| C15  | 3.260456  | 4.493103  | -0.250143 |
| C16  | 1.085034  | 3.595128  | -0.724334 |
| N17  | 2.961754  | 2.138076  | -0.446190 |
| C18  | 3.752185  | 3.198455  | -0.228750 |
| C19  | 1.906977  | 4.691219  | -0.502929 |
| C20  | -2.516468 | -0.451123 | -1.434934 |
| N21  | -5.309651 | -0.674383 | -1.736201 |
| C22  | -3.199464 | -1.678923 | -1.254963 |
| C23  | -3.324245 | 0.631953  | -1.876070 |
| C24  | -4.672552 | 0.493721  | -2.033995 |
| C25  | -4.555820 | -1.755915 | -1.385733 |
| Cl26 | 5.833263  | 0.374995  | 0.144824  |
| C27  | -6.775765 | -0.846138 | -1.831106 |
| C28  | -7.593892 | 0.434395  | -1.787436 |
| C29  | -7.386196 | 1.407414  | -0.626365 |
| C30  | -7.856020 | 0.987820  | 0.765198  |
| C31  | -7.164729 | -0.181607 | 1.446875  |

|     |           |           |           |
|-----|-----------|-----------|-----------|
| N32 | -5.691598 | -0.117633 | 1.488806  |
| C33 | -2.870447 | -0.101150 | 1.773946  |
| C34 | -4.996262 | 1.063337  | 1.519790  |
| C35 | -4.994035 | -1.281156 | 1.664284  |
| C36 | -3.640039 | -1.300503 | 1.806165  |
| C37 | -3.640050 | 1.095415  | 1.637194  |
| C38 | -1.457271 | -0.094767 | 1.952289  |
| N39 | 1.312529  | -0.073770 | 2.517517  |
| C40 | -0.699924 | 1.112862  | 2.046362  |
| C41 | -0.693357 | -1.292326 | 2.095383  |
| C42 | 0.639112  | -1.255866 | 2.378839  |
| C43 | 0.631150  | 1.095561  | 2.339031  |
| C44 | 2.681310  | -0.065347 | 3.029952  |
| H45 | 5.333545  | -2.363424 | -0.024908 |
| H46 | 0.783006  | -4.042961 | -0.802322 |
| H47 | 4.934191  | -4.840984 | 0.006519  |
| H48 | 2.603468  | -5.680568 | -0.393510 |
| H49 | -0.664876 | -2.454843 | -1.145484 |
| H50 | -1.106964 | 1.865813  | -1.157361 |
| H51 | 0.025415  | 3.731733  | -0.918732 |
| H52 | 4.798599  | 2.973329  | -0.036945 |
| H53 | 1.491287  | 5.693936  | -0.526463 |
| H54 | 3.932459  | 5.325212  | -0.070714 |
| H55 | -2.681090 | -2.578566 | -0.937931 |
| H56 | -2.890910 | 1.589361  | -2.144407 |
| H57 | -5.283784 | 1.301082  | -2.418329 |
| H58 | -5.100385 | -2.678057 | -1.205744 |
| H59 | -7.053154 | -1.518119 | -1.010469 |
| H60 | -6.993144 | -1.382720 | -2.762796 |
| H61 | -7.450011 | 0.981682  | -2.728611 |
| H62 | -8.643453 | 0.110599  | -1.806788 |
| H63 | -6.337795 | 1.728033  | -0.580981 |
| H64 | -7.942875 | 2.317697  | -0.880904 |
| H65 | -8.920585 | 0.719907  | 0.727640  |
| H66 | -7.807072 | 1.867736  | 1.420624  |
| H67 | -7.417350 | -1.124205 | 0.948200  |

|     |           |           |          |
|-----|-----------|-----------|----------|
| H68 | -7.535009 | -0.267868 | 2.476404 |
| H69 | -5.581689 | 1.973454  | 1.460468 |
| H70 | -5.587516 | -2.190942 | 1.688392 |
| H71 | -3.174209 | -2.270828 | 1.944661 |
| H72 | -3.170740 | 2.073853  | 1.642376 |
| H73 | -1.161813 | 2.085675  | 1.908218 |
| H74 | -1.148391 | -2.271679 | 1.979383 |
| H75 | 1.230869  | -2.156285 | 2.517347 |
| H76 | 1.213074  | 2.006162  | 2.452284 |
| H77 | 2.675990  | -0.095984 | 4.124472 |
| H78 | 3.188843  | 0.840530  | 2.689615 |
| H79 | 3.219366  | -0.934152 | 2.641857 |

---

<sup>a</sup>Part of the Gaussian output file:

SCF Done: E(RM06) = -2299.49883255 A.U. after 7 cycles

|                |         |         |         |
|----------------|---------|---------|---------|
|                | 1       | 2       | 3       |
|                | A       | A       | A       |
| Frequencies -- | 14.6111 | 27.7998 | 30.8997 |
| Red. masses -- | 5.6040  | 6.0367  | 5.4630  |

|                                              |                             |
|----------------------------------------------|-----------------------------|
| Zero-point correction=                       | 0.645880 (Hartree/Particle) |
| Thermal correction to Energy=                | 0.683155                    |
| Thermal correction to Enthalpy=              | 0.684099                    |
| Thermal correction to Gibbs Free Energy=     | 0.577899                    |
| Sum of electronic and zero-point Energies=   | -2298.852952                |
| Sum of electronic and thermal Energies=      | -2298.815678                |
| Sum of electronic and thermal Enthalpies=    | -2298.814733                |
| Sum of electronic and thermal Free Energies= | -2298.920934                |

| Item          | Value    | Threshold | Converged? |
|---------------|----------|-----------|------------|
| Maximum Force | 0.000096 | 0.000450  | YES        |
| RMS Force     | 0.000010 | 0.000300  | YES        |

**Table S9.** DFT-optimized geometry of the two-electron-reduced form  $[\text{PtL}^+-\text{C4-MV}^+]^{2+}$  (closed-shell singlet), computed at the M06/SDD(Pt)/6-31G\*\*(HCNOCl) level using PCM.<sup>a</sup>

| Atom | X         | Y         | Z         |
|------|-----------|-----------|-----------|
| Pt1  | 3.741605  | 0.307147  | -0.411423 |
| N2   | 3.067805  | 2.259041  | -0.429580 |
| C3   | 1.849366  | 4.739368  | -0.427783 |
| C4   | 3.799075  | 3.368569  | -0.254501 |
| C5   | 1.712802  | 2.350385  | -0.613761 |
| C6   | 1.089727  | 3.592450  | -0.609330 |
| C7   | 3.224580  | 4.629283  | -0.250289 |
| C8   | 1.010704  | 1.075910  | -0.793774 |
| C9   | 0.041138  | -1.514665 | -0.983604 |
| C10  | -0.334602 | 0.886350  | -1.009890 |
| N11  | 1.835105  | -0.001705 | -0.715412 |
| C12  | 1.382260  | -1.275668 | -0.803513 |
| C13  | -0.870568 | -0.422939 | -1.096930 |
| C14  | 2.453614  | -2.271430 | -0.655643 |
| C15  | 4.597433  | -3.965088 | -0.290885 |
| C16  | 2.248188  | -3.644154 | -0.660684 |
| N17  | 3.711672  | -1.761660 | -0.472358 |
| C18  | 4.751653  | -2.587176 | -0.295043 |
| C19  | 3.327704  | -4.498664 | -0.476877 |
| C20  | -2.279094 | -0.639525 | -1.275827 |
| N21  | -5.057577 | -1.058781 | -1.599886 |
| C22  | -3.169630 | 0.397696  | -1.673102 |
| C23  | -2.881064 | -1.910941 | -1.097583 |
| C24  | -4.227749 | -2.080258 | -1.230673 |
| C25  | -4.506230 | 0.169174  | -1.819423 |
| Cl26 | 6.068699  | 0.678885  | -0.043980 |
| C27  | -3.715831 | -1.097424 | 1.925754  |
| C28  | -4.627478 | 1.462180  | 1.565180  |
| C29  | -2.744129 | -0.054321 | 1.852759  |
| C30  | -5.051485 | -0.831537 | 1.845693  |
| N31  | -5.527693 | 0.436370  | 1.665010  |
| C32  | -3.284917 | 1.252063  | 1.660206  |



|     |           |           |           |
|-----|-----------|-----------|-----------|
| C33 | -1.347679 | -0.286679 | 2.024709  |
| N34 | 1.402869  | -0.739410 | 2.494631  |
| C35 | -0.403269 | 0.780449  | 2.161548  |
| C36 | -0.792931 | -1.594229 | 2.124040  |
| C37 | 0.539206  | -1.789554 | 2.340777  |
| C38 | 0.912772  | 0.532738  | 2.408483  |
| C39 | 2.784868  | -0.982525 | 2.902522  |
| C40 | -6.505306 | -1.283035 | -1.400735 |
| C41 | -7.493846 | -0.352361 | -2.101787 |
| C42 | -7.256885 | 1.560215  | 0.267750  |
| C43 | -6.969251 | 0.690385  | 1.492681  |
| C44 | -8.694839 | -0.047112 | -1.192690 |
| C45 | -8.587082 | 1.276756  | -0.426080 |
| H46 | 4.865901  | 3.209957  | -0.116131 |
| H47 | 0.014460  | 3.659248  | -0.745367 |
| H48 | 3.850163  | 5.503293  | -0.106191 |
| H49 | 1.369245  | 5.713203  | -0.423801 |
| H50 | -0.987259 | 1.753322  | -1.053587 |
| H51 | -0.307616 | -2.537999 | -1.074384 |
| H52 | 1.247794  | -4.042379 | -0.800226 |
| H53 | 5.715300  | -2.104114 | -0.151584 |
| H54 | 3.175362  | -5.573526 | -0.476141 |
| H55 | 5.463390  | -4.600567 | -0.141132 |
| H56 | -2.810657 | 1.394773  | -1.904792 |
| H57 | -2.303465 | -2.777734 | -0.793568 |
| H58 | -4.707007 | -3.036991 | -1.047075 |
| H59 | -5.174106 | 0.958017  | -2.143444 |
| H60 | -3.429013 | -2.130895 | 2.090579  |
| H61 | -5.798964 | -1.614401 | 1.939659  |
| H62 | -2.642939 | 2.122733  | 1.574769  |
| H63 | -5.043572 | 2.453651  | 1.420727  |
| H64 | -0.709167 | 1.820844  | 2.109694  |
| H65 | -1.408548 | -2.481367 | 2.014615  |
| H66 | 0.976895  | -2.780329 | 2.420984  |
| H67 | 1.639716  | 1.328974  | 2.544333  |
| H68 | 3.411897  | -0.156750 | 2.557348  |
| H69 | 3.143166  | -1.908918 | 2.443439  |
| H70 | 2.852981  | -1.072624 | 3.991449  |

|     |           |           |           |
|-----|-----------|-----------|-----------|
| H71 | -6.700336 | -2.318648 | -1.696795 |
| H72 | -7.827052 | -0.829125 | -3.028960 |
| H73 | -6.439939 | 1.438446  | -0.456166 |
| H74 | -7.451640 | -0.289822 | 1.405372  |
| H75 | -7.361000 | 1.151499  | 2.406939  |
| H76 | -7.232903 | 2.617480  | 0.556964  |
| H77 | -7.032953 | 0.592264  | -2.414529 |
| H78 | -8.853130 | -0.888531 | -0.501850 |
| H79 | -9.607723 | -0.002459 | -1.797428 |
| H80 | -9.408022 | 1.341255  | 0.301398  |
| H81 | -6.661563 | -1.250127 | -0.313313 |
| H82 | -8.753347 | 2.094761  | -1.140162 |

---

<sup>a</sup>Part of the Gaussian output file:

SCF Done: E(RM06) = -2338.77328990 A.U. after 6 cycles

|                |         |         |         |
|----------------|---------|---------|---------|
|                | 1       | 2       | 3       |
|                | A       | A       | A       |
| Frequencies -- | 27.3203 | 32.0528 | 38.6737 |
| Red. masses -- | 5.9362  | 7.4036  | 6.1691  |

|                                              |                             |
|----------------------------------------------|-----------------------------|
| Zero-point correction=                       | 0.675834 (Hartree/Particle) |
| Thermal correction to Energy=                | 0.713981                    |
| Thermal correction to Enthalpy=              | 0.714925                    |
| Thermal correction to Gibbs Free Energy=     | 0.607882                    |
| Sum of electronic and zero-point Energies=   | -2338.097456                |
| Sum of electronic and thermal Energies=      | -2338.059309                |
| Sum of electronic and thermal Enthalpies=    | -2338.058365                |
| Sum of electronic and thermal Free Energies= | -2338.165408                |

| Item          | Value    | Threshold | Converged? |
|---------------|----------|-----------|------------|
| Maximum Force | 0.000128 | 0.000450  | YES        |
| RMS Force     | 0.000016 | 0.000300  | YES        |

**Table S10.** DFT-optimized geometry of the two-electron-reduced form **HT-[PtL<sup>+</sup>-C1-MV<sup>+</sup>]<sub>2</sub><sup>4+</sup>** (closed-shell singlet), computed at the M06/SDD(Pt)/6-31G\*\*(HCNOCl) level using PCM.<sup>a</sup>

| Atom | X          | Y         | Z         |
|------|------------|-----------|-----------|
| Pt1  | -10.986140 | 0.884054  | -0.383090 |
| N2   | -11.229084 | -1.033289 | 0.350854  |
| C3   | -11.212150 | -3.617880 | 1.328744  |
| C4   | -12.340521 | -1.558856 | 0.883771  |
| C5   | -10.080185 | -1.777038 | 0.285187  |
| C6   | -10.059040 | -3.075633 | 0.778360  |
| C7   | -12.371275 | -2.851674 | 1.381268  |
| C8   | -8.923242  | -1.102805 | -0.316191 |
| C9   | -6.975936  | 0.518313  | -1.431132 |
| C10  | -7.662838  | -1.618798 | -0.505260 |
| N11  | -9.191708  | 0.174268  | -0.693431 |
| C12  | -8.251325  | 0.987862  | -1.231477 |
| C13  | -6.633058  | -0.815714 | -1.063751 |
| C14  | -8.756333  | 2.339793  | -1.508656 |
| C15  | -9.893165  | 4.820987  | -1.898136 |
| C16  | -7.985363  | 3.370909  | -2.028524 |
| N17  | -10.071601 | 2.553706  | -1.190786 |
| C18  | -10.620569 | 3.761132  | -1.379381 |
| C19  | -8.557554  | 4.620498  | -2.226869 |
| C20  | -5.303578  | -1.322865 | -1.261511 |
| N21  | -2.730762  | -2.340545 | -1.829809 |
| C22  | -4.952394  | -2.683197 | -1.033975 |
| C23  | -4.244166  | -0.503492 | -1.736451 |
| C24  | -3.011871  | -1.018109 | -2.013756 |
| C25  | -3.704037  | -3.150769 | -1.320030 |
| Cl26 | -13.168603 | 1.764169  | 0.008921  |
| N27  | 2.250224   | -2.066679 | -1.832511 |
| C28  | 4.708503   | -0.662496 | -1.747746 |
| C29  | 2.298514   | -0.767931 | -1.407329 |
| C30  | 3.428961   | -2.693759 | -2.138132 |
| C31  | 4.621833   | -2.039946 | -2.108576 |

|      |           |           |           |
|------|-----------|-----------|-----------|
| C32  | 3.468802  | -0.072740 | -1.353238 |
| C33  | 5.921806  | 0.077800  | -1.843136 |
| N34  | 8.291873  | 1.582634  | -2.164852 |
| C35  | 6.024255  | 1.441019  | -1.441374 |
| C36  | 7.119391  | -0.479500 | -2.389664 |
| C37  | 8.242964  | 0.273436  | -2.548612 |
| C38  | 7.178755  | 2.147710  | -1.608659 |
| C39  | 9.451923  | 2.407210  | -2.500282 |
| C40  | -1.445700 | -2.913993 | -2.252776 |
| C41  | -0.258226 | -2.019896 | -1.923021 |
| C42  | 1.011132  | -2.849018 | -1.943490 |
| Pt43 | 10.986248 | 0.883833  | 0.381980  |
| N44  | 11.228363 | -1.033671 | -0.351773 |
| C45  | 11.210246 | -3.618349 | -1.329419 |
| C46  | 12.339419 | -1.559614 | -0.885133 |
| C47  | 10.079291 | -1.777103 | -0.285482 |
| C48  | 10.057544 | -3.075727 | -0.778562 |
| C49  | 12.369580 | -2.852487 | -1.382512 |
| C50  | 8.922791  | -1.102469 | 0.316292  |
| C51  | 6.976137  | 0.519602  | 1.431049  |
| C52  | 7.662329  | -1.618091 | 0.505969  |
| N53  | 9.191743  | 0.174608  | 0.693202  |
| C54  | 8.251700  | 0.988615  | 1.231217  |
| C55  | 6.632843  | -0.814484 | 1.064248  |
| C56  | 8.757329  | 2.340303  | 1.508404  |
| C57  | 9.895541  | 4.820719  | 1.898778  |
| C58  | 7.987086  | 3.371507  | 2.029167  |
| N59  | 10.072559 | 2.553757  | 1.190049  |
| C60  | 10.622177 | 3.760825  | 1.379026  |
| C61  | 8.559990  | 4.620694  | 2.228017  |
| C62  | 5.303265  | -1.321188 | 1.262440  |
| N63  | 2.730399  | -2.338278 | 1.831652  |
| C64  | 4.952062  | -2.681710 | 1.036142  |
| C65  | 4.243804  | -0.501338 | 1.736451  |
| C66  | 3.011436  | -1.015661 | 2.014194  |
| C67  | 3.703756  | -3.148991 | 1.322727  |

|      |            |           |           |
|------|------------|-----------|-----------|
| CI68 | 13.168570  | 1.763633  | -0.011419 |
| N69  | -2.250028  | -2.065085 | 1.833924  |
| C70  | -4.708640  | -0.661517 | 1.747859  |
| C71  | -2.298562  | -0.766579 | 1.407876  |
| C72  | -3.428712  | -2.692309 | 2.139479  |
| C73  | -4.621739  | -2.038798 | 2.109282  |
| C74  | -3.468998  | -0.071727 | 1.353151  |
| C75  | -5.922014  | 0.078661  | 1.843044  |
| N76  | -8.292207  | 1.583396  | 2.164404  |
| C77  | -6.024549  | 1.441815  | 1.441066  |
| C78  | -7.119579  | -0.478612 | 2.389648  |
| C79  | -8.243191  | 0.274287  | 2.548469  |
| C80  | -7.179088  | 2.148462  | 1.608220  |
| C81  | -9.452298  | 2.407942  | 2.499744  |
| C82  | 1.445915   | -2.912075 | 2.255645  |
| C83  | 0.258336   | -2.017071 | 1.928475  |
| C84  | -1.010755  | -2.846887 | 1.945185  |
| H85  | -13.209178 | -0.905020 | 0.898448  |
| H86  | -9.144330  | -3.658556 | 0.730494  |
| H87  | -13.291409 | -3.242115 | 1.802438  |
| H88  | -11.204064 | -4.632893 | 1.714035  |
| H89  | -7.458875  | -2.634978 | -0.183070 |
| H90  | -6.239768  | 1.177273  | -1.878520 |
| H91  | -6.941164  | 3.197998  | -2.270897 |
| H92  | -11.667210 | 3.850131  | -1.098523 |
| H93  | -7.961519  | 5.432262  | -2.632345 |
| H94  | -10.372766 | 5.784030  | -2.035867 |
| H95  | -5.665694  | -3.402245 | -0.645569 |
| H96  | -4.375023  | 0.562128  | -1.890767 |
| H97  | -2.211610  | -0.398481 | -2.402111 |
| H98  | -3.428497  | -4.189313 | -1.165682 |
| H99  | 1.357412   | -0.301600 | -1.137098 |
| H100 | 3.348405   | -3.738650 | -2.422021 |
| H101 | 5.504383   | -2.613955 | -2.373174 |
| H102 | 3.410459   | 0.960649  | -1.028398 |
| H103 | 5.192674   | 1.957378  | -0.971355 |

|      |            |           |           |
|------|------------|-----------|-----------|
| H104 | 7.168580   | -1.512104 | -2.720378 |
| H105 | 9.153717   | -0.126448 | -2.985577 |
| H106 | 7.268897   | 3.190686  | -1.318738 |
| H107 | 9.337615   | 2.834717  | -3.501701 |
| H108 | 9.545679   | 3.215203  | -1.770638 |
| H109 | 10.355895  | 1.793872  | -2.457369 |
| H110 | -1.484792  | -3.121787 | -3.329224 |
| H111 | -0.990384  | -3.591417 | 1.135219  |
| H112 | -0.174897  | -1.198703 | -2.645948 |
| H113 | -0.418394  | -1.568868 | -0.933257 |
| H114 | 1.068983   | -3.406699 | -2.886764 |
| H115 | 0.993561   | -3.595264 | -1.135020 |
| H116 | 13.208252  | -0.906023 | -0.900277 |
| H117 | 9.142668   | -3.658358 | -0.730296 |
| H118 | 13.289413  | -3.243231 | -1.804058 |
| H119 | 11.201683  | -4.633380 | -1.714653 |
| H120 | 7.458081   | -2.634347 | 0.184212  |
| H121 | 6.240209   | 1.178897  | 1.878349  |
| H122 | 6.942944   | 3.198939  | 2.272024  |
| H123 | 11.668739  | 3.849475  | 1.097764  |
| H124 | 7.964572   | 5.432485  | 2.634344  |
| H125 | 10.375685  | 5.783436  | 2.036893  |
| H126 | 5.665364   | -3.401109 | 0.648392  |
| H127 | 4.374692   | 0.564442  | 1.889656  |
| H128 | 2.211140   | -0.395663 | 2.401918  |
| H129 | 3.428250   | -4.187704 | 1.169500  |
| H130 | -1.357489  | -0.300304 | 1.137438  |
| H131 | -3.348005  | -3.737056 | 2.423841  |
| H132 | -5.504216  | -2.612900 | 2.373933  |
| H133 | -3.410846  | 0.961474  | 1.027681  |
| H134 | -5.192980  | 1.958151  | 0.971015  |
| H135 | -7.168660  | -1.511135 | 2.720622  |
| H136 | -9.153882  | -0.125527 | 2.985627  |
| H137 | -7.269231  | 3.191417  | 1.318230  |
| H138 | -10.356346 | 1.794748  | 2.456177  |
| H139 | -9.545647  | 3.216247  | 1.770402  |

|      |           |           |           |
|------|-----------|-----------|-----------|
| H140 | -9.338352 | 2.835014  | 3.501388  |
| H141 | 1.349293  | -3.875641 | 1.742025  |
| H142 | 1.485778  | -3.121727 | 3.331693  |
| H143 | 0.419218  | -1.563512 | 0.940009  |
| H144 | 0.174473  | -1.197891 | 2.653604  |
| H145 | -1.350553 | -3.878476 | -1.740624 |
| H146 | -1.069761 | -3.406775 | 2.887060  |

---

<sup>a</sup>Part of the Gaussian output file:

SCF Done: E(RM06) = -4441.87339054 A.U. after 6 cycles

|                |         |         |         |
|----------------|---------|---------|---------|
|                | 1       | 2       | 3       |
|                | A       | A       | A       |
| Frequencies -- | 10.9912 | 16.4076 | 17.6127 |
| Red. masses -- | 8.3708  | 6.4531  | 7.3756  |

Zero-point correction= 1.182511 (Hartree/Particle)  
Thermal correction to Energy= 1.253438  
Thermal correction to Enthalpy= 1.254382  
Thermal correction to Gibbs Free Energy= 1.076916  
Sum of electronic and zero-point Energies= -4440.690879  
Sum of electronic and thermal Energies= -4440.619953  
Sum of electronic and thermal Enthalpies= -4440.619008  
Sum of electronic and thermal Free Energies= -4440.796475

| Item          | Value    | Threshold | Converged? |
|---------------|----------|-----------|------------|
| Maximum Force | 0.000339 | 0.000450  | YES        |
| RMS Force     | 0.000039 | 0.000300  | YES        |

**Table S11.** DFT-optimized geometry of the two-electron-reduced form **HH( $\sigma$ )-[PtL<sup>+</sup>-C1-MV<sup>+</sup>]<sub>2</sub><sup>4+</sup>** (closed-shell singlet), computed at the M06/SDD(Pt)/6-31G\*\*(HCNOCl) level using PCM.<sup>a</sup>

| Atom | X         | Y         | Z         |
|------|-----------|-----------|-----------|
| Pt1  | 6.353801  | -0.273296 | -1.468929 |
| N2   | 6.398273  | -2.279014 | -0.960101 |
| C3   | 6.119433  | -4.942650 | -0.271455 |
| C4   | 7.482101  | -3.030262 | -0.718635 |
| C5   | 5.146682  | -2.830715 | -0.868660 |
| C6   | 4.995038  | -4.167631 | -0.520220 |
| C7   | 7.382251  | -4.368343 | -0.372417 |
| C8   | 4.033212  | -1.926094 | -1.175817 |
| C9   | 2.223302  | 0.048030  | -1.893506 |
| C10  | 2.694446  | -2.236246 | -1.209553 |
| N11  | 4.439641  | -0.667388 | -1.490175 |
| C12  | 3.572373  | 0.310106  | -1.855111 |
| C13  | 1.732125  | -1.253763 | -1.570044 |
| C14  | 4.246684  | 1.576558  | -2.170780 |
| C15  | 5.702256  | 3.866383  | -2.664461 |
| C16  | 3.587266  | 2.736851  | -2.558588 |
| N17  | 5.610464  | 1.567424  | -2.044726 |
| C18  | 6.315166  | 2.681098  | -2.288571 |
| C19  | 4.318174  | 3.891534  | -2.803810 |
| C20  | 0.334738  | -1.574390 | -1.646984 |
| N21  | -2.389177 | -2.250099 | -1.983250 |
| C22  | -0.150690 | -2.903299 | -1.485606 |
| C23  | -0.665528 | -0.605063 | -1.934919 |
| C24  | -1.974719 | -0.956065 | -2.102117 |
| C25  | -1.466685 | -3.204562 | -1.657974 |
| Cl26 | 8.704261  | 0.160473  | -1.569445 |
| N27  | -7.334247 | -1.504648 | -1.760445 |
| C28  | -9.716507 | 0.001265  | -1.525764 |
| C29  | -7.286635 | -0.161663 | -1.515643 |
| C30  | -8.560224 | -2.114308 | -1.820061 |
| C31  | -9.719612 | -1.412440 | -1.714086 |



|     |            |           |           |
|-----|------------|-----------|-----------|
| C32 | -8.421467  | 0.584404  | -1.400388 |
| C33 | -10.913446 | 0.777260  | -1.528119 |
| N34 | -13.273303 | 2.321393  | -1.619603 |
| C35 | -10.906383 | 2.195313  | -1.387745 |
| C36 | -12.202154 | 0.196490  | -1.708984 |
| C37 | -13.326867 | 0.963196  | -1.752920 |
| C38 | -12.059989 | 2.919556  | -1.440423 |
| C39 | -14.477659 | 3.126739  | -1.801790 |
| C40 | -3.756786  | -2.680439 | -2.304060 |
| C41 | -4.827791  | -1.636123 | -2.025719 |
| C42 | -6.151500  | -2.363841 | -1.889082 |
| H43 | 8.438683   | -2.520500 | -0.811049 |
| H44 | 4.000652   | -4.597623 | -0.443058 |
| H45 | 8.283410   | -4.941492 | -0.183016 |
| H46 | 6.009008   | -5.987922 | 0.000756  |
| H47 | 2.387201   | -3.243377 | -0.944813 |
| H48 | 1.543494   | 0.834855  | -2.204834 |
| H49 | 2.505556   | 2.738069  | -2.657354 |
| H50 | 7.392401   | 2.593159  | -2.169407 |
| H51 | 3.808452   | 4.804705  | -3.097349 |
| H52 | 6.306519   | 4.748448  | -2.847047 |
| H53 | 0.509152   | -3.728084 | -1.240634 |
| H54 | -0.427730  | 0.449853  | -2.027556 |
| H55 | -2.732490  | -0.219565 | -2.344778 |
| H56 | -1.844995  | -4.216960 | -1.554523 |
| H57 | -6.304553  | 0.289688  | -1.429244 |
| H58 | -8.545164  | -3.189319 | -1.972021 |
| H59 | -10.644752 | -1.975489 | -1.781822 |
| H60 | -8.291099  | 1.645883  | -1.219141 |
| H61 | -9.984096  | 2.745592  | -1.234284 |
| H62 | -12.332267 | -0.874918 | -1.816882 |
| H63 | -14.316408 | 0.538861  | -1.894048 |
| H64 | -12.072260 | 4.000816  | -1.346319 |
| H65 | -14.645114 | 3.329489  | -2.864057 |
| H66 | -14.365707 | 4.074148  | -1.270602 |
| H67 | -15.341711 | 2.590687  | -1.401922 |

|      |           |           |           |
|------|-----------|-----------|-----------|
| H68  | -3.790239 | -2.989119 | -3.356458 |
| H69  | -3.946298 | -3.576980 | -1.701346 |
| H70  | -4.877076 | -0.899218 | -2.836980 |
| H71  | -4.585005 | -1.095396 | -1.099909 |
| H72  | -6.312445 | -3.004809 | -2.765524 |
| H73  | -6.117622 | -3.031795 | -1.014225 |
| Pt74 | 5.610421  | 1.596438  | 1.556550  |
| N75  | 6.156524  | -0.315817 | 2.116414  |
| C76  | 6.581426  | -2.950681 | 2.830538  |
| C77  | 7.396695  | -0.749668 | 2.377583  |
| C78  | 5.094143  | -1.177702 | 2.189707  |
| C79  | 5.296243  | -2.503941 | 2.553306  |
| C80  | 7.650022  | -2.064594 | 2.735376  |
| C81  | 3.788149  | -0.601669 | 1.838252  |
| C82  | 1.543852  | 0.854327  | 1.122922  |
| C83  | 2.569443  | -1.238624 | 1.811695  |
| N84  | 3.869994  | 0.711615  | 1.505690  |
| C85  | 2.783113  | 1.446509  | 1.152009  |
| C86  | 1.388839  | -0.519196 | 1.454936  |
| C87  | 3.103084  | 2.850101  | 0.867644  |
| C88  | 3.920691  | 5.443357  | 0.401218  |
| C89  | 2.169648  | 3.803597  | 0.478044  |
| N90  | 4.422025  | 3.194830  | 1.012540  |
| C91  | 4.814740  | 4.456373  | 0.784276  |
| C92  | 2.579552  | 5.109079  | 0.244523  |
| C93  | 0.090219  | -1.131318 | 1.470238  |
| N94  | -2.488732 | -2.273217 | 1.705751  |
| C95  | -0.112781 | -2.516795 | 1.719002  |
| C96  | -1.104444 | -0.380967 | 1.284571  |
| C97  | -2.335817 | -0.951135 | 1.412873  |
| C98  | -1.366320 | -3.044671 | 1.825432  |
| Cl99 | 7.720141  | 2.708962  | 1.704186  |
| N100 | -7.462873 | -1.886197 | 1.830255  |
| C101 | -9.872167 | -0.420361 | 1.583384  |
| C102 | -7.464099 | -0.522467 | 1.919099  |
| C103 | -8.647845 | -2.521864 | 1.573745  |

|      |            |           |           |
|------|------------|-----------|-----------|
| C104 | -9.819743  | -1.838790 | 1.449031  |
| C105 | -8.609372  | 0.204154  | 1.789394  |
| C106 | -11.095086 | 0.315156  | 1.560377  |
| N107 | -13.516443 | 1.760629  | 1.624467  |
| C108 | -11.137875 | 1.730100  | 1.733508  |
| C109 | -12.364951 | -0.314877 | 1.418751  |
| C110 | -13.520921 | 0.405439  | 1.450928  |
| C111 | -12.320364 | 2.404925  | 1.760934  |
| C112 | -14.775223 | 2.485762  | 1.762368  |
| C113 | -3.798156  | -2.928418 | 1.883002  |
| C114 | -4.967930  | -1.965798 | 1.848735  |
| C115 | -6.269657  | -2.703300 | 2.105324  |
| H116 | 8.183653   | -0.004569 | 2.286826  |
| H117 | 4.452486   | -3.185745 | 2.612265  |
| H118 | 8.668273   | -2.379396 | 2.937215  |
| H119 | 6.746895   | -3.986658 | 3.111910  |
| H120 | 2.518355   | -2.285929 | 2.093571  |
| H121 | 0.689152   | 1.455213  | 0.830642  |
| H122 | 1.127087   | 3.524387  | 0.357180  |
| H123 | 5.876682   | 4.649018  | 0.920040  |
| H124 | 1.855770   | 5.858890  | -0.060090 |
| H125 | 4.279083   | 6.452023  | 0.226233  |
| H126 | 0.720448   | -3.204289 | 1.825090  |
| H127 | -1.087856  | 0.681599  | 1.071210  |
| H128 | -3.234369  | -0.357297 | 1.299643  |
| H129 | -1.536028  | -4.099108 | 2.021713  |
| H130 | -6.512592  | -0.038582 | 2.102202  |
| H131 | -8.596453  | -3.602942 | 1.487405  |
| H132 | -10.710704 | -2.423552 | 1.245008  |
| H133 | -8.516198  | 1.281727  | 1.869838  |
| H134 | -10.231888 | 2.317736  | 1.837169  |
| H135 | -12.454158 | -1.386553 | 1.275054  |
| H136 | -14.498203 | -0.056183 | 1.347046  |
| H137 | -12.372583 | 3.481409  | 1.892223  |
| H138 | -14.620245 | 3.533281  | 1.495600  |
| H139 | -15.143566 | 2.428142  | 2.791202  |

|      |            |           |          |
|------|------------|-----------|----------|
| H140 | -15.521553 | 2.052641  | 1.091305 |
| H141 | -3.899354  | -3.694091 | 1.100471 |
| H142 | -3.771217  | -3.454353 | 2.845546 |
| H143 | -5.024536  | -1.472693 | 0.868103 |
| H144 | -4.817994  | -1.186626 | 2.606648 |
| H145 | -6.337556  | -3.590053 | 1.462054 |
| H146 | -6.313736  | -3.054705 | 3.144106 |

---

<sup>a</sup>Part of the Gaussian output file:

SCF Done: E(RM06) = -4441.88394442 A.U. after 7 cycles

|                |         |         |         |
|----------------|---------|---------|---------|
|                | 1       | 2       | 3       |
|                | A       | A       | A       |
| Frequencies -- | 14.5135 | 17.1914 | 25.4146 |
| Red. masses -- | 6.5746  | 6.4069  | 7.3326  |

Zero-point correction= 1.180751 (Hartree/Particle)  
Thermal correction to Energy= 1.251809  
Thermal correction to Enthalpy= 1.252754  
Thermal correction to Gibbs Free Energy= 1.077131  
Sum of electronic and zero-point Energies= -4440.703193  
Sum of electronic and thermal Energies= -4440.632135  
Sum of electronic and thermal Enthalpies= -4440.631191  
Sum of electronic and thermal Free Energies= -4440.806814

| Item          | Value    | Threshold | Converged? |
|---------------|----------|-----------|------------|
| Maximum Force | 0.000245 | 0.000450  | YES        |
| RMS Force     | 0.000032 | 0.000300  | YES        |

**Table S12.** DFT-optimized geometry of the two-electron-reduced form **HH(C<sub>2</sub>)-[PtL<sup>+</sup>-C1-MV<sup>+</sup>]<sub>2</sub><sup>4+</sup>** (closed-shell singlet), computed at the M06/SDD(Pt)/6-31G\*\*(HCNOCl) level using PCM.<sup>a</sup>

| Atom | X         | Y         | Z         |
|------|-----------|-----------|-----------|
| Pt1  | -5.890889 | -1.639430 | 1.438801  |
| N2   | -6.227569 | 0.191028  | 2.334253  |
| C3   | -6.362942 | 2.699883  | 3.484553  |
| C4   | -7.398224 | 0.665532  | 2.777010  |
| C5   | -5.091003 | 0.947770  | 2.446670  |
| C6   | -5.147277 | 2.210069  | 3.023047  |
| C7   | -7.506460 | 1.919630  | 3.359541  |
| C8   | -3.866059 | 0.330100  | 1.916429  |
| C9   | -1.789768 | -1.195135 | 0.892373  |
| C10  | -2.603394 | 0.873278  | 1.875271  |
| N11  | -4.077637 | -0.911170 | 1.415844  |
| C12  | -3.076650 | -1.682512 | 0.911228  |
| C13  | -1.511205 | 0.115845  | 1.353382  |
| C14  | -3.540540 | -2.991769 | 0.440390  |
| C15  | -4.622530 | -5.399608 | -0.361779 |
| C16  | -2.717605 | -3.956962 | -0.129080 |
| N17  | -4.881900 | -3.231209 | 0.591178  |
| C18  | -5.403860 | -4.401762 | 0.198269  |
| C19  | -3.260373 | -5.170228 | -0.528986 |
| C20  | -0.190809 | 0.676381  | 1.286507  |
| N21  | 2.408113  | 1.782683  | 1.274147  |
| C22  | 0.053470  | 2.058209  | 1.524565  |
| C23  | 0.969231  | -0.101084 | 1.018018  |
| C24  | 2.211839  | 0.459182  | 1.000539  |
| C25  | 1.315802  | 2.569797  | 1.498719  |
| Cl26 | -8.086679 | -2.568941 | 1.547814  |
| N27  | 7.389927  | 1.511278  | 1.436448  |
| C28  | 9.842702  | 0.122153  | 1.620150  |
| C29  | 7.425405  | 0.148697  | 1.352448  |
| C30  | 8.572515  | 2.189689  | 1.553451  |
| C31  | 9.764480  | 1.543015  | 1.662954  |

|      |           |           |           |
|------|-----------|-----------|-----------|
| C32  | 8.594737  | -0.544505 | 1.445348  |
| C33  | 11.075346 | -0.577086 | 1.799475  |
| N34  | 13.506003 | -1.949823 | 2.185271  |
| C35  | 11.183231 | -1.986749 | 1.658081  |
| C36  | 12.284564 | 0.091523  | 2.155628  |
| C37  | 13.445575 | -0.598415 | 2.343470  |
| C38  | 12.373598 | -2.627983 | 1.835006  |
| C39  | 14.745759 | -2.691697 | 2.397844  |
| C40  | 3.714469  | 2.440611  | 1.154625  |
| C41  | 4.891322  | 1.512340  | 1.370087  |
| C42  | 6.171742  | 2.312433  | 1.271737  |
| Pt43 | -6.353533 | 0.829889  | -1.202174 |
| N44  | -6.033392 | -1.013580 | -2.083993 |
| C45  | -5.288469 | -3.406986 | -3.247052 |
| C46  | -6.961147 | -1.931034 | -2.387392 |
| C47  | -4.711508 | -1.258587 | -2.344241 |
| C48  | -4.325758 | -2.455452 | -2.935944 |
| C49  | -6.625726 | -3.145065 | -2.966682 |
| C50  | -3.781069 | -0.192500 | -1.947536 |
| C51  | -2.381623 | 2.068644  | -1.161341 |
| C52  | -2.411969 | -0.189090 | -2.070921 |
| N53  | -4.410254 | 0.875216  | -1.398770 |
| C54  | -3.742981 | 1.992536  | -0.990762 |
| C55  | -1.657975 | 0.959504  | -1.677514 |
| C56  | -4.628225 | 3.009824  | -0.415348 |
| C57  | -6.474447 | 4.791787  | 0.602020  |
| C58  | -4.193246 | 4.215724  | 0.124350  |
| N59  | -5.965078 | 2.702621  | -0.425028 |
| C60  | -6.858027 | 3.571923  | 0.069979  |
| C61  | -5.120454 | 5.113449  | 0.633431  |
| C62  | -0.234051 | 1.001610  | -1.854296 |
| N63  | 2.492083  | 1.114213  | -2.567252 |
| C64  | 0.522037  | -0.161319 | -2.169765 |
| C65  | 0.522776  | 2.205832  | -1.779004 |
| C66  | 1.836754  | 2.237803  | -2.150362 |
| C67  | 1.840078  | -0.082413 | -2.515230 |

|      |           |           |           |
|------|-----------|-----------|-----------|
| CI68 | -8.734269 | 0.812294  | -1.006006 |
| N69  | 7.495412  | 0.717949  | -2.302881 |
| C70  | 10.125812 | 0.132957  | -1.453124 |
| C71  | 8.362080  | 1.724670  | -1.976027 |
| C72  | 7.887743  | -0.575913 | -2.095264 |
| C73  | 9.148416  | -0.881402 | -1.678575 |
| C74  | 9.629472  | 1.469959  | -1.543381 |
| C75  | 11.501146 | -0.169612 | -1.227228 |
| N76  | 14.243299 | -0.769448 | -0.917715 |
| C77  | 12.474912 | 0.830904  | -0.940581 |
| C78  | 12.017548 | -1.496899 | -1.347330 |
| C79  | 13.346237 | -1.757662 | -1.201150 |
| C80  | 13.789591 | 0.514157  | -0.779265 |
| C81  | 15.672888 | -1.037082 | -0.804466 |
| C82  | 3.819779  | 1.201979  | -3.188309 |
| C83  | 4.983617  | 0.936537  | -2.243965 |
| C84  | 6.268546  | 0.996422  | -3.057240 |
| H85  | -8.251331 | 0.002668  | 2.655791  |
| H86  | -4.243263 | 2.804090  | 3.120159  |
| H87  | -8.472441 | 2.268140  | 3.708683  |
| H88  | -6.414161 | 3.686249  | 3.936510  |
| H89  | -2.437852 | 1.859633  | 2.297143  |
| H90  | -1.000568 | -1.816811 | 0.479848  |
| H91  | -1.657593 | -3.757690 | -0.257820 |
| H92  | -6.475872 | -4.509846 | 0.346697  |
| H93  | -2.622906 | -5.930027 | -0.970689 |
| H94  | -5.082444 | -6.333805 | -0.665537 |
| H95  | -0.754107 | 2.757995  | 1.712998  |
| H96  | 0.911113  | -1.168828 | 0.834863  |
| H97  | 3.091399  | -0.138651 | 0.793336  |
| H98  | 1.514503  | 3.623853  | 1.666103  |
| H99  | 6.479668  | -0.366509 | 1.235412  |
| H100 | 8.496533  | 3.272511  | 1.575333  |
| H101 | 10.650540 | 2.159782  | 1.767437  |
| H102 | 8.529745  | -1.626299 | 1.400959  |
| H103 | 10.330407 | -2.597497 | 1.379786  |

|      |           |           |           |
|------|-----------|-----------|-----------|
| H104 | 12.316988 | 1.162833  | 2.319220  |
| H105 | 14.370321 | -0.107523 | 2.631615  |
| H106 | 12.482183 | -3.701838 | 1.718721  |
| H107 | 15.524895 | -2.006636 | 2.733958  |
| H108 | 14.594559 | -3.459388 | 3.161079  |
| H109 | 15.061261 | -3.172439 | 1.465854  |
| H110 | 3.734444  | 3.249477  | 1.893393  |
| H111 | 3.771812  | 2.914328  | 0.160868  |
| H112 | 4.814525  | 1.021846  | 2.349439  |
| H113 | 4.895238  | 0.729886  | 0.602295  |
| H114 | 6.189315  | 3.094182  | 2.040709  |
| H115 | 6.231847  | 2.820749  | 0.295885  |
| H116 | -7.985966 | -1.660477 | -2.143709 |
| H117 | -3.277408 | -2.643083 | -3.148948 |
| H118 | -7.404712 | -3.865188 | -3.192908 |
| H119 | -4.993574 | -4.347750 | -3.702937 |
| H120 | -1.919948 | -1.042522 | -2.527475 |
| H121 | -1.863617 | 2.973743  | -0.858657 |
| H122 | -3.131518 | 4.444341  | 0.152801  |
| H123 | -7.897074 | 3.252696  | 0.028125  |
| H124 | -4.786852 | 6.057150  | 1.054320  |
| H125 | -7.227503 | 5.468211  | 0.991852  |
| H126 | 0.074442  | -1.150221 | -2.163723 |
| H127 | 0.063693  | 3.151499  | -1.510479 |
| H128 | 2.405269  | 3.163021  | -2.184696 |
| H129 | 2.419912  | -0.956031 | -2.798423 |
| H130 | 7.989218  | 2.735658  | -2.114588 |
| H131 | 7.148140  | -1.339245 | -2.319015 |
| H132 | 9.382378  | -1.933716 | -1.551538 |
| H133 | 10.260466 | 2.327215  | -1.334304 |
| H134 | 12.198072 | 1.873038  | -0.814526 |
| H135 | 11.373383 | -2.335448 | -1.587842 |
| H136 | 13.755119 | -2.758163 | -1.308675 |
| H137 | 14.545117 | 1.259250  | -0.549238 |
| H138 | 16.051344 | -0.647106 | 0.145945  |
| H139 | 16.215005 | -0.559108 | -1.625564 |



|      |           |           |           |
|------|-----------|-----------|-----------|
| H140 | 15.847018 | -2.113412 | -0.845093 |
| H141 | 3.834849  | 0.487401  | -4.019240 |
| H142 | 3.907938  | 2.200926  | -3.629448 |
| H143 | 4.872949  | -0.048263 | -1.765523 |
| H144 | 5.007326  | 1.700902  | -1.455253 |
| H145 | 6.223789  | 0.277027  | -3.884044 |
| H146 | 6.382926  | 1.987070  | -3.510195 |

---

<sup>a</sup>Part of the Gaussian output file:

SCF Done: E(RM06) = -4441.88579140 A.U. after 6 cycles

|                |         |         |         |
|----------------|---------|---------|---------|
|                | 1       | 2       | 3       |
|                | A       | A       | A       |
| Frequencies -- | 12.0766 | 15.7519 | 18.4728 |
| Red. masses -- | 5.3396  | 6.1160  | 7.1426  |

|                                              |                             |
|----------------------------------------------|-----------------------------|
| Zero-point correction=                       | 1.180311 (Hartree/Particle) |
| Thermal correction to Energy=                | 1.251619                    |
| Thermal correction to Enthalpy=              | 1.252563                    |
| Thermal correction to Gibbs Free Energy=     | 1.075213                    |
| Sum of electronic and zero-point Energies=   | -4440.705481                |
| Sum of electronic and thermal Energies=      | -4440.634172                |
| Sum of electronic and thermal Enthalpies=    | -4440.633228                |
| Sum of electronic and thermal Free Energies= | -4440.810578                |

| Item          | Value    | Threshold | Converged? |
|---------------|----------|-----------|------------|
| Maximum Force | 0.000144 | 0.000450  | YES        |
| RMS Force     | 0.000016 | 0.000300  | YES        |

**Table S13.** Electronic transitions computed by TD-DFT for the one-electron-reduced form with a stacking geometry  $[\text{PtL}^{1.5+}\text{-C1-MV}^{1.5+}]^{3+}$  (doublet), for which part of the Gaussian output is shown. Relevant MO's are shown below:

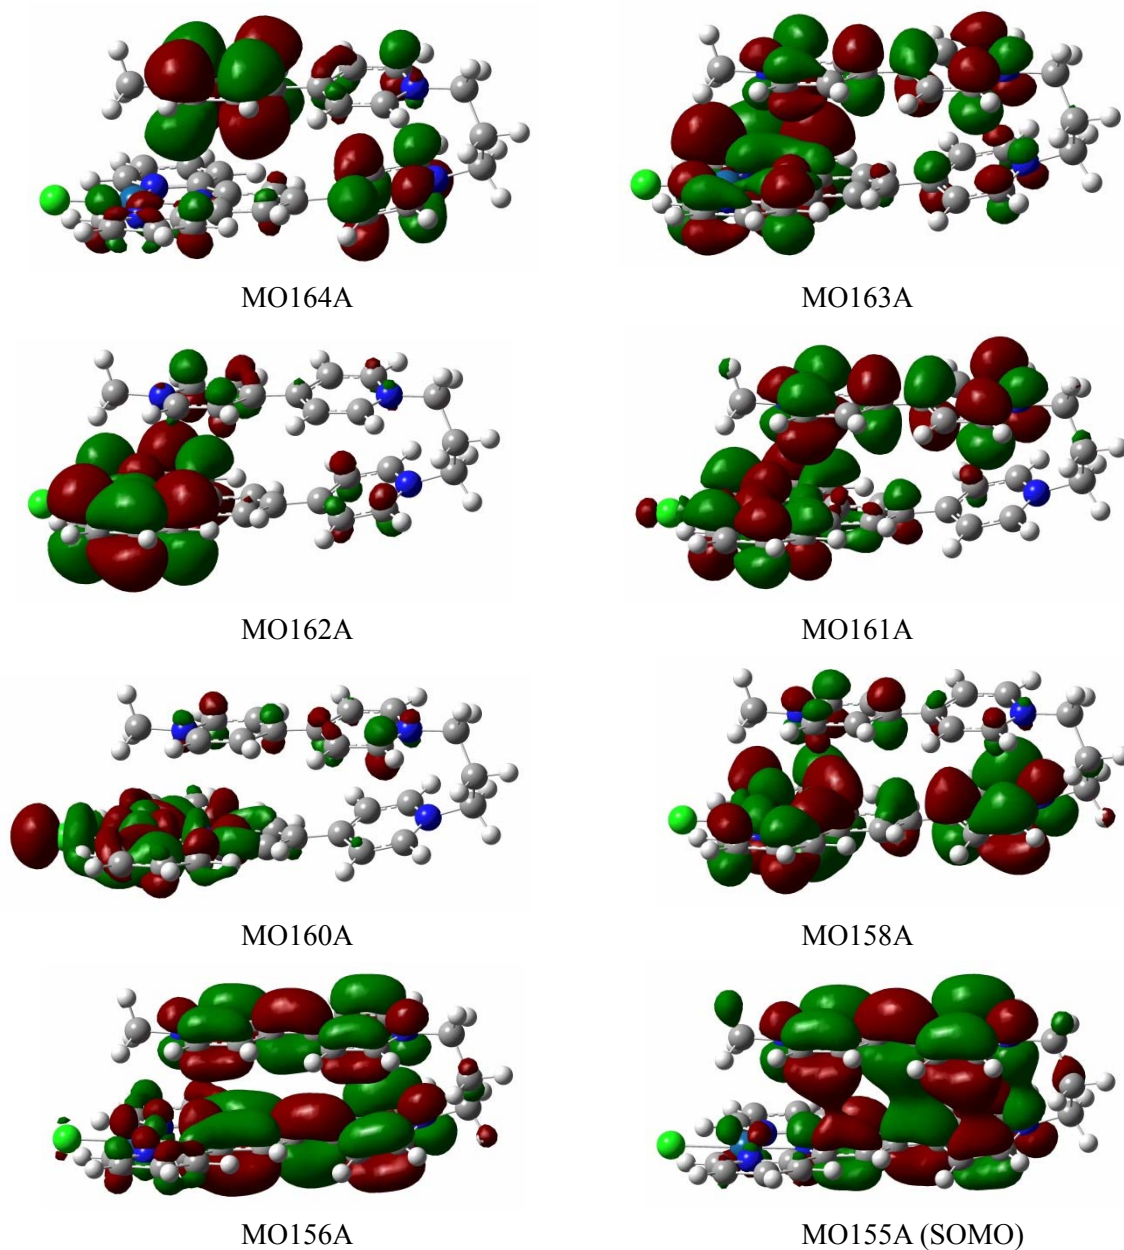


---

Excitation energies and oscillator strengths ( $\lambda > 200$  nm,  $f > 0.02$  only):

|               |    |                         |           |            |            |                                  |
|---------------|----|-------------------------|-----------|------------|------------|----------------------------------|
| Excited State | 1: | 2.004-A                 | 0.8059 eV | 1538.46 nm | $f=0.0851$ | $\langle S^{*2} \rangle = 0.754$ |
|               |    | 155A $\rightarrow$ 156A | 1.00474   |            |            |                                  |
|               |    | 155A $\leftarrow$ 156A  | -0.12151  |            |            |                                  |
| Excited State | 3: | 2.013-A                 | 1.5867 eV | 781.41 nm  | $f=0.1745$ | $\langle S^{*2} \rangle = 0.763$ |

|                   |          |           |           |          |              |  |
|-------------------|----------|-----------|-----------|----------|--------------|--|
| 155A ->158A       | 0.98475  |           |           |          |              |  |
| Excited State 5:  | 2.144-A  | 2.3923 eV | 518.26 nm | f=0.0720 | <S**2>=0.899 |  |
| 154A ->156A       | -0.17131 |           |           |          |              |  |
| 155A ->160A       | -0.43652 |           |           |          |              |  |
| 155A ->161A       | 0.54001  |           |           |          |              |  |
| 155A ->162A       | 0.26195  |           |           |          |              |  |
| 155A ->163A       | 0.36671  |           |           |          |              |  |
| 155A ->164A       | 0.42917  |           |           |          |              |  |
| 154B ->155B       | 0.18836  |           |           |          |              |  |
| Excited State 7:  | 2.113-A  | 2.4400 eV | 508.14 nm | f=0.0329 | <S**2>=0.866 |  |
| 154A ->160A       | -0.17557 |           |           |          |              |  |
| 155A ->160A       | 0.54012  |           |           |          |              |  |
| 155A ->161A       | 0.67022  |           |           |          |              |  |
| 155A ->163A       | 0.19948  |           |           |          |              |  |
| 155A ->164A       | -0.36422 |           |           |          |              |  |
| Excited State 8:  | 2.091-A  | 2.4634 eV | 503.31 nm | f=0.0139 | <S**2>=0.843 |  |
| 154A ->160A       | -0.14978 |           |           |          |              |  |
| 155A ->160A       | 0.60262  |           |           |          |              |  |
| 155A ->162A       | 0.21430  |           |           |          |              |  |
| 155A ->164A       | 0.71731  |           |           |          |              |  |
| Excited State 14: | 2.548-A  | 2.9050 eV | 426.80 nm | f=0.0382 | <S**2>=1.373 |  |
| 150A ->157A       | -0.17420 |           |           |          |              |  |
| 151A ->157A       | 0.31898  |           |           |          |              |  |
| 154A ->156A       | 0.28130  |           |           |          |              |  |
| 155A ->161A       | 0.11981  |           |           |          |              |  |
| 155A ->162A       | 0.13373  |           |           |          |              |  |
| 155A ->163A       | -0.31749 |           |           |          |              |  |
| 155A ->165A       | 0.22807  |           |           |          |              |  |
| 155A ->166A       | -0.35796 |           |           |          |              |  |
| 155A ->167A       | -0.13677 |           |           |          |              |  |
| 150B ->157B       | 0.16375  |           |           |          |              |  |
| 151B ->157B       | -0.24594 |           |           |          |              |  |
| 154B ->155B       | 0.50355  |           |           |          |              |  |
| Excited State 16: | 2.746-A  | 2.9638 eV | 418.33 nm | f=0.0269 | <S**2>=1.635 |  |
| 150A ->157A       | -0.10931 |           |           |          |              |  |
| 151A ->157A       | 0.14686  |           |           |          |              |  |
| 153A ->156A       | 0.64708  |           |           |          |              |  |
| 153A ->158A       | -0.18235 |           |           |          |              |  |
| 154A ->156A       | -0.53771 |           |           |          |              |  |
| 149B ->155B       | -0.11066 |           |           |          |              |  |
| 150B ->157B       | 0.10633  |           |           |          |              |  |
| 151B ->157B       | -0.24283 |           |           |          |              |  |
| 153B ->155B       | 0.14573  |           |           |          |              |  |
| 154B ->155B       | -0.20250 |           |           |          |              |  |
| Excited State 20: | 2.455-A  | 3.1597 eV | 392.40 nm | f=0.0930 | <S**2>=1.256 |  |
| 145A ->156A       | -0.14306 |           |           |          |              |  |
| 149A ->156A       | 0.32016  |           |           |          |              |  |
| 154A ->156A       | -0.17448 |           |           |          |              |  |

|                                                                     |          |
|---------------------------------------------------------------------|----------|
| 145B ->156B                                                         | 0.12918  |
| 146B ->163B                                                         | 0.10297  |
| 148B ->159B                                                         | -0.11760 |
| 149B ->155B                                                         | 0.68189  |
| 149B ->156B                                                         | -0.38750 |
| 154B ->155B                                                         | -0.10512 |
| 154B ->156B                                                         | -0.12310 |
| Excited State 36: 2.558-A 3.5832 eV 346.01 nm f=0.0706 <S**2>=1.385 |          |
| 146A ->156A                                                         | -0.11904 |
| 148A ->156A                                                         | 0.23774  |
| 150A ->156A                                                         | 0.42500  |
| 151A ->158A                                                         | -0.14816 |
| 154A ->157A                                                         | -0.41841 |
| 146B ->155B                                                         | 0.16870  |
| 146B ->156B                                                         | -0.15243 |
| 148B ->156B                                                         | -0.15716 |
| 150B ->155B                                                         | 0.33396  |
| 151B ->158B                                                         | 0.13306  |
| 152B ->160B                                                         | 0.14066  |
| 153B ->156B                                                         | -0.17163 |
| 154B ->157B                                                         | -0.36323 |
| Excited State 39: 2.972-A 3.6332 eV 341.25 nm f=0.0201 <S**2>=1.958 |          |
| 148A ->156A                                                         | 0.62107  |
| 148A ->158A                                                         | 0.14260  |
| 149A ->156A                                                         | -0.16952 |
| 150A ->156A                                                         | -0.24110 |
| 154A ->157A                                                         | 0.11663  |
| 154A ->160A                                                         | -0.15311 |
| 143B ->155B                                                         | 0.26256  |
| 143B ->158B                                                         | 0.10408  |
| 148B ->155B                                                         | 0.16810  |
| 148B ->156B                                                         | -0.40101 |
| 148B ->158B                                                         | -0.11324 |
| 148B ->164B                                                         | 0.10092  |
| 150B ->155B                                                         | -0.16331 |
| 154B ->157B                                                         | 0.12399  |
| 154B ->160B                                                         | -0.13119 |
| Excited State 42: 2.882-A 3.7274 eV 332.63 nm f=0.0212 <S**2>=1.826 |          |
| 146A ->156A                                                         | 0.15353  |
| 149A ->156A                                                         | -0.12451 |
| 150A ->156A                                                         | 0.19880  |
| 150A ->157A                                                         | 0.20705  |
| 151A ->157A                                                         | 0.11717  |
| 151A ->158A                                                         | 0.16263  |
| 152A ->160A                                                         | 0.15682  |
| 154A ->156A                                                         | 0.14509  |
| 154A ->158A                                                         | 0.54074  |
| 146B ->155B                                                         | -0.18764 |
| 146B ->156B                                                         | 0.15718  |
| 150B ->155B                                                         | 0.10713  |
| 150B ->156B                                                         | 0.12401  |

|                   |          |           |           |          |              |
|-------------------|----------|-----------|-----------|----------|--------------|
| 150B ->157B       | -0.17656 |           |           |          |              |
| 151B ->156B       | -0.38085 |           |           |          |              |
| 151B ->157B       | -0.13604 |           |           |          |              |
| 152B ->160B       | 0.15642  |           |           |          |              |
| Excited State 45: | 2.176-A  | 3.8095 eV | 325.46 nm | f=0.0356 | <S**2>=0.934 |
| 136A ->160A       | -0.10079 |           |           |          |              |
| 144A ->160A       | -0.13455 |           |           |          |              |
| 150A ->156A       | -0.11804 |           |           |          |              |
| 152A ->159A       | -0.10685 |           |           |          |              |
| 152A ->160A       | 0.54136  |           |           |          |              |
| 152A ->161A       | 0.17328  |           |           |          |              |
| 136B ->160B       | -0.10951 |           |           |          |              |
| 144B ->160B       | -0.14835 |           |           |          |              |
| 150B ->155B       | -0.11659 |           |           |          |              |
| 151B ->156B       | 0.31456  |           |           |          |              |
| 152B ->159B       | 0.11529  |           |           |          |              |
| 152B ->160B       | 0.58962  |           |           |          |              |
| 154B ->157B       | 0.10392  |           |           |          |              |
| Excited State 46: | 2.530-A  | 3.8246 eV | 324.18 nm | f=0.0391 | <S**2>=1.350 |
| 145A ->156A       | 0.11512  |           |           |          |              |
| 146A ->156A       | -0.26379 |           |           |          |              |
| 150A ->156A       | -0.16559 |           |           |          |              |
| 150A ->157A       | 0.11189  |           |           |          |              |
| 151A ->157A       | 0.10851  |           |           |          |              |
| 151A ->158A       | 0.10835  |           |           |          |              |
| 152A ->160A       | 0.13104  |           |           |          |              |
| 146B ->155B       | 0.48060  |           |           |          |              |
| 146B ->156B       | -0.27259 |           |           |          |              |
| 147B ->155B       | -0.31179 |           |           |          |              |
| 147B ->156B       | 0.12856  |           |           |          |              |
| 150B ->156B       | -0.11002 |           |           |          |              |
| 151B ->155B       | 0.15991  |           |           |          |              |
| 151B ->156B       | -0.44680 |           |           |          |              |
| 152B ->160B       | 0.13270  |           |           |          |              |
| Excited State 53: | 2.807-A  | 3.9321 eV | 315.31 nm | f=0.0339 | <S**2>=1.720 |
| 147A ->156A       | 0.10604  |           |           |          |              |
| 149A ->156A       | 0.10598  |           |           |          |              |
| 150A ->157A       | 0.13716  |           |           |          |              |
| 151A ->157A       | 0.20613  |           |           |          |              |
| 147B ->155B       | -0.15282 |           |           |          |              |
| 149B ->155B       | -0.18691 |           |           |          |              |
| 149B ->156B       | -0.12074 |           |           |          |              |
| 154B ->156B       | 0.14506  |           |           |          |              |
| 154B ->158B       | 0.84485  |           |           |          |              |
| 154B ->161B       | 0.10514  |           |           |          |              |
| Excited State 54: | 2.107-A  | 3.9735 eV | 312.02 nm | f=0.0815 | <S**2>=0.860 |
| 150A ->157A       | 0.18269  |           |           |          |              |
| 151A ->157A       | 0.60426  |           |           |          |              |
| 150B ->156B       | -0.20622 |           |           |          |              |
| 150B ->157B       | 0.24450  |           |           |          |              |

|                   |          |           |           |          |              |
|-------------------|----------|-----------|-----------|----------|--------------|
| 151B ->157B       | 0.60517  |           |           |          |              |
| 154B ->158B       | -0.10747 |           |           |          |              |
| Excited State 55: | 2.938-A  | 4.0031 eV | 309.72 nm | f=0.0160 | <S**2>=1.908 |
| 147A ->162A       | 0.11862  |           |           |          |              |
| 150A ->156A       | 0.20518  |           |           |          |              |
| 150A ->158A       | 0.35485  |           |           |          |              |
| 150A ->161A       | -0.15661 |           |           |          |              |
| 150A ->163A       | 0.14912  |           |           |          |              |
| 151A ->157A       | 0.14739  |           |           |          |              |
| 154A ->162A       | -0.11994 |           |           |          |              |
| 150B ->155B       | -0.21533 |           |           |          |              |
| 150B ->156B       | 0.51224  |           |           |          |              |
| 150B ->157B       | 0.11813  |           |           |          |              |
| 150B ->158B       | -0.31839 |           |           |          |              |
| 150B ->161B       | -0.17358 |           |           |          |              |
| 150B ->162B       | -0.11451 |           |           |          |              |
| 151B ->157B       | 0.17944  |           |           |          |              |
| 154B ->162B       | -0.11313 |           |           |          |              |
| Excited State 56: | 3.105-A  | 4.0637 eV | 305.10 nm | f=0.0463 | <S**2>=2.161 |
| 140A ->156A       | 0.10481  |           |           |          |              |
| 145A ->156A       | -0.22641 |           |           |          |              |
| 145A ->164A       | 0.11656  |           |           |          |              |
| 146A ->157A       | -0.13389 |           |           |          |              |
| 146A ->164A       | -0.26912 |           |           |          |              |
| 149A ->156A       | -0.18598 |           |           |          |              |
| 150A ->157A       | -0.10307 |           |           |          |              |
| 138B ->155B       | -0.13323 |           |           |          |              |
| 138B ->156B       | 0.11286  |           |           |          |              |
| 145B ->155B       | 0.21842  |           |           |          |              |
| 145B ->156B       | 0.12473  |           |           |          |              |
| 146B ->157B       | -0.17126 |           |           |          |              |
| 146B ->163B       | 0.30089  |           |           |          |              |
| 147B ->155B       | -0.29429 |           |           |          |              |
| 147B ->163B       | -0.14630 |           |           |          |              |
| 148B ->166B       | -0.11667 |           |           |          |              |
| 149B ->155B       | -0.23581 |           |           |          |              |
| 149B ->156B       | -0.28029 |           |           |          |              |
| 154B ->158B       | -0.12588 |           |           |          |              |
| Excited State 62: | 3.101-A  | 4.1784 eV | 296.72 nm | f=0.0201 | <S**2>=2.154 |
| 137A ->156A       | -0.12850 |           |           |          |              |
| 141A ->159A       | 0.15638  |           |           |          |              |
| 145A ->156A       | 0.12140  |           |           |          |              |
| 146A ->156A       | 0.15617  |           |           |          |              |
| 146A ->164A       | -0.21403 |           |           |          |              |
| 148A ->166A       | 0.13488  |           |           |          |              |
| 149A ->156A       | 0.15252  |           |           |          |              |
| 150A ->162A       | 0.14037  |           |           |          |              |
| 138B ->156B       | 0.11269  |           |           |          |              |
| 143B ->159B       | 0.20834  |           |           |          |              |
| 145B ->155B       | -0.29139 |           |           |          |              |
| 146B ->155B       | 0.26080  |           |           |          |              |

|                                                                     |          |
|---------------------------------------------------------------------|----------|
| 146B ->163B                                                         | 0.22476  |
| 147B ->155B                                                         | 0.18118  |
| 148B ->166B                                                         | -0.18989 |
| 149B ->156B                                                         | 0.31737  |
| 150B ->162B                                                         | 0.11721  |
| Excited State 63: 2.432-A 4.2150 eV 294.15 nm f=0.6645 <S**2>=1.229 |          |
| 145A ->156A                                                         | -0.15689 |
| 146A ->156A                                                         | -0.11760 |
| 147A ->156A                                                         | 0.11556  |
| 148A ->156A                                                         | 0.10696  |
| 149A ->156A                                                         | 0.63673  |
| 143B ->159B                                                         | 0.13519  |
| 145B ->155B                                                         | 0.42764  |
| 146B ->155B                                                         | -0.12621 |
| 148B ->156B                                                         | -0.11368 |
| 148B ->166B                                                         | -0.13332 |
| 149B ->156B                                                         | 0.37682  |
| Excited State 68: 2.555-A 4.3185 eV 287.10 nm f=0.1388 <S**2>=1.383 |          |
| 146A ->156A                                                         | 0.25079  |
| 147A ->156A                                                         | 0.23964  |
| 148A ->156A                                                         | 0.25790  |
| 155A ->169A                                                         | -0.45238 |
| 145B ->155B                                                         | 0.15804  |
| 146B ->155B                                                         | 0.29389  |
| 146B ->156B                                                         | 0.12845  |
| 148B ->155B                                                         | 0.17434  |
| 148B ->156B                                                         | 0.51780  |
| 150B ->156B                                                         | -0.10108 |
| Excited State 70: 2.774-A 4.3373 eV 285.85 nm f=0.1029 <S**2>=1.674 |          |
| 145A ->156A                                                         | 0.11317  |
| 146A ->156A                                                         | -0.24761 |
| 146A ->164A                                                         | -0.11532 |
| 147A ->156A                                                         | 0.49283  |
| 147A ->158A                                                         | -0.11743 |
| 148A ->166A                                                         | -0.10404 |
| 149A ->156A                                                         | -0.10442 |
| 149A ->158A                                                         | 0.11394  |
| 155A ->169A                                                         | 0.27182  |
| 143B ->155B                                                         | -0.10017 |
| 143B ->159B                                                         | -0.12211 |
| 146B ->156B                                                         | -0.13101 |
| 146B ->163B                                                         | 0.12748  |
| 147B ->155B                                                         | 0.41727  |
| 148B ->166B                                                         | 0.13634  |
| 149B ->156B                                                         | 0.17536  |
| Excited State 71: 2.050-A 4.3725 eV 283.55 nm f=0.1411 <S**2>=0.800 |          |
| 147A ->156A                                                         | -0.14974 |
| 150A ->157A                                                         | 0.61189  |
| 151A ->157A                                                         | -0.19661 |
| 145B ->155B                                                         | -0.12482 |

|                    |          |           |           |          |              |
|--------------------|----------|-----------|-----------|----------|--------------|
| 147B ->155B        | -0.12981 |           |           |          |              |
| 150B ->157B        | 0.62981  |           |           |          |              |
| 151B ->157B        | -0.18597 |           |           |          |              |
| Excited State 74:  | 2.917-A  | 4.4440 eV | 278.99 nm | f=0.0753 | <S**2>=1.877 |
| 145A ->156A        | 0.45795  |           |           |          |              |
| 146A ->156A        | 0.12424  |           |           |          |              |
| 147A ->156A        | -0.12779 |           |           |          |              |
| 149A ->157A        | -0.19105 |           |           |          |              |
| 150A ->158A        | -0.22179 |           |           |          |              |
| 155A ->169A        | -0.23037 |           |           |          |              |
| 145B ->155B        | 0.29286  |           |           |          |              |
| 146B ->155B        | -0.21263 |           |           |          |              |
| 146B ->157B        | -0.11708 |           |           |          |              |
| 149B ->157B        | 0.43957  |           |           |          |              |
| 149B ->159B        | 0.12641  |           |           |          |              |
| 154B ->159B        | 0.16577  |           |           |          |              |
| Excited State 78:  | 2.769-A  | 4.5363 eV | 273.32 nm | f=0.0684 | <S**2>=1.667 |
| 146A ->156A        | -0.12551 |           |           |          |              |
| 147A ->157A        | 0.24207  |           |           |          |              |
| 150A ->158A        | 0.52759  |           |           |          |              |
| 155A ->169A        | -0.17113 |           |           |          |              |
| 147B ->157B        | -0.25043 |           |           |          |              |
| 150B ->158B        | 0.39633  |           |           |          |              |
| 151B ->158B        | 0.25403  |           |           |          |              |
| 151B ->162B        | -0.10991 |           |           |          |              |
| 154B ->159B        | -0.14714 |           |           |          |              |
| 154B ->161B        | -0.10187 |           |           |          |              |
| 154B ->162B        | 0.13603  |           |           |          |              |
| Excited State 81:  | 2.791-A  | 4.5766 eV | 270.91 nm | f=0.0456 | <S**2>=1.698 |
| 146A ->156A        | 0.26566  |           |           |          |              |
| 147A ->157A        | -0.13187 |           |           |          |              |
| 149A ->157A        | 0.15436  |           |           |          |              |
| 150A ->158A        | 0.27859  |           |           |          |              |
| 151A ->158A        | 0.10732  |           |           |          |              |
| 151A ->161A        | 0.13944  |           |           |          |              |
| 151A ->163A        | -0.14341 |           |           |          |              |
| 154A ->159A        | 0.19724  |           |           |          |              |
| 146B ->156B        | -0.30599 |           |           |          |              |
| 147B ->156B        | 0.18939  |           |           |          |              |
| 149B ->159B        | 0.17760  |           |           |          |              |
| 150B ->158B        | 0.41033  |           |           |          |              |
| 151B ->158B        | -0.13115 |           |           |          |              |
| 154B ->159B        | 0.35122  |           |           |          |              |
| Excited State 127: | 2.176-A  | 5.1205 eV | 242.13 nm | f=0.0242 | <S**2>=0.934 |
| 140A ->156A        | -0.30346 |           |           |          |              |
| 143A ->156A        | 0.16470  |           |           |          |              |
| 150A ->160A        | 0.11869  |           |           |          |              |
| 151A ->159A        | -0.45194 |           |           |          |              |
| 151A ->160A        | -0.17858 |           |           |          |              |
| 151A ->162A        | -0.16334 |           |           |          |              |



|                    |          |           |           |          |              |
|--------------------|----------|-----------|-----------|----------|--------------|
| 140B ->155B        | -0.26934 |           |           |          |              |
| 142B ->155B        | 0.14010  |           |           |          |              |
| 147B ->157B        | 0.10551  |           |           |          |              |
| 150B ->160B        | 0.11964  |           |           |          |              |
| 151B ->159B        | 0.50467  |           |           |          |              |
| 151B ->160B        | -0.18235 |           |           |          |              |
| 151B ->161B        | -0.10217 |           |           |          |              |
| Excited State 128: | 2.416-A  | 5.1336 eV | 241.52 nm | f=0.3245 | <S**2>=1.209 |
| 146A ->157A        | -0.13579 |           |           |          |              |
| 146A ->158A        | 0.13448  |           |           |          |              |
| 147A ->157A        | 0.40390  |           |           |          |              |
| 147A ->158A        | 0.10384  |           |           |          |              |
| 151A ->160A        | -0.11323 |           |           |          |              |
| 151A ->161A        | 0.41871  |           |           |          |              |
| 151A ->163A        | -0.18210 |           |           |          |              |
| 154A ->164A        | -0.16863 |           |           |          |              |
| 146B ->157B        | 0.23749  |           |           |          |              |
| 147B ->157B        | 0.13369  |           |           |          |              |
| 149B ->159B        | 0.12378  |           |           |          |              |
| 151B ->161B        | -0.39857 |           |           |          |              |
| 151B ->162B        | -0.25449 |           |           |          |              |
| Excited State 129: | 2.843-A  | 5.1410 eV | 241.17 nm | f=0.0598 | <S**2>=1.770 |
| 137A ->156A        | 0.11060  |           |           |          |              |
| 140A ->156A        | 0.24452  |           |           |          |              |
| 142A ->156A        | -0.14784 |           |           |          |              |
| 143A ->156A        | 0.25124  |           |           |          |              |
| 149A ->157A        | 0.11941  |           |           |          |              |
| 149A ->159A        | 0.12253  |           |           |          |              |
| 151A ->159A        | -0.10448 |           |           |          |              |
| 151A ->161A        | -0.15387 |           |           |          |              |
| 151A ->162A        | 0.17275  |           |           |          |              |
| 151A ->163A        | 0.10050  |           |           |          |              |
| 154A ->164A        | -0.18042 |           |           |          |              |
| 138B ->155B        | -0.18389 |           |           |          |              |
| 142B ->155B        | 0.15565  |           |           |          |              |
| 145B ->156B        | -0.10175 |           |           |          |              |
| 145B ->157B        | 0.27989  |           |           |          |              |
| 147B ->157B        | -0.18095 |           |           |          |              |
| 148B ->158B        | -0.17303 |           |           |          |              |
| 149B ->158B        | 0.10753  |           |           |          |              |
| 149B ->159B        | 0.15326  |           |           |          |              |
| 151B ->159B        | 0.30808  |           |           |          |              |
| 151B ->161B        | 0.19484  |           |           |          |              |
| 154B ->163B        | -0.26770 |           |           |          |              |
| Excited State 130: | 2.779-A  | 5.1538 eV | 240.57 nm | f=0.0308 | <S**2>=1.681 |
| 138A ->156A        | 0.10538  |           |           |          |              |
| 140A ->156A        | 0.38349  |           |           |          |              |
| 141A ->156A        | -0.11245 |           |           |          |              |
| 143A ->156A        | 0.21414  |           |           |          |              |
| 145A ->157A        | 0.11442  |           |           |          |              |
| 146A ->158A        | -0.14155 |           |           |          |              |

|             |          |
|-------------|----------|
| 148A ->157A | -0.16607 |
| 148A ->158A | -0.10830 |
| 151A ->159A | -0.18195 |
| 151A ->162A | 0.14692  |
| 151A ->163A | -0.15210 |
| 154A ->163A | -0.12174 |
| 140B ->155B | 0.24640  |
| 142B ->155B | 0.16494  |
| 145B ->156B | -0.12349 |
| 145B ->157B | -0.14305 |
| 146B ->157B | 0.18433  |
| 147B ->157B | 0.12603  |
| 149B ->159B | -0.19148 |
| 151B ->159B | 0.13850  |
| 151B ->162B | -0.15225 |
| 154B ->163B | 0.37090  |

Excited State 153: 2.436-A 5.4201 eV 228.75 nm f=0.0210 <S\*\*2>=1.233

|             |          |
|-------------|----------|
| 139A ->156A | 0.13744  |
| 145A ->158A | 0.11211  |
| 150A ->159A | 0.68483  |
| 150A ->160A | 0.20971  |
| 150A ->161A | -0.11936 |
| 150A ->162A | -0.12336 |
| 151A ->159A | 0.10179  |
| 151A ->163A | 0.13265  |
| 151A ->164A | -0.26076 |
| 139B ->155B | 0.16380  |
| 146B ->158B | -0.13801 |
| 147B ->158B | 0.13806  |
| 150B ->159B | -0.23886 |
| 150B ->162B | 0.20802  |

Excited State 154: 2.359-A 5.4242 eV 228.58 nm f=0.0440 <S\*\*2>=1.141

|             |          |
|-------------|----------|
| 139A ->156A | 0.30793  |
| 139A ->158A | -0.10545 |
| 143A ->157A | 0.17100  |
| 147A ->158A | -0.10316 |
| 150A ->159A | -0.35485 |
| 150A ->161A | -0.32960 |
| 150A ->162A | 0.12169  |
| 150A ->163A | 0.13657  |
| 151A ->163A | 0.16822  |
| 151A ->164A | 0.15050  |
| 139B ->155B | 0.42262  |
| 145B ->158B | 0.11994  |
| 146B ->158B | -0.25262 |
| 150B ->161B | 0.30337  |
| 150B ->162B | 0.11381  |

Excited State 174: 2.306-A 5.5722 eV 222.50 nm f=0.0202 <S\*\*2>=1.079

|             |          |
|-------------|----------|
| 138A ->156A | 0.28319  |
| 148A ->159A | -0.13612 |
| 150A ->159A | 0.14164  |

|             |          |
|-------------|----------|
| 150A ->162A | 0.40576  |
| 137B ->155B | 0.17567  |
| 138B ->155B | 0.18656  |
| 139B ->157B | 0.12454  |
| 140B ->156B | -0.30054 |
| 142B ->156B | -0.27921 |
| 142B ->157B | 0.11502  |
| 145B ->158B | -0.10217 |
| 146B ->158B | 0.10166  |
| 148B ->159B | 0.14856  |
| 150B ->159B | -0.17138 |
| 150B ->161B | 0.30270  |
| 150B ->162B | -0.23992 |
| 154B ->164B | 0.14073  |

---

**Table S14.** Electronic transitions computed by TD-DFT for the one-electron-reduced form  $\text{PtL}^{2+}$  (i.e.,  $\text{PtL}^{+\bullet}$ ; doublet), for which part of the Gaussian output is shown. Relevant MO's are shown below:

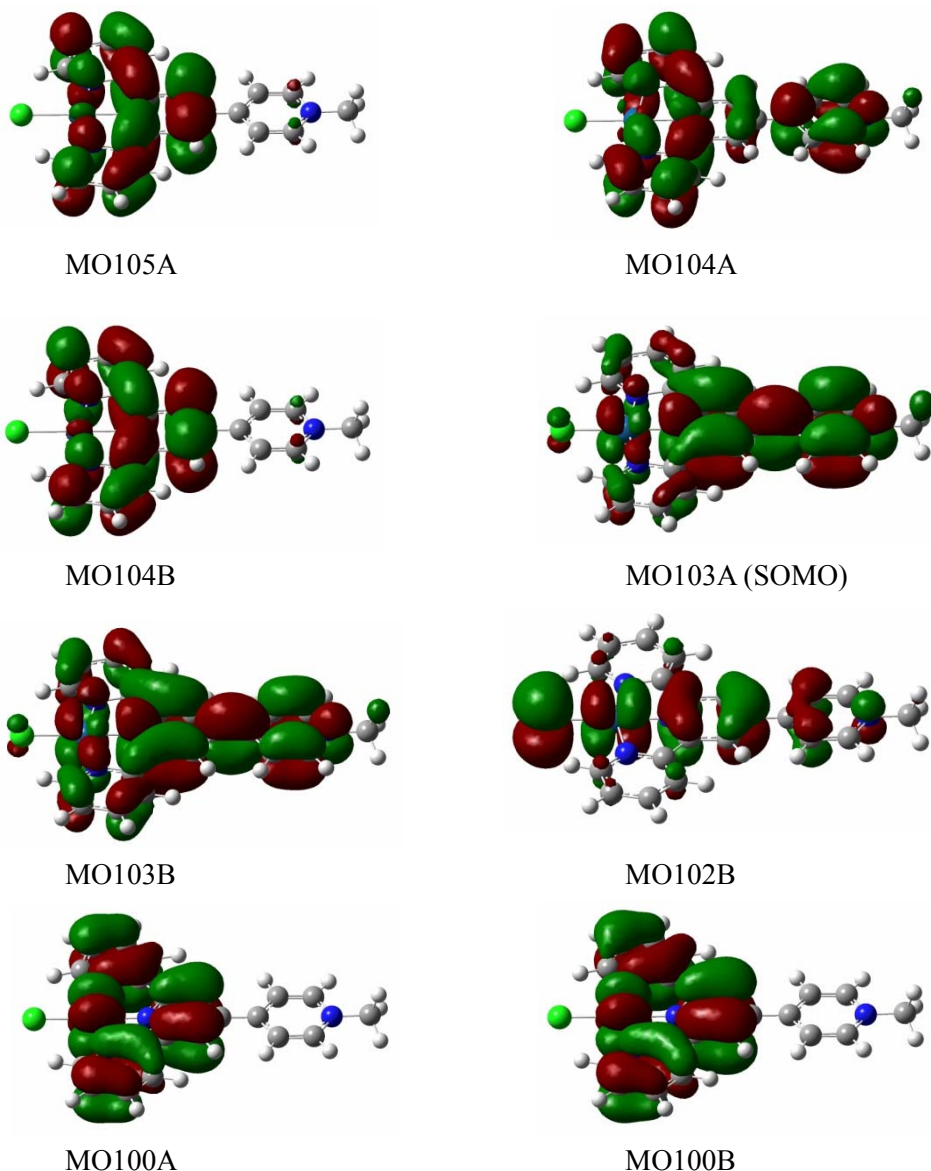


---

Excitation energies and oscillator strengths ( $\lambda > 200$  nm,  $f > 0.02$  only):

Excitation energies and oscillator strengths:

|               |    |             |           |           |            |                                  |
|---------------|----|-------------|-----------|-----------|------------|----------------------------------|
| Excited State | 2: | 2.013-A     | 1.3963 eV | 887.96 nm | $f=0.3245$ | $\langle S^{*2} \rangle = 0.763$ |
|               |    | 103A ->104A | 0.98588   |           |            |                                  |
|               |    | 102B ->103B | 0.11235   |           |            |                                  |
| Excited State | 7: | 2.477-A     | 2.7066 eV | 458.09 nm | $f=0.1412$ | $\langle S^{*2} \rangle = 1.284$ |
|               |    | 98A ->105A  | 0.15968   |           |            |                                  |
|               |    | 100A ->105A | -0.17912  |           |            |                                  |

|                   |          |           |           |          |              |  |
|-------------------|----------|-----------|-----------|----------|--------------|--|
| 103A ->111A       | -0.17379 |           |           |          |              |  |
| 97B ->103B        | 0.14058  |           |           |          |              |  |
| 98B ->104B        | 0.13358  |           |           |          |              |  |
| 100B ->104B       | -0.32651 |           |           |          |              |  |
| 102B ->103B       | 0.82149  |           |           |          |              |  |
| Excited State 10: | 2.967-A  | 3.0475 eV | 406.84 nm | f=0.1524 | <S**2>=1.951 |  |
| 96A ->104A        | -0.10693 |           |           |          |              |  |
| 98A ->105A        | -0.18589 |           |           |          |              |  |
| 98A ->107A        | 0.10908  |           |           |          |              |  |
| 100A ->105A       | 0.44637  |           |           |          |              |  |
| 103A ->108A       | 0.10383  |           |           |          |              |  |
| 103A ->111A       | 0.35991  |           |           |          |              |  |
| 96B ->103B        | 0.11852  |           |           |          |              |  |
| 96B ->108B        | 0.10300  |           |           |          |              |  |
| 98B ->104B        | -0.17193 |           |           |          |              |  |
| 100B ->104B       | 0.44020  |           |           |          |              |  |
| 102B ->103B       | 0.47586  |           |           |          |              |  |
| 102B ->105B       | -0.13335 |           |           |          |              |  |
| Excited State 13: | 2.399-A  | 3.1796 eV | 389.94 nm | f=0.0607 | <S**2>=1.189 |  |
| 98A ->105A        | 0.13661  |           |           |          |              |  |
| 100A ->105A       | -0.29720 |           |           |          |              |  |
| 103A ->108A       | -0.11064 |           |           |          |              |  |
| 103A ->111A       | 0.85072  |           |           |          |              |  |
| 100B ->104B       | -0.22245 |           |           |          |              |  |
| Excited State 18: | 2.497-A  | 3.5084 eV | 353.40 nm | f=0.0213 | <S**2>=1.309 |  |
| 98A ->108A        | 0.10319  |           |           |          |              |  |
| 100A ->104A       | 0.32563  |           |           |          |              |  |
| 102A ->105A       | 0.22440  |           |           |          |              |  |
| 90B ->103B        | 0.10089  |           |           |          |              |  |
| 98B ->103B        | 0.69026  |           |           |          |              |  |
| 98B ->105B        | -0.12243 |           |           |          |              |  |
| 100B ->103B       | -0.24940 |           |           |          |              |  |
| 100B ->105B       | -0.18881 |           |           |          |              |  |
| 102B ->104B       | -0.36962 |           |           |          |              |  |
| Excited State 20: | 2.867-A  | 3.5599 eV | 348.28 nm | f=0.0565 | <S**2>=1.805 |  |
| 97A ->104A        | 0.10742  |           |           |          |              |  |
| 101A ->106A       | -0.32736 |           |           |          |              |  |
| 102A ->104A       | 0.62829  |           |           |          |              |  |
| 103A ->111A       | -0.10777 |           |           |          |              |  |
| 103A ->112A       | -0.18462 |           |           |          |              |  |
| 96B ->103B        | -0.10224 |           |           |          |              |  |
| 97B ->103B        | -0.37423 |           |           |          |              |  |
| 97B ->105B        | -0.11591 |           |           |          |              |  |
| 101B ->106B       | -0.31580 |           |           |          |              |  |
| 102B ->105B       | -0.34655 |           |           |          |              |  |
| Excited State 21: | 2.213-A  | 3.5973 eV | 344.66 nm | f=0.0844 | <S**2>=0.975 |  |
| 101A ->106A       | 0.60319  |           |           |          |              |  |
| 102A ->104A       | 0.22629  |           |           |          |              |  |
| 103A ->112A       | -0.21554 |           |           |          |              |  |

97B ->103B -0.20733  
101B ->106B 0.62203  
102B ->105B -0.20517

Excited State 25: 2.387-A 3.7088 eV 334.29 nm f=0.0641 <S\*\*2>=1.174  
102A ->105A 0.78523  
102A ->106A -0.20241  
103A ->115A -0.14505  
98B ->103B -0.36165  
98B ->105B 0.10710  
99B ->106B 0.17264  
102B ->104B -0.24971  
102B ->106B -0.12136

Excited State 26: 2.257-A 3.7676 eV 329.08 nm f=0.2484 <S\*\*2>=1.023  
98A ->105A 0.12435  
102A ->104A 0.66452  
95B ->110B -0.11951  
97B ->103B 0.42324  
97B ->105B 0.11128  
100B ->104B 0.11902  
102B ->105B 0.45610

Excited State 31: 3.074-A 3.9069 eV 317.35 nm f=0.0444 <S\*\*2>=2.113  
90A ->105A -0.10633  
91A ->104A -0.13755  
98A ->104A 0.14349  
98A ->105A 0.41257  
98A ->107A 0.13641  
99A ->106A 0.16856  
100A ->105A 0.20111  
100A ->107A 0.15045  
102A ->104A -0.14265  
103A ->115A -0.37949  
90B ->104B 0.10394  
91B ->103B -0.12757  
91B ->105B 0.13115  
98B ->104B 0.40876  
98B ->107B -0.14939  
99B ->106B 0.20043  
100B ->107B -0.12400  
102B ->105B -0.13242

Excited State 32: 2.802-A 3.9072 eV 317.32 nm f=0.0425 <S\*\*2>=1.713  
98A ->104A -0.19535  
98A ->105A 0.29488  
98A ->108A -0.14632  
99A ->106A -0.23582  
100A ->105A 0.14272  
100A ->107A 0.10784  
102A ->104A -0.10075  
102A ->105A 0.10228  
103A ->115A 0.53556

|             |          |
|-------------|----------|
| 96B ->107B  | -0.10949 |
| 97B ->104B  | 0.10414  |
| 98B ->104B  | 0.28968  |
| 98B ->105B  | 0.10852  |
| 98B ->107B  | -0.10511 |
| 98B ->108B  | 0.11206  |
| 99B ->106B  | -0.28054 |
| 100B ->105B | -0.12698 |
| 102B ->104B | -0.11203 |
| 102B ->107B | 0.10578  |

Excited State 37: 2.879-A 4.0622 eV 305.22 nm f=0.0604 <S\*\*2>=1.821

|             |          |
|-------------|----------|
| 91A ->107A  | -0.10292 |
| 96A ->107A  | 0.15986  |
| 98A ->104A  | 0.40636  |
| 98A ->108A  | 0.24154  |
| 102A ->107A | 0.18121  |
| 103A ->115A | 0.46153  |
| 91B ->107B  | 0.11933  |
| 95B ->103B  | -0.30795 |
| 95B ->105B  | -0.13835 |
| 96B ->107B  | 0.14557  |
| 98B ->103B  | -0.22829 |
| 98B ->105B  | -0.24034 |
| 98B ->108B  | -0.22848 |
| 100B ->105B | 0.10485  |
| 102B ->107B | -0.19728 |

Excited State 41: 2.573-A 4.1245 eV 300.60 nm f=0.1075 <S\*\*2>=1.405

|             |          |
|-------------|----------|
| 95A ->104A  | -0.22125 |
| 96A ->105A  | 0.10747  |
| 97A ->105A  | -0.15141 |
| 98A ->104A  | 0.34426  |
| 100A ->104A | 0.31258  |
| 95B ->103B  | 0.62679  |
| 95B ->105B  | 0.29271  |
| 96B ->104B  | -0.15340 |
| 98B ->103B  | -0.16839 |
| 98B ->105B  | -0.10282 |
| 100B ->105B | 0.16688  |
| 100B ->108B | -0.12021 |

Excited State 42: 2.572-A 4.1438 eV 299.21 nm f=0.0542 <S\*\*2>=1.404

|             |          |
|-------------|----------|
| 96A ->104A  | 0.15247  |
| 98A ->107A  | 0.14824  |
| 100A ->105A | -0.40904 |
| 96B ->103B  | -0.33076 |
| 96B ->105B  | 0.16607  |
| 97B ->103B  | -0.29382 |
| 98B ->104B  | 0.24178  |
| 98B ->107B  | -0.18748 |
| 100B ->104B | 0.43238  |
| 100B ->107B | 0.14915  |
| 102B ->103B | 0.12502  |

|                   |          |           |           |          |              |
|-------------------|----------|-----------|-----------|----------|--------------|
| 102B ->105B       | 0.36315  |           |           |          |              |
| 102B ->108B       | -0.10404 |           |           |          |              |
| Excited State 45: | 2.743-A  | 4.1762 eV | 296.88 nm | f=0.0683 | <S**2>=1.631 |
| 90A ->105A        | 0.12515  |           |           |          |              |
| 96A ->104A        | 0.24239  |           |           |          |              |
| 96A ->108A        | 0.14213  |           |           |          |              |
| 97A ->104A        | -0.15381 |           |           |          |              |
| 98A ->105A        | 0.12273  |           |           |          |              |
| 98A ->107A        | 0.23003  |           |           |          |              |
| 100A ->105A       | 0.43375  |           |           |          |              |
| 100A ->107A       | -0.19228 |           |           |          |              |
| 102A ->108A       | 0.16077  |           |           |          |              |
| 90B ->104B        | -0.12898 |           |           |          |              |
| 96B ->103B        | -0.41931 |           |           |          |              |
| 96B ->105B        | 0.20934  |           |           |          |              |
| 98B ->104B        | -0.23637 |           |           |          |              |
| 98B ->107B        | -0.15219 |           |           |          |              |
| 100B ->104B       | -0.34982 |           |           |          |              |
| 100B ->107B       | 0.17751  |           |           |          |              |
| Excited State 48: | 3.190-A  | 4.4110 eV | 281.08 nm | f=0.0332 | <S**2>=2.294 |
| 95A ->105A        | -0.14953 |           |           |          |              |
| 95A ->110A        | -0.50538 |           |           |          |              |
| 97A ->104A        | 0.16425  |           |           |          |              |
| 103A ->111A       | 0.13314  |           |           |          |              |
| 88B ->103B        | -0.15594 |           |           |          |              |
| 94B ->103B        | 0.12361  |           |           |          |              |
| 95B ->104B        | -0.17284 |           |           |          |              |
| 95B ->110B        | 0.55658  |           |           |          |              |
| 96B ->103B        | -0.14635 |           |           |          |              |
| 97B ->103B        | 0.36648  |           |           |          |              |
| 97B ->105B        | -0.15688 |           |           |          |              |
| Excited State 49: | 2.726-A  | 4.4753 eV | 277.04 nm | f=0.1648 | <S**2>=1.608 |
| 95A ->110A        | -0.20286 |           |           |          |              |
| 96A ->104A        | 0.14065  |           |           |          |              |
| 97A ->104A        | -0.24837 |           |           |          |              |
| 98A ->105A        | 0.44920  |           |           |          |              |
| 100A ->107A       | -0.22761 |           |           |          |              |
| 88B ->103B        | 0.13590  |           |           |          |              |
| 94B ->103B        | -0.15636 |           |           |          |              |
| 95B ->110B        | 0.23991  |           |           |          |              |
| 96B ->103B        | 0.27710  |           |           |          |              |
| 97B ->105B        | 0.23323  |           |           |          |              |
| 98B ->104B        | -0.30768 |           |           |          |              |
| 100B ->104B       | 0.21192  |           |           |          |              |
| 102B ->108B       | -0.25288 |           |           |          |              |
| 102B ->112B       | -0.12334 |           |           |          |              |
| Excited State 51: | 2.713-A  | 4.5444 eV | 272.83 nm | f=0.0836 | <S**2>=1.590 |
| 91A ->104A        | 0.13034  |           |           |          |              |
| 97A ->104A        | -0.24453 |           |           |          |              |
| 98A ->105A        | -0.37362 |           |           |          |              |



|                   |                                                   |
|-------------------|---------------------------------------------------|
| 98A ->107A        | -0.11185                                          |
| 100A ->105A       | 0.24227                                           |
| 100A ->107A       | -0.12973                                          |
| 102A ->108A       | 0.17549                                           |
| 103A ->118A       | 0.11261                                           |
| 88B ->103B        | 0.10407                                           |
| 91B ->108B        | -0.12365                                          |
| 96B ->103B        | 0.13495                                           |
| 97B ->105B        | 0.12724                                           |
| 98B ->104B        | 0.53862                                           |
| 98B ->107B        | 0.17656                                           |
| 100B ->107B       | 0.34506                                           |
|                   |                                                   |
| Excited State 54: | 2.671-A 4.6090 eV 269.01 nm f=0.0424 <S**2>=1.533 |
| 90A ->104A        | -0.10713                                          |
| 91A ->107A        | -0.11133                                          |
| 96A ->105A        | -0.16548                                          |
| 97A ->105A        | -0.18796                                          |
| 98A ->104A        | -0.37887                                          |
| 100A ->108A       | 0.26537                                           |
| 102A ->107A       | 0.18759                                           |
| 91B ->104B        | -0.10228                                          |
| 97B ->104B        | -0.32603                                          |
| 98B ->105B        | -0.40711                                          |
| 102B ->107B       | 0.50922                                           |
|                   |                                                   |
| Excited State 55: | 3.000-A 4.6491 eV 266.68 nm f=0.0457 <S**2>=1.999 |
| 89A ->104A        | -0.10077                                          |
| 90A ->104A        | 0.10451                                           |
| 93A ->105A        | -0.11394                                          |
| 96A ->105A        | 0.29527                                           |
| 97A ->105A        | 0.11971                                           |
| 98A ->104A        | -0.30558                                          |
| 98A ->108A        | 0.11357                                           |
| 100A ->108A       | 0.27264                                           |
| 103A ->115A       | -0.15834                                          |
| 90B ->103B        | -0.16061                                          |
| 90B ->105B        | 0.10135                                           |
| 94B ->104B        | -0.11270                                          |
| 96B ->104B        | -0.30980                                          |
| 97B ->104B        | 0.42907                                           |
| 98B ->105B        | -0.40676                                          |
| 98B ->108B        | -0.11873                                          |
| 100B ->105B       | -0.14516                                          |
| 102B ->107B       | -0.15582                                          |
|                   |                                                   |
| Excited State 71: | 2.160-A 5.0131 eV 247.32 nm f=0.0328 <S**2>=0.916 |
| 97A ->104A        | 0.35448                                           |
| 98A ->105A        | 0.14679                                           |
| 100A ->107A       | 0.52581                                           |
| 89B ->104B        | -0.11911                                          |
| 90B ->104B        | -0.11800                                          |
| 91B ->103B        | -0.19760                                          |
| 96B ->103B        | 0.17715                                           |

|                    |          |           |           |          |              |
|--------------------|----------|-----------|-----------|----------|--------------|
| 96B ->105B         | 0.15914  |           |           |          |              |
| 97B ->105B         | 0.16280  |           |           |          |              |
| 98B ->104B         | -0.10896 |           |           |          |              |
| 100B ->107B        | 0.56410  |           |           |          |              |
| Excited State 73:  | 2.277-A  | 5.0324 eV | 246.37 nm | f=0.2486 | <S**2>=1.046 |
| 96A ->105A         | -0.12644 |           |           |          |              |
| 98A ->104A         | 0.10099  |           |           |          |              |
| 98A ->108A         | 0.13740  |           |           |          |              |
| 100A ->108A        | 0.51838  |           |           |          |              |
| 102A ->110A        | 0.11476  |           |           |          |              |
| 90B ->103B         | -0.10614 |           |           |          |              |
| 96B ->104B         | -0.30805 |           |           |          |              |
| 97B ->104B         | -0.13637 |           |           |          |              |
| 98B ->105B         | 0.31209  |           |           |          |              |
| 98B ->108B         | 0.10985  |           |           |          |              |
| 100B ->105B        | -0.10981 |           |           |          |              |
| 100B ->108B        | 0.56825  |           |           |          |              |
| 102B ->110B        | -0.13839 |           |           |          |              |
| Excited State 85:  | 2.048-A  | 5.2490 eV | 236.20 nm | f=0.3522 | <S**2>=0.798 |
| 96A ->105A         | 0.56607  |           |           |          |              |
| 97A ->105A         | -0.17402 |           |           |          |              |
| 98A ->108A         | -0.10230 |           |           |          |              |
| 100A ->108A        | 0.28864  |           |           |          |              |
| 96B ->104B         | 0.65017  |           |           |          |              |
| 100B ->108B        | 0.25068  |           |           |          |              |
| Excited State 95:  | 2.420-A  | 5.4569 eV | 227.21 nm | f=0.0290 | <S**2>=1.215 |
| 91A ->104A         | 0.13225  |           |           |          |              |
| 96A ->104A         | 0.13642  |           |           |          |              |
| 97A ->104A         | -0.20488 |           |           |          |              |
| 98A ->107A         | -0.41803 |           |           |          |              |
| 100A ->107A        | 0.11967  |           |           |          |              |
| 101A ->109A        | 0.17127  |           |           |          |              |
| 102A ->111A        | -0.11954 |           |           |          |              |
| 88B ->103B         | -0.10730 |           |           |          |              |
| 95B ->104B         | 0.61630  |           |           |          |              |
| 95B ->110B         | 0.11843  |           |           |          |              |
| 96B ->105B         | -0.14115 |           |           |          |              |
| 98B ->107B         | -0.37963 |           |           |          |              |
| 100B ->107B        | 0.10989  |           |           |          |              |
| 101B ->109B        | 0.13828  |           |           |          |              |
| Excited State 98:  | 2.017-A  | 5.4963 eV | 225.58 nm | f=0.0271 | <S**2>=0.767 |
| 98A ->108A         | -0.18734 |           |           |          |              |
| 99A ->109A         | 0.68664  |           |           |          |              |
| 98B ->108B         | -0.20127 |           |           |          |              |
| 99B ->109B         | 0.63270  |           |           |          |              |
| Excited State 105: | 2.056-A  | 5.5980 eV | 221.48 nm | f=0.0420 | <S**2>=0.806 |
| 95A ->104A         | 0.44236  |           |           |          |              |
| 102A ->110A        | -0.44933 |           |           |          |              |
| 95B ->103B         | -0.10883 |           |           |          |              |

|                    |          |           |           |          |              |
|--------------------|----------|-----------|-----------|----------|--------------|
| 95B ->105B         | 0.59835  |           |           |          |              |
| 97B ->110B         | 0.11201  |           |           |          |              |
| 102B ->110B        | -0.42310 |           |           |          |              |
| Excited State 125: | 2.100-A  | 5.8596 eV | 211.59 nm | f=0.0318 | <S**2>=0.853 |
| 88A ->106A         | 0.10715  |           |           |          |              |
| 89A ->104A         | 0.10178  |           |           |          |              |
| 91A ->105A         | 0.21748  |           |           |          |              |
| 94A ->106A         | 0.50279  |           |           |          |              |
| 96A ->107A         | -0.10159 |           |           |          |              |
| 99A ->106A         | -0.15328 |           |           |          |              |
| 87B ->106B         | 0.12436  |           |           |          |              |
| 89B ->103B         | -0.20852 |           |           |          |              |
| 90B ->103B         | 0.12677  |           |           |          |              |
| 93B ->106B         | 0.64118  |           |           |          |              |
| 96B ->107B         | 0.17046  |           |           |          |              |
| 97B ->107B         | -0.10472 |           |           |          |              |
| 98B ->108B         | 0.10775  |           |           |          |              |
| 99B ->106B         | -0.19959 |           |           |          |              |
| Excited State 140: | 2.893-A  | 5.9794 eV | 207.35 nm | f=0.0310 | <S**2>=1.843 |
| 89A ->104A         | 0.16229  |           |           |          |              |
| 89A ->108A         | 0.17405  |           |           |          |              |
| 91A ->107A         | 0.22552  |           |           |          |              |
| 96A ->107A         | -0.18449 |           |           |          |              |
| 97A ->107A         | 0.16736  |           |           |          |              |
| 98A ->108A         | 0.32405  |           |           |          |              |
| 89B ->103B         | -0.35589 |           |           |          |              |
| 89B ->108B         | -0.17135 |           |           |          |              |
| 90B ->103B         | 0.11792  |           |           |          |              |
| 91B ->107B         | -0.21375 |           |           |          |              |
| 96B ->107B         | -0.19951 |           |           |          |              |
| 97B ->107B         | 0.59088  |           |           |          |              |
| 98B ->108B         | -0.11649 |           |           |          |              |
| 100B ->111B        | 0.16180  |           |           |          |              |
| Excited State 151: | 2.642-A  | 6.0898 eV | 203.59 nm | f=0.0211 | <S**2>=1.495 |
| 90A ->105A         | -0.19238 |           |           |          |              |
| 93A ->104A         | -0.12916 |           |           |          |              |
| 95A ->110A         | -0.12709 |           |           |          |              |
| 97A ->108A         | 0.14813  |           |           |          |              |
| 98A ->107A         | 0.13970  |           |           |          |              |
| 102A ->111A        | -0.25197 |           |           |          |              |
| 89B ->107B         | -0.10924 |           |           |          |              |
| 90B ->104B         | 0.13924  |           |           |          |              |
| 91B ->108B         | -0.12070 |           |           |          |              |
| 94B ->105B         | -0.17386 |           |           |          |              |
| 96B ->105B         | 0.12559  |           |           |          |              |
| 96B ->108B         | -0.21871 |           |           |          |              |
| 97B ->108B         | 0.54189  |           |           |          |              |
| 102B ->112B        | -0.48800 |           |           |          |              |
| Excited State 152: | 2.352-A  | 6.0966 eV | 203.37 nm | f=0.0224 | <S**2>=1.133 |
| 98A ->112A         | 0.24454  |           |           |          |              |

|                                                                      |          |
|----------------------------------------------------------------------|----------|
| 100A ->112A                                                          | 0.88271  |
| 98B ->111B                                                           | 0.11177  |
| 100B ->111B                                                          | 0.31469  |
| Excited State 157: 2.577-A 6.1627 eV 201.18 nm f=0.0260 <S**2>=1.410 |          |
| 96A ->109A                                                           | -0.11877 |
| 97A ->109A                                                           | -0.17166 |
| 101A ->112A                                                          | 0.45514  |
| 102A ->113A                                                          | 0.67451  |
| 101B ->111B                                                          | 0.49814  |

---

**Table S15.** Electronic transitions computed by TD-DFT for the closed-shell singlet state of  $[\text{PtL}^+-\text{C1-MV}^+\cdot]^{2+}$ , for which part of the Gaussian output is shown. Relevant MO's are shown below:

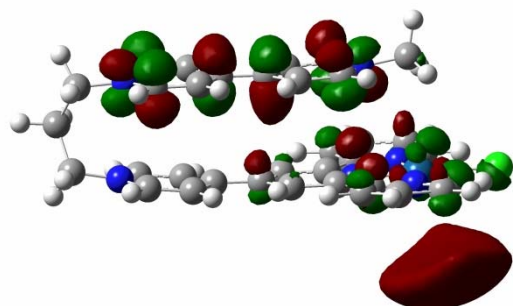

MO164 (LUMO+8)

MO162(LUMO+6)

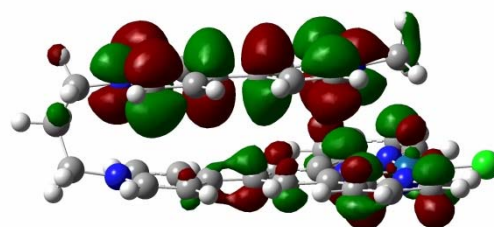

MO163 (LUMO+7)

MO161 (LUMO+5)

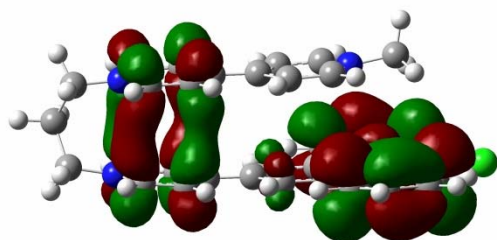

MO160 (LUMO+4)

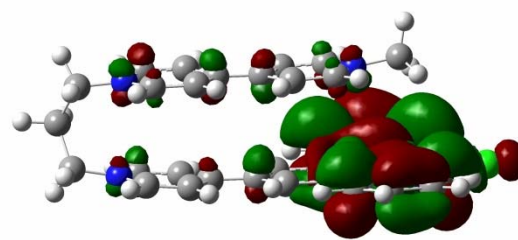

MO156 (LUMO)

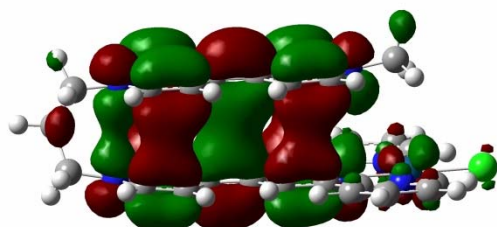

MO155 (HOMO)

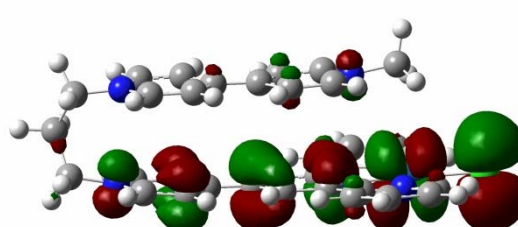

MO154 (HOMO-1)

---

Excitation energies and oscillator strengths ( $\lambda > 200$  nm,  $f > 0.02$  only):

|               |           |           |           |           |            |                                |
|---------------|-----------|-----------|-----------|-----------|------------|--------------------------------|
| Excited State | 2:        | Singlet-A | 1.4195 eV | 873.44 nm | $f=0.2739$ | $\langle S^{*2} \rangle=0.000$ |
|               | 155 ->156 | 0.72189   |           |           |            |                                |
|               | 155 <-156 | -0.18223  |           |           |            |                                |
| Excited State | 3:        | Singlet-A | 1.8338 eV | 676.09 nm | $f=0.3020$ | $\langle S^{*2} \rangle=0.000$ |
|               | 155 ->156 | 0.10378   |           |           |            |                                |
|               | 155 ->158 | 0.69569   |           |           |            |                                |
| Excited State | 7:        | Singlet-A | 2.5962 eV | 477.56 nm | $f=0.0418$ | $\langle S^{*2} \rangle=0.000$ |
|               | 155 ->160 | -0.28938  |           |           |            |                                |
|               | 155 ->161 | 0.62131   |           |           |            |                                |
|               | 155 ->162 | -0.11720  |           |           |            |                                |

|                   |           |           |           |          |              |
|-------------------|-----------|-----------|-----------|----------|--------------|
| Excited State 9:  | Singlet-A | 3.0348 eV | 408.54 nm | f=0.0925 | <S**2>=0.000 |
| 150 ->156         | -0.13373  |           |           |          |              |
| 154 ->156         | -0.25892  |           |           |          |              |
| 155 ->163         | 0.62175   |           |           |          |              |
| 155 ->164         | -0.12756  |           |           |          |              |
| Excited State 11: | Singlet-A | 3.2550 eV | 380.91 nm | f=0.2107 | <S**2>=0.000 |
| 150 ->156         | -0.11574  |           |           |          |              |
| 153 ->160         | 0.10356   |           |           |          |              |
| 154 ->156         | 0.57663   |           |           |          |              |
| 154 ->158         | -0.16100  |           |           |          |              |
| 155 ->163         | 0.16760   |           |           |          |              |
| 155 ->164         | -0.25134  |           |           |          |              |
| Excited State 21: | Singlet-A | 3.8146 eV | 325.02 nm | f=0.0784 | <S**2>=0.000 |
| 149 ->156         | 0.19190   |           |           |          |              |
| 150 ->156         | -0.10877  |           |           |          |              |
| 151 ->160         | -0.35829  |           |           |          |              |
| 151 ->161         | -0.18859  |           |           |          |              |
| 152 ->160         | 0.18172   |           |           |          |              |
| 154 ->158         | 0.40588   |           |           |          |              |
| 155 ->167         | -0.15813  |           |           |          |              |
| Excited State 22: | Singlet-A | 3.8157 eV | 324.93 nm | f=0.1040 | <S**2>=0.000 |
| 149 ->156         | -0.18337  |           |           |          |              |
| 151 ->160         | 0.32912   |           |           |          |              |
| 151 ->161         | 0.17191   |           |           |          |              |
| 152 ->160         | -0.16477  |           |           |          |              |
| 154 ->156         | 0.10891   |           |           |          |              |
| 154 ->158         | 0.44647   |           |           |          |              |
| 155 ->167         | -0.17353  |           |           |          |              |
| Excited State 23: | Singlet-A | 3.8997 eV | 317.93 nm | f=0.1498 | <S**2>=0.000 |
| 149 ->156         | 0.55303   |           |           |          |              |
| 149 ->160         | -0.16158  |           |           |          |              |
| 152 ->160         | -0.22894  |           |           |          |              |
| 152 ->161         | -0.17536  |           |           |          |              |
| 154 ->157         | 0.13157   |           |           |          |              |
| Excited State 24: | Singlet-A | 3.9027 eV | 317.69 nm | f=0.0352 | <S**2>=0.000 |
| 149 ->156         | 0.24215   |           |           |          |              |
| 149 ->160         | 0.31787   |           |           |          |              |
| 149 ->161         | 0.15702   |           |           |          |              |
| 151 ->160         | 0.30346   |           |           |          |              |
| 151 ->161         | 0.15386   |           |           |          |              |
| 152 ->160         | 0.36445   |           |           |          |              |
| 152 ->161         | 0.16059   |           |           |          |              |
| Excited State 25: | Singlet-A | 3.9620 eV | 312.94 nm | f=0.8606 | <S**2>=0.000 |
| 150 ->156         | 0.46687   |           |           |          |              |
| 151 ->157         | -0.16038  |           |           |          |              |
| 152 ->157         | 0.42242   |           |           |          |              |
| 155 ->168         | 0.13684   |           |           |          |              |

|                   |           |           |           |          |              |
|-------------------|-----------|-----------|-----------|----------|--------------|
| Excited State 26: | Singlet-A | 3.9747 eV | 311.93 nm | f=0.1289 | <S**2>=0.000 |
| 149 ->157         | 0.11250   |           |           |          |              |
| 150 ->156         | -0.35748  |           |           |          |              |
| 151 ->157         | -0.35723  |           |           |          |              |
| 152 ->157         | 0.36220   |           |           |          |              |
| 153 ->158         | -0.11568  |           |           |          |              |
| 155 ->167         | 0.10743   |           |           |          |              |
| 155 ->168         | -0.17755  |           |           |          |              |
| Excited State 27: | Singlet-A | 3.9901 eV | 310.73 nm | f=0.0996 | <S**2>=0.000 |
| 150 ->156         | -0.18585  |           |           |          |              |
| 155 ->168         | 0.66071   |           |           |          |              |
| Excited State 29: | Singlet-A | 4.0226 eV | 308.22 nm | f=0.0284 | <S**2>=0.000 |
| 149 ->157         | -0.10237  |           |           |          |              |
| 151 ->157         | -0.44722  |           |           |          |              |
| 152 ->157         | -0.20524  |           |           |          |              |
| 153 ->156         | 0.12267   |           |           |          |              |
| 153 ->158         | 0.45907   |           |           |          |              |
| Excited State 30: | Singlet-A | 4.0755 eV | 304.22 nm | f=0.0870 | <S**2>=0.000 |
| 148 ->156         | 0.61272   |           |           |          |              |
| 152 ->158         | -0.28649  |           |           |          |              |
| Excited State 33: | Singlet-A | 4.2839 eV | 289.42 nm | f=0.0238 | <S**2>=0.000 |
| 150 ->157         | 0.33071   |           |           |          |              |
| 155 ->169         | 0.34796   |           |           |          |              |
| 155 ->170         | 0.48299   |           |           |          |              |
| Excited State 35: | Singlet-A | 4.3212 eV | 286.92 nm | f=0.0778 | <S**2>=0.000 |
| 149 ->157         | 0.62925   |           |           |          |              |
| 150 ->158         | -0.11276  |           |           |          |              |
| 152 ->157         | -0.17175  |           |           |          |              |
| Excited State 38: | Singlet-A | 4.4907 eV | 276.09 nm | f=0.0474 | <S**2>=0.000 |
| 148 ->157         | 0.10784   |           |           |          |              |
| 149 ->158         | -0.10212  |           |           |          |              |
| 150 ->158         | 0.62361   |           |           |          |              |
| 155 ->171         | -0.19360  |           |           |          |              |
| Excited State 39: | Singlet-A | 4.5009 eV | 275.46 nm | f=0.0853 | <S**2>=0.000 |
| 147 ->156         | -0.14410  |           |           |          |              |
| 149 ->156         | 0.10026   |           |           |          |              |
| 149 ->158         | 0.64922   |           |           |          |              |
| Excited State 50: | Singlet-A | 4.9144 eV | 252.29 nm | f=0.1167 | <S**2>=0.000 |
| 146 ->157         | -0.24924  |           |           |          |              |
| 147 ->158         | 0.14881   |           |           |          |              |
| 149 ->158         | -0.10349  |           |           |          |              |
| 149 ->161         | 0.12893   |           |           |          |              |
| 152 ->160         | -0.29263  |           |           |          |              |
| 152 ->161         | 0.48413   |           |           |          |              |
| Excited State 55: | Singlet-A | 5.0576 eV | 245.14 nm | f=0.0610 | <S**2>=0.000 |

|                   |           |           |           |          |              |
|-------------------|-----------|-----------|-----------|----------|--------------|
| 147 ->157         | 0.58804   |           |           |          |              |
| 152 ->159         | 0.29388   |           |           |          |              |
| 152 ->162         | -0.12482  |           |           |          |              |
| Excited State 56: | Singlet-A | 5.1329 eV | 241.55 nm | f=0.1608 | <S**2>=0.000 |
| 143 ->156         | 0.27318   |           |           |          |              |
| 146 ->157         | 0.49506   |           |           |          |              |
| 150 ->159         | 0.21144   |           |           |          |              |
| 150 ->162         | 0.10099   |           |           |          |              |
| 152 ->161         | 0.17516   |           |           |          |              |
| 154 ->162         | -0.15082  |           |           |          |              |
| 154 ->165         | 0.14159   |           |           |          |              |
| Excited State 57: | Singlet-A | 5.1526 eV | 240.62 nm | f=0.1415 | <S**2>=0.000 |
| 143 ->156         | -0.30195  |           |           |          |              |
| 146 ->157         | 0.31840   |           |           |          |              |
| 150 ->159         | -0.16096  |           |           |          |              |
| 150 ->162         | -0.14405  |           |           |          |              |
| 152 ->161         | 0.14955   |           |           |          |              |
| 154 ->159         | 0.14009   |           |           |          |              |
| 154 ->162         | 0.10316   |           |           |          |              |
| 154 ->163         | 0.33085   |           |           |          |              |
| 154 ->164         | 0.16749   |           |           |          |              |
| 154 ->165         | -0.12904  |           |           |          |              |
| Excited State 58: | Singlet-A | 5.1563 eV | 240.45 nm | f=0.0648 | <S**2>=0.000 |
| 143 ->156         | 0.21874   |           |           |          |              |
| 146 ->157         | -0.19414  |           |           |          |              |
| 150 ->159         | 0.11647   |           |           |          |              |
| 154 ->163         | 0.49057   |           |           |          |              |
| 154 ->164         | 0.25625   |           |           |          |              |
| 154 ->165         | 0.10558   |           |           |          |              |
| Excited State 59: | Singlet-A | 5.2020 eV | 238.34 nm | f=0.0299 | <S**2>=0.000 |
| 145 ->157         | 0.50829   |           |           |          |              |
| 147 ->158         | 0.37708   |           |           |          |              |
| 152 ->161         | -0.12571  |           |           |          |              |
| Excited State 61: | Singlet-A | 5.2119 eV | 237.89 nm | f=0.0216 | <S**2>=0.000 |
| 142 ->156         | -0.17697  |           |           |          |              |
| 145 ->157         | 0.13299   |           |           |          |              |
| 145 ->158         | 0.20617   |           |           |          |              |
| 152 ->159         | 0.31849   |           |           |          |              |
| 152 ->162         | 0.36632   |           |           |          |              |
| 154 ->164         | 0.30875   |           |           |          |              |
| Excited State 64: | Singlet-A | 5.2849 eV | 234.60 nm | f=0.0262 | <S**2>=0.000 |
| 145 ->157         | -0.40199  |           |           |          |              |
| 147 ->158         | 0.51192   |           |           |          |              |
| 149 ->161         | -0.10708  |           |           |          |              |
| 154 ->165         | -0.16604  |           |           |          |              |
| Excited State 81: | Singlet-A | 5.5495 eV | 223.42 nm | f=0.0456 | <S**2>=0.000 |
| 150 ->161         | -0.18725  |           |           |          |              |



|                    |           |           |           |          |              |  |
|--------------------|-----------|-----------|-----------|----------|--------------|--|
|                    | 151 ->163 | 0.37428   |           |          |              |  |
|                    | 151 ->164 | 0.39576   |           |          |              |  |
|                    | 152 ->163 | 0.29336   |           |          |              |  |
|                    | 152 ->164 | -0.11792  |           |          |              |  |
| Excited State 87:  | Singlet-A | 5.6129 eV | 220.89 nm | f=0.0634 | <S**2>=0.000 |  |
|                    | 140 ->156 | 0.31444   |           |          |              |  |
|                    | 142 ->156 | -0.11102  |           |          |              |  |
|                    | 149 ->162 | -0.12830  |           |          |              |  |
|                    | 152 ->164 | 0.14063   |           |          |              |  |
|                    | 152 ->165 | 0.52808   |           |          |              |  |
| Excited State 99:  | Singlet-A | 5.8204 eV | 213.02 nm | f=0.0201 | <S**2>=0.000 |  |
|                    | 140 ->157 | -0.11841  |           |          |              |  |
|                    | 144 ->158 | 0.27699   |           |          |              |  |
|                    | 144 ->160 | 0.32122   |           |          |              |  |
|                    | 144 ->161 | 0.12445   |           |          |              |  |
|                    | 148 ->160 | -0.20945  |           |          |              |  |
|                    | 148 ->161 | 0.21594   |           |          |              |  |
|                    | 148 ->163 | 0.19578   |           |          |              |  |
|                    | 148 ->164 | -0.10248  |           |          |              |  |
|                    | 150 ->163 | -0.11765  |           |          |              |  |
|                    | 151 ->160 | -0.10365  |           |          |              |  |
| Excited State 120: | Singlet-A | 6.0646 eV | 204.44 nm | f=0.0314 | <S**2>=0.000 |  |
|                    | 135 ->156 | 0.12430   |           |          |              |  |
|                    | 138 ->156 | 0.43609   |           |          |              |  |
|                    | 140 ->157 | -0.31026  |           |          |              |  |
|                    | 147 ->160 | 0.11111   |           |          |              |  |
|                    | 148 ->161 | -0.10824  |           |          |              |  |
|                    | 148 ->163 | 0.21428   |           |          |              |  |
|                    | 148 ->164 | -0.10445  |           |          |              |  |
|                    | 149 ->163 | -0.15092  |           |          |              |  |
|                    | 149 ->164 | 0.17724   |           |          |              |  |
|                    | 149 ->165 | 0.10742   |           |          |              |  |
| Excited State 129: | Singlet-A | 6.1854 eV | 200.45 nm | f=0.0260 | <S**2>=0.000 |  |
|                    | 137 ->156 | -0.12069  |           |          |              |  |
|                    | 139 ->157 | -0.27103  |           |          |              |  |
|                    | 140 ->158 | -0.18911  |           |          |              |  |
|                    | 147 ->159 | 0.42431   |           |          |              |  |
|                    | 147 ->161 | 0.10558   |           |          |              |  |
|                    | 152 ->166 | 0.10657   |           |          |              |  |
|                    | 154 ->166 | 0.14565   |           |          |              |  |
|                    | 154 ->167 | -0.10943  |           |          |              |  |
|                    | 155 ->180 | -0.17508  |           |          |              |  |
| Excited State 130: | Singlet-A | 6.1881 eV | 200.36 nm | f=0.0290 | <S**2>=0.000 |  |
|                    | 137 ->156 | 0.15303   |           |          |              |  |
|                    | 139 ->157 | 0.37970   |           |          |              |  |
|                    | 140 ->157 | -0.10390  |           |          |              |  |
|                    | 140 ->158 | -0.13050  |           |          |              |  |
|                    | 147 ->159 | 0.33551   |           |          |              |  |
|                    | 152 ->167 | -0.14909  |           |          |              |  |

|           |          |
|-----------|----------|
| 154 ->167 | 0.12224  |
| 155 ->180 | -0.16483 |

---

**Table S16.** Electronic transitions computed by TD-DFT for the closed-shell singlet state of  $\text{HH}(\text{C}_2)\text{-}[\text{PtL}^+\text{-C1-MV}^+]_2^{4+}$ , for which part of the Gaussian output is shown. Relevant MO's are shown below:

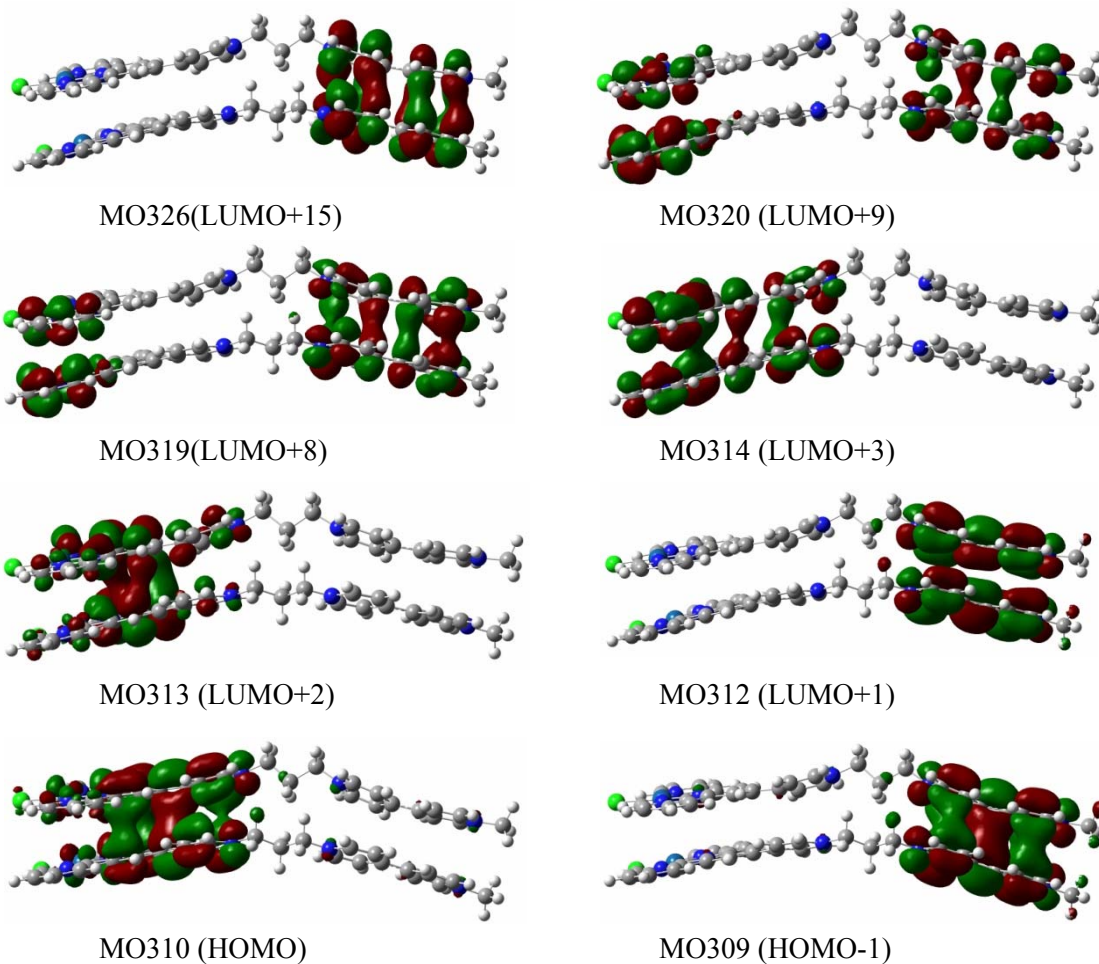


---

Excitation energies and oscillator strengths ( $\lambda > 200$  nm,  $f > 0.02$  only):

|               |            |           |           |            |          |              |
|---------------|------------|-----------|-----------|------------|----------|--------------|
| Excited State | 1:         | Singlet-A | 0.9079 eV | 1365.67 nm | f=0.0438 | <S**2>=0.000 |
|               | 310 -> 311 | 0.58277   |           |            |          |              |
|               | 310 -> 313 | -0.36875  |           |            |          |              |
|               | 310 -> 314 | -0.15936  |           |            |          |              |
|               | 310 <- 311 | -0.13605  |           |            |          |              |
| Excited State | 3:         | Singlet-A | 1.2201 eV | 1016.19 nm | f=0.0830 | <S**2>=0.000 |
|               | 309 -> 311 | 0.30225   |           |            |          |              |
|               | 310 -> 311 | 0.35440   |           |            |          |              |
|               | 310 -> 312 | 0.18332   |           |            |          |              |
|               | 310 -> 313 | 0.47335   |           |            |          |              |
|               | 310 -> 314 | 0.16228   |           |            |          |              |
|               | 310 <- 311 | -0.11801  |           |            |          |              |
| Excited State | 4:         | Singlet-A | 1.2779 eV | 970.23 nm  | f=0.0221 | <S**2>=0.000 |

|                   |           |           |           |          |              |  |
|-------------------|-----------|-----------|-----------|----------|--------------|--|
| 310 -> 312        | 0.67618   |           |           |          |              |  |
| 310 -> 313        | -0.15600  |           |           |          |              |  |
| Excited State 5:  | Singlet-A | 1.4925 eV | 830.70 nm | f=0.2249 | <S**2>=0.000 |  |
| 309 -> 312        | 0.72475   |           |           |          |              |  |
| 309 -> 312        | -0.20980  |           |           |          |              |  |
| Excited State 7:  | Singlet-A | 1.6137 eV | 768.34 nm | f=0.5689 | <S**2>=0.000 |  |
| 310 -> 313        | -0.24772  |           |           |          |              |  |
| 310 -> 314        | 0.64873   |           |           |          |              |  |
| Excited State 10: | Singlet-A | 1.8786 eV | 659.99 nm | f=0.0474 | <S**2>=0.000 |  |
| 310 -> 315        | 0.33840   |           |           |          |              |  |
| 310 -> 316        | 0.59921   |           |           |          |              |  |
| Excited State 17: | Singlet-A | 2.4267 eV | 510.91 nm | f=0.0239 | <S**2>=0.000 |  |
| 309 -> 318        | 0.10464   |           |           |          |              |  |
| 310 -> 318        | 0.61584   |           |           |          |              |  |
| 310 -> 320        | -0.15446  |           |           |          |              |  |
| 310 -> 325        | 0.25361   |           |           |          |              |  |
| Excited State 21: | Singlet-A | 2.6558 eV | 466.85 nm | f=0.2041 | <S**2>=0.000 |  |
| 301 -> 312        | -0.11844  |           |           |          |              |  |
| 308 -> 311        | 0.21560   |           |           |          |              |  |
| 309 -> 319        | -0.29578  |           |           |          |              |  |
| 309 -> 320        | -0.23004  |           |           |          |              |  |
| 309 -> 326        | 0.48927   |           |           |          |              |  |
| 310 -> 319        | 0.11423   |           |           |          |              |  |
| 310 -> 326        | -0.12328  |           |           |          |              |  |
| Excited State 24: | Singlet-A | 2.7367 eV | 453.05 nm | f=0.3470 | <S**2>=0.000 |  |
| 301 -> 312        | 0.15997   |           |           |          |              |  |
| 309 -> 319        | 0.33002   |           |           |          |              |  |
| 309 -> 320        | 0.24553   |           |           |          |              |  |
| 309 -> 326        | 0.42934   |           |           |          |              |  |
| 309 -> 331        | -0.11225  |           |           |          |              |  |
| 310 -> 319        | -0.21735  |           |           |          |              |  |
| 310 -> 320        | -0.17803  |           |           |          |              |  |
| 310 -> 326        | -0.10233  |           |           |          |              |  |
| Excited State 26: | Singlet-A | 2.7923 eV | 444.02 nm | f=0.0230 | <S**2>=0.000 |  |
| 309 -> 319        | 0.24217   |           |           |          |              |  |
| 309 -> 320        | 0.18578   |           |           |          |              |  |
| 310 -> 319        | 0.48138   |           |           |          |              |  |
| 310 -> 320        | 0.38402   |           |           |          |              |  |
| Excited State 27: | Singlet-A | 2.9356 eV | 422.35 nm | f=0.0933 | <S**2>=0.000 |  |
| 307 -> 311        | -0.44046  |           |           |          |              |  |
| 308 -> 311        | -0.11852  |           |           |          |              |  |
| 309 -> 318        | 0.45620   |           |           |          |              |  |
| 309 -> 321        | -0.10439  |           |           |          |              |  |
| 309 -> 325        | -0.13242  |           |           |          |              |  |
| 310 -> 318        | -0.10480  |           |           |          |              |  |

|                   |           |           |           |          |              |
|-------------------|-----------|-----------|-----------|----------|--------------|
| Excited State 28: | Singlet-A | 2.9377 eV | 422.05 nm | f=0.0994 | <S**2>=0.000 |
| 307 -> 311        | 0.46224   |           |           |          |              |
| 308 -> 311        | 0.12452   |           |           |          |              |
| 309 -> 318        | 0.43091   |           |           |          |              |
| 309 -> 321        | -0.12637  |           |           |          |              |
| 309 -> 325        | -0.14329  |           |           |          |              |
| Excited State 31: | Singlet-A | 3.0019 eV | 413.01 nm | f=0.0362 | <S**2>=0.000 |
| 309 -> 320        | 0.11253   |           |           |          |              |
| 309 -> 330        | -0.30167  |           |           |          |              |
| 309 -> 331        | 0.58980   |           |           |          |              |
| 310 -> 331        | -0.14975  |           |           |          |              |
| Excited State 41: | Singlet-A | 3.3097 eV | 374.61 nm | f=0.0274 | <S**2>=0.000 |
| 302 -> 311        | 0.11435   |           |           |          |              |
| 307 -> 313        | 0.55717   |           |           |          |              |
| 308 -> 313        | 0.11718   |           |           |          |              |
| 308 -> 314        | 0.14365   |           |           |          |              |
| 310 -> 332        | 0.29792   |           |           |          |              |
| Excited State 45: | Singlet-A | 3.3469 eV | 370.44 nm | f=0.1832 | <S**2>=0.000 |
| 302 -> 311        | 0.18104   |           |           |          |              |
| 307 -> 313        | -0.30398  |           |           |          |              |
| 308 -> 320        | -0.11308  |           |           |          |              |
| 308 -> 321        | -0.20123  |           |           |          |              |
| 310 -> 332        | 0.43706   |           |           |          |              |
| Excited State 51: | Singlet-A | 3.4265 eV | 361.84 nm | f=0.1416 | <S**2>=0.000 |
| 299 -> 322        | -0.14196  |           |           |          |              |
| 300 -> 322        | 0.13848   |           |           |          |              |
| 307 -> 311        | 0.10586   |           |           |          |              |
| 307 -> 314        | -0.11032  |           |           |          |              |
| 307 -> 321        | 0.12091   |           |           |          |              |
| 307 -> 322        | -0.13298  |           |           |          |              |
| 308 -> 320        | -0.12763  |           |           |          |              |
| 308 -> 321        | -0.28169  |           |           |          |              |
| 308 -> 322        | 0.30131   |           |           |          |              |
| 308 -> 325        | 0.10563   |           |           |          |              |
| 310 -> 332        | -0.27926  |           |           |          |              |
| Excited State 56: | Singlet-A | 3.5774 eV | 346.57 nm | f=0.0421 | <S**2>=0.000 |
| 299 -> 311        | -0.23350  |           |           |          |              |
| 300 -> 311        | 0.38004   |           |           |          |              |
| 306 -> 313        | -0.35893  |           |           |          |              |
| 307 -> 315        | 0.15403   |           |           |          |              |
| 308 -> 312        | -0.10206  |           |           |          |              |
| 308 -> 314        | -0.22281  |           |           |          |              |
| 308 -> 315        | -0.10060  |           |           |          |              |
| Excited State 62: | Singlet-A | 3.6339 eV | 341.18 nm | f=0.0272 | <S**2>=0.000 |
| 307 -> 312        | 0.65455   |           |           |          |              |
| 310 -> 331        | 0.16304   |           |           |          |              |
| Excited State 64: | Singlet-A | 3.6534 eV | 339.37 nm | f=0.0364 | <S**2>=0.000 |

|                   |           |           |           |          |              |
|-------------------|-----------|-----------|-----------|----------|--------------|
| 299 -> 311        | 0.12595   |           |           |          |              |
| 300 -> 311        | 0.10817   |           |           |          |              |
| 305 -> 313        | 0.46372   |           |           |          |              |
| 306 -> 313        | -0.20357  |           |           |          |              |
| 307 -> 315        | -0.14102  |           |           |          |              |
| 310 -> 330        | -0.12917  |           |           |          |              |
| 310 -> 331        | -0.20315  |           |           |          |              |
| 310 -> 334        | 0.18823   |           |           |          |              |
| Excited State 66: | Singlet-A | 3.7058 eV | 334.57 nm | f=0.1147 | <S**2>=0.000 |
| 299 -> 311        | 0.41012   |           |           |          |              |
| 305 -> 313        | -0.15402  |           |           |          |              |
| 306 -> 313        | -0.21998  |           |           |          |              |
| 306 -> 314        | 0.31499   |           |           |          |              |
| 307 -> 315        | -0.10749  |           |           |          |              |
| 310 -> 334        | -0.23849  |           |           |          |              |
| Excited State 67: | Singlet-A | 3.7293 eV | 332.46 nm | f=0.0823 | <S**2>=0.000 |
| 299 -> 311        | -0.39176  |           |           |          |              |
| 300 -> 311        | -0.11048  |           |           |          |              |
| 302 -> 311        | -0.10538  |           |           |          |              |
| 304 -> 322        | -0.10565  |           |           |          |              |
| 305 -> 313        | 0.11502   |           |           |          |              |
| 305 -> 314        | -0.22490  |           |           |          |              |
| 306 -> 314        | 0.40725   |           |           |          |              |
| Excited State 68: | Singlet-A | 3.7682 eV | 329.03 nm | f=0.1307 | <S**2>=0.000 |
| 305 -> 313        | -0.25598  |           |           |          |              |
| 305 -> 314        | 0.29644   |           |           |          |              |
| 306 -> 314        | 0.19989   |           |           |          |              |
| 307 -> 315        | -0.19509  |           |           |          |              |
| 308 -> 315        | -0.12485  |           |           |          |              |
| 308 -> 316        | -0.13133  |           |           |          |              |
| 310 -> 334        | 0.37764   |           |           |          |              |
| Excited State 69: | Singlet-A | 3.7928 eV | 326.89 nm | f=0.0403 | <S**2>=0.000 |
| 299 -> 311        | 0.11118   |           |           |          |              |
| 303 -> 321        | 0.12611   |           |           |          |              |
| 305 -> 313        | -0.19183  |           |           |          |              |
| 305 -> 314        | -0.39489  |           |           |          |              |
| 307 -> 315        | 0.15030   |           |           |          |              |
| 310 -> 334        | 0.40093   |           |           |          |              |
| Excited State 75: | Singlet-A | 3.8653 eV | 320.76 nm | f=0.0872 | <S**2>=0.000 |
| 303 -> 321        | -0.16713  |           |           |          |              |
| 304 -> 313        | 0.14206   |           |           |          |              |
| 304 -> 322        | -0.23704  |           |           |          |              |
| 305 -> 314        | 0.14798   |           |           |          |              |
| 306 -> 314        | 0.19703   |           |           |          |              |
| 306 -> 315        | -0.10179  |           |           |          |              |
| 307 -> 315        | 0.37595   |           |           |          |              |
| 307 -> 316        | -0.15043  |           |           |          |              |
| 308 -> 315        | 0.14367   |           |           |          |              |

|                   |           |           |           |          |              |
|-------------------|-----------|-----------|-----------|----------|--------------|
| Excited State 77: | Singlet-A | 3.8951 eV | 318.31 nm | f=1.5320 | <S**2>=0.000 |
| 296 -> 311        | -0.16490  |           |           |          |              |
| 297 -> 311        | 0.14345   |           |           |          |              |
| 301 -> 311        | 0.20280   |           |           |          |              |
| 301 -> 312        | 0.44756   |           |           |          |              |
| 302 -> 313        | 0.28227   |           |           |          |              |
| 307 -> 316        | -0.17832  |           |           |          |              |
| 309 -> 319        | -0.11487  |           |           |          |              |
| Excited State 79: | Singlet-A | 3.9037 eV | 317.60 nm | f=0.2031 | <S**2>=0.000 |
| 296 -> 311        | 0.13761   |           |           |          |              |
| 300 -> 321        | -0.14226  |           |           |          |              |
| 300 -> 322        | -0.10792  |           |           |          |              |
| 301 -> 312        | -0.20521  |           |           |          |              |
| 302 -> 313        | 0.29081   |           |           |          |              |
| 302 -> 320        | 0.11772   |           |           |          |              |
| 302 -> 321        | 0.21961   |           |           |          |              |
| 302 -> 322        | -0.15848  |           |           |          |              |
| 303 -> 313        | -0.20133  |           |           |          |              |
| 305 -> 314        | 0.14446   |           |           |          |              |
| 305 -> 322        | 0.12807   |           |           |          |              |
| 307 -> 316        | 0.10511   |           |           |          |              |
| Excited State 81: | Singlet-A | 3.9147 eV | 316.72 nm | f=0.0279 | <S**2>=0.000 |
| 296 -> 311        | 0.10628   |           |           |          |              |
| 300 -> 321        | 0.12346   |           |           |          |              |
| 302 -> 313        | 0.46435   |           |           |          |              |
| 302 -> 321        | -0.18451  |           |           |          |              |
| 303 -> 313        | 0.27890   |           |           |          |              |
| 305 -> 321        | -0.10463  |           |           |          |              |
| Excited State 82: | Singlet-A | 3.9409 eV | 314.61 nm | f=0.0491 | <S**2>=0.000 |
| 296 -> 311        | 0.19664   |           |           |          |              |
| 297 -> 311        | 0.58890   |           |           |          |              |
| 302 -> 313        | -0.14456  |           |           |          |              |
| 307 -> 316        | -0.13237  |           |           |          |              |
| Excited State 84: | Singlet-A | 3.9770 eV | 311.76 nm | f=0.1210 | <S**2>=0.000 |
| 296 -> 311        | 0.25274   |           |           |          |              |
| 301 -> 312        | 0.31329   |           |           |          |              |
| 307 -> 315        | 0.18505   |           |           |          |              |
| 307 -> 316        | 0.42760   |           |           |          |              |
| 308 -> 316        | 0.15100   |           |           |          |              |
| Excited State 85: | Singlet-A | 4.0041 eV | 309.64 nm | f=0.0200 | <S**2>=0.000 |
| 302 -> 314        | -0.25983  |           |           |          |              |
| 304 -> 311        | -0.10676  |           |           |          |              |
| 304 -> 313        | -0.24949  |           |           |          |              |
| 304 -> 314        | 0.46095   |           |           |          |              |
| 304 -> 316        | 0.11366   |           |           |          |              |
| 310 -> 336        | -0.17393  |           |           |          |              |
| Excited State 88: | Singlet-A | 4.0492 eV | 306.20 nm | f=0.0299 | <S**2>=0.000 |
| 296 -> 311        | -0.18746  |           |           |          |              |

|                    |           |           |           |          |              |  |
|--------------------|-----------|-----------|-----------|----------|--------------|--|
| 298 -> 312         | -0.15954  |           |           |          |              |  |
| 301 -> 311         | 0.48783   |           |           |          |              |  |
| 301 -> 312         | -0.20856  |           |           |          |              |  |
| 304 -> 314         | 0.10344   |           |           |          |              |  |
| 306 -> 315         | 0.21260   |           |           |          |              |  |
| 307 -> 315         | 0.10149   |           |           |          |              |  |
| 307 -> 316         | 0.19272   |           |           |          |              |  |
| Excited State 89:  | Singlet-A | 4.0592 eV | 305.44 nm | f=0.0328 | <S**2>=0.000 |  |
| 298 -> 311         | 0.11608   |           |           |          |              |  |
| 298 -> 312         | 0.66208   |           |           |          |              |  |
| 301 -> 311         | 0.13126   |           |           |          |              |  |
| Excited State 92:  | Singlet-A | 4.0869 eV | 303.37 nm | f=0.1982 | <S**2>=0.000 |  |
| 296 -> 311         | 0.42587   |           |           |          |              |  |
| 297 -> 311         | -0.19375  |           |           |          |              |  |
| 301 -> 311         | 0.39262   |           |           |          |              |  |
| 307 -> 315         | -0.10698  |           |           |          |              |  |
| 307 -> 316         | -0.17910  |           |           |          |              |  |
| 310 -> 336         | 0.13623   |           |           |          |              |  |
| Excited State 93:  | Singlet-A | 4.0975 eV | 302.59 nm | f=0.1247 | <S**2>=0.000 |  |
| 296 -> 311         | -0.10648  |           |           |          |              |  |
| 302 -> 314         | -0.31802  |           |           |          |              |  |
| 307 -> 316         | 0.11167   |           |           |          |              |  |
| 310 -> 336         | 0.52564   |           |           |          |              |  |
| 310 -> 337         | 0.13381   |           |           |          |              |  |
| Excited State 95:  | Singlet-A | 4.1680 eV | 297.47 nm | f=0.0248 | <S**2>=0.000 |  |
| 300 -> 314         | -0.20283  |           |           |          |              |  |
| 302 -> 314         | -0.16250  |           |           |          |              |  |
| 305 -> 315         | -0.38405  |           |           |          |              |  |
| 306 -> 315         | 0.20476   |           |           |          |              |  |
| 306 -> 316         | 0.39664   |           |           |          |              |  |
| Excited State 97:  | Singlet-A | 4.1891 eV | 295.97 nm | f=0.0314 | <S**2>=0.000 |  |
| 299 -> 313         | -0.25807  |           |           |          |              |  |
| 300 -> 314         | 0.14492   |           |           |          |              |  |
| 305 -> 315         | 0.38108   |           |           |          |              |  |
| 306 -> 316         | 0.40037   |           |           |          |              |  |
| 310 -> 335         | 0.16354   |           |           |          |              |  |
| Excited State 102: | Singlet-A | 4.2368 eV | 292.63 nm | f=0.0413 | <S**2>=0.000 |  |
| 295 -> 311         | 0.13644   |           |           |          |              |  |
| 295 -> 312         | 0.67444   |           |           |          |              |  |
| Excited State 109: | Singlet-A | 4.3518 eV | 284.90 nm | f=0.0237 | <S**2>=0.000 |  |
| 294 -> 311         | 0.65913   |           |           |          |              |  |
| Excited State 112: | Singlet-A | 4.3680 eV | 283.85 nm | f=0.0256 | <S**2>=0.000 |  |
| 293 -> 311         | 0.64892   |           |           |          |              |  |
| 310 -> 337         | 0.16856   |           |           |          |              |  |
| Excited State 120: | Singlet-A | 4.4903 eV | 276.11 nm | f=0.2218 | <S**2>=0.000 |  |



|                    |           |           |           |          |              |
|--------------------|-----------|-----------|-----------|----------|--------------|
| 297 -> 313         | 0.57254   |           |           |          |              |
| 307 -> 318         | -0.23842  |           |           |          |              |
| Excited State 122: | Singlet-A | 4.5246 eV | 274.02 nm | f=0.0387 | <S**2>=0.000 |
| 295 -> 311         | 0.15290   |           |           |          |              |
| 296 -> 313         | 0.33781   |           |           |          |              |
| 299 -> 312         | -0.27164  |           |           |          |              |
| 300 -> 315         | -0.17646  |           |           |          |              |
| 301 -> 313         | -0.10349  |           |           |          |              |
| 304 -> 316         | -0.14587  |           |           |          |              |
| 307 -> 318         | 0.34344   |           |           |          |              |
| Excited State 133: | Singlet-A | 4.5811 eV | 270.65 nm | f=0.0501 | <S**2>=0.000 |
| 291 -> 311         | 0.25949   |           |           |          |              |
| 291 -> 312         | 0.15351   |           |           |          |              |
| 292 -> 312         | 0.57952   |           |           |          |              |
| 296 -> 312         | -0.10356  |           |           |          |              |
| 307 -> 323         | 0.10824   |           |           |          |              |
| Excited State 134: | Singlet-A | 4.5961 eV | 269.76 nm | f=0.1039 | <S**2>=0.000 |
| 296 -> 314         | 0.19911   |           |           |          |              |
| 297 -> 314         | 0.55247   |           |           |          |              |
| 299 -> 315         | -0.12195  |           |           |          |              |
| 300 -> 316         | -0.10122  |           |           |          |              |
| 307 -> 323         | -0.12077  |           |           |          |              |
| Excited State 144: | Singlet-A | 4.6978 eV | 263.92 nm | f=0.0359 | <S**2>=0.000 |
| 296 -> 314         | -0.13116  |           |           |          |              |
| 297 -> 312         | -0.10686  |           |           |          |              |
| 299 -> 315         | 0.12727   |           |           |          |              |
| 300 -> 316         | -0.28767  |           |           |          |              |
| 306 -> 318         | -0.15883  |           |           |          |              |
| 307 -> 324         | -0.25930  |           |           |          |              |
| 310 -> 340         | 0.21849   |           |           |          |              |
| 310 -> 342         | 0.32011   |           |           |          |              |
| Excited State 152: | Singlet-A | 4.7917 eV | 258.75 nm | f=0.0252 | <S**2>=0.000 |
| 290 -> 311         | -0.26795  |           |           |          |              |
| 294 -> 313         | 0.45137   |           |           |          |              |
| 306 -> 319         | -0.16572  |           |           |          |              |
| 306 -> 320         | 0.20985   |           |           |          |              |
| 306 -> 321         | -0.16872  |           |           |          |              |
| 306 -> 322         | -0.10220  |           |           |          |              |
| 306 -> 323         | -0.16234  |           |           |          |              |
| 307 -> 324         | 0.14278   |           |           |          |              |
| Excited State 165: | Singlet-A | 4.9309 eV | 251.44 nm | f=0.0262 | <S**2>=0.000 |
| 288 -> 311         | -0.26136  |           |           |          |              |
| 303 -> 318         | 0.41352   |           |           |          |              |
| 303 -> 319         | -0.13314  |           |           |          |              |
| 303 -> 323         | -0.20668  |           |           |          |              |
| 304 -> 318         | 0.15060   |           |           |          |              |
| 305 -> 323         | -0.14971  |           |           |          |              |
| 306 -> 323         | 0.12607   |           |           |          |              |

|                    |           |           |           |          |              |
|--------------------|-----------|-----------|-----------|----------|--------------|
| 306 -> 324         | 0.12386   |           |           |          |              |
| Excited State 166: | Singlet-A | 4.9384 eV | 251.06 nm | f=0.0325 | <S**2>=0.000 |
| 288 -> 311         | -0.17928  |           |           |          |              |
| 293 -> 312         | -0.13882  |           |           |          |              |
| 293 -> 313         | -0.16188  |           |           |          |              |
| 297 -> 315         | 0.41066   |           |           |          |              |
| 299 -> 316         | -0.14728  |           |           |          |              |
| 305 -> 321         | 0.10849   |           |           |          |              |
| 305 -> 323         | 0.18822   |           |           |          |              |
| 306 -> 324         | 0.13560   |           |           |          |              |
| Excited State 169: | Singlet-A | 4.9549 eV | 250.23 nm | f=0.0873 | <S**2>=0.000 |
| 287 -> 311         | 0.11684   |           |           |          |              |
| 291 -> 311         | 0.11709   |           |           |          |              |
| 292 -> 311         | 0.30783   |           |           |          |              |
| 294 -> 314         | 0.10003   |           |           |          |              |
| 296 -> 315         | -0.19760  |           |           |          |              |
| 302 -> 318         | -0.10551  |           |           |          |              |
| 304 -> 318         | 0.10631   |           |           |          |              |
| 305 -> 324         | -0.11601  |           |           |          |              |
| 306 -> 324         | 0.22790   |           |           |          |              |
| 308 -> 317         | -0.16179  |           |           |          |              |
| 308 -> 325         | 0.14974   |           |           |          |              |
| Excited State 170: | Singlet-A | 4.9563 eV | 250.15 nm | f=0.0301 | <S**2>=0.000 |
| 287 -> 311         | -0.11868  |           |           |          |              |
| 288 -> 311         | -0.15326  |           |           |          |              |
| 291 -> 311         | 0.17037   |           |           |          |              |
| 292 -> 311         | 0.39216   |           |           |          |              |
| 293 -> 313         | -0.10528  |           |           |          |              |
| 296 -> 315         | -0.13503  |           |           |          |              |
| 297 -> 315         | -0.14368  |           |           |          |              |
| 305 -> 323         | 0.13929   |           |           |          |              |
| 308 -> 317         | 0.24293   |           |           |          |              |
| 308 -> 325         | -0.20927  |           |           |          |              |
| Excited State 172: | Singlet-A | 4.9626 eV | 249.84 nm | f=0.0805 | <S**2>=0.000 |
| 287 -> 311         | -0.14904  |           |           |          |              |
| 288 -> 311         | 0.14908   |           |           |          |              |
| 292 -> 311         | -0.13188  |           |           |          |              |
| 305 -> 323         | -0.10642  |           |           |          |              |
| 305 -> 324         | -0.11512  |           |           |          |              |
| 306 -> 324         | 0.18826   |           |           |          |              |
| 308 -> 317         | 0.40140   |           |           |          |              |
| 308 -> 325         | -0.19685  |           |           |          |              |
| Excited State 176: | Singlet-A | 4.9895 eV | 248.49 nm | f=0.0308 | <S**2>=0.000 |
| 288 -> 311         | 0.13899   |           |           |          |              |
| 293 -> 313         | 0.16100   |           |           |          |              |
| 296 -> 315         | -0.24514  |           |           |          |              |
| 297 -> 315         | 0.21604   |           |           |          |              |
| 301 -> 315         | 0.12895   |           |           |          |              |
| 305 -> 323         | 0.17855   |           |           |          |              |

|                    |           |           |           |          |              |
|--------------------|-----------|-----------|-----------|----------|--------------|
| 306 -> 323         | 0.29810   |           |           |          |              |
| 306 -> 324         | -0.20657  |           |           |          |              |
| 307 -> 318         | 0.11499   |           |           |          |              |
| 307 -> 324         | 0.10630   |           |           |          |              |
| Excited State 177: | Singlet-A | 4.9956 eV | 248.19 nm | f=0.0088 | <S**2>=0.000 |
| 293 -> 313         | -0.35665  |           |           |          |              |
| 296 -> 315         | -0.12694  |           |           |          |              |
| 297 -> 316         | -0.10795  |           |           |          |              |
| 298 -> 313         | 0.23493   |           |           |          |              |
| 299 -> 322         | 0.10847   |           |           |          |              |
| 300 -> 322         | -0.11691  |           |           |          |              |
| 305 -> 323         | -0.10797  |           |           |          |              |
| 308 -> 317         | 0.19673   |           |           |          |              |
| 308 -> 325         | 0.36767   |           |           |          |              |
| Excited State 179: | Singlet-A | 5.0016 eV | 247.89 nm | f=0.0418 | <S**2>=0.000 |
| 284 -> 311         | 0.19514   |           |           |          |              |
| 293 -> 313         | -0.11332  |           |           |          |              |
| 296 -> 315         | 0.14113   |           |           |          |              |
| 302 -> 318         | -0.14226  |           |           |          |              |
| 303 -> 318         | -0.20642  |           |           |          |              |
| 303 -> 319         | -0.20200  |           |           |          |              |
| 303 -> 320         | 0.27636   |           |           |          |              |
| 303 -> 321         | -0.20963  |           |           |          |              |
| 303 -> 322         | -0.13493  |           |           |          |              |
| 303 -> 323         | -0.14330  |           |           |          |              |
| 303 -> 324         | -0.13573  |           |           |          |              |
| 304 -> 324         | -0.13248  |           |           |          |              |
| 305 -> 323         | 0.10581   |           |           |          |              |
| 305 -> 324         | -0.15272  |           |           |          |              |
| Excited State 181: | Singlet-A | 5.0125 eV | 247.35 nm | f=0.0528 | <S**2>=0.000 |
| 296 -> 315         | 0.16581   |           |           |          |              |
| 296 -> 316         | -0.11497  |           |           |          |              |
| 297 -> 316         | 0.13293   |           |           |          |              |
| 302 -> 318         | -0.17182  |           |           |          |              |
| 303 -> 318         | 0.16618   |           |           |          |              |
| 303 -> 319         | 0.11770   |           |           |          |              |
| 303 -> 320         | -0.16869  |           |           |          |              |
| 303 -> 321         | 0.13094   |           |           |          |              |
| 305 -> 323         | 0.14881   |           |           |          |              |
| 305 -> 324         | -0.19095  |           |           |          |              |
| 306 -> 324         | -0.10559  |           |           |          |              |
| 308 -> 325         | 0.23992   |           |           |          |              |
| Excited State 198: | Singlet-A | 5.1074 eV | 242.75 nm | f=0.0399 | <S**2>=0.000 |
| 294 -> 314         | -0.13124  |           |           |          |              |
| 294 -> 315         | -0.10784  |           |           |          |              |
| 300 -> 318         | 0.16254   |           |           |          |              |
| 302 -> 318         | -0.26323  |           |           |          |              |
| 302 -> 320         | 0.15928   |           |           |          |              |
| 302 -> 321         | -0.13731  |           |           |          |              |
| 305 -> 318         | 0.10304   |           |           |          |              |

|                    |           |           |           |          |              |
|--------------------|-----------|-----------|-----------|----------|--------------|
| 305 -> 324         | 0.47527   |           |           |          |              |
| Excited State 212: | Singlet-A | 5.1775 eV | 239.47 nm | f=0.0244 | <S**2>=0.000 |
| 290 -> 313         | 0.14525   |           |           |          |              |
| 296 -> 316         | 0.17663   |           |           |          |              |
| 297 -> 316         | -0.12238  |           |           |          |              |
| 300 -> 318         | 0.31052   |           |           |          |              |
| 301 -> 316         | 0.34967   |           |           |          |              |
| 302 -> 323         | 0.23967   |           |           |          |              |
| 307 -> 327         | -0.19383  |           |           |          |              |
| 308 -> 327         | -0.13106  |           |           |          |              |
| Excited State 221: | Singlet-A | 5.2283 eV | 237.14 nm | f=0.0615 | <S**2>=0.000 |
| 290 -> 313         | 0.10955   |           |           |          |              |
| 294 -> 315         | -0.13756  |           |           |          |              |
| 300 -> 318         | -0.16169  |           |           |          |              |
| 300 -> 319         | 0.12945   |           |           |          |              |
| 300 -> 320         | -0.12337  |           |           |          |              |
| 300 -> 321         | 0.10904   |           |           |          |              |
| 300 -> 323         | 0.20302   |           |           |          |              |
| 302 -> 323         | 0.18675   |           |           |          |              |
| 302 -> 324         | 0.25127   |           |           |          |              |
| 303 -> 324         | -0.18002  |           |           |          |              |
| 306 -> 327         | 0.10607   |           |           |          |              |
| 307 -> 328         | -0.12107  |           |           |          |              |
| 308 -> 328         | -0.16930  |           |           |          |              |
| Excited State 222: | Singlet-A | 5.2331 eV | 236.92 nm | f=0.0292 | <S**2>=0.000 |
| 300 -> 318         | -0.11947  |           |           |          |              |
| 300 -> 319         | 0.10436   |           |           |          |              |
| 300 -> 324         | 0.11582   |           |           |          |              |
| 302 -> 323         | 0.13839   |           |           |          |              |
| 303 -> 318         | -0.20112  |           |           |          |              |
| 303 -> 323         | -0.28144  |           |           |          |              |
| 303 -> 324         | 0.44046   |           |           |          |              |
| 304 -> 324         | 0.13873   |           |           |          |              |
| Excited State 223: | Singlet-A | 5.2376 eV | 236.72 nm | f=0.1918 | <S**2>=0.000 |
| 282 -> 311         | -0.12059  |           |           |          |              |
| 290 -> 313         | 0.30343   |           |           |          |              |
| 291 -> 312         | 0.33714   |           |           |          |              |
| 291 -> 314         | -0.13571  |           |           |          |              |
| 292 -> 312         | -0.10356  |           |           |          |              |
| 294 -> 315         | -0.24949  |           |           |          |              |
| 300 -> 318         | -0.12099  |           |           |          |              |
| 302 -> 324         | -0.10074  |           |           |          |              |
| Excited State 224: | Singlet-A | 5.2406 eV | 236.58 nm | f=0.0527 | <S**2>=0.000 |
| 280 -> 311         | 0.14748   |           |           |          |              |
| 290 -> 313         | -0.17607  |           |           |          |              |
| 291 -> 312         | 0.49148   |           |           |          |              |
| 292 -> 312         | -0.15106  |           |           |          |              |
| 294 -> 315         | 0.13022   |           |           |          |              |
| 300 -> 323         | 0.10013   |           |           |          |              |

|                    |           |           |           |          |              |
|--------------------|-----------|-----------|-----------|----------|--------------|
| 302 -> 324         | 0.16985   |           |           |          |              |
| 303 -> 324         | 0.11203   |           |           |          |              |
| Excited State 225: | Singlet-A | 5.2477 eV | 236.26 nm | f=0.0201 | <S**2>=0.000 |
| 280 -> 311         | 0.13672   |           |           |          |              |
| 299 -> 318         | -0.11885  |           |           |          |              |
| 300 -> 318         | 0.12598   |           |           |          |              |
| 302 -> 324         | 0.18605   |           |           |          |              |
| 303 -> 324         | 0.13449   |           |           |          |              |
| 307 -> 327         | 0.36278   |           |           |          |              |
| 308 -> 327         | -0.13208  |           |           |          |              |
| 309 -> 342         | 0.19366   |           |           |          |              |
| 309 -> 344         | -0.16551  |           |           |          |              |
| Excited State 227: | Singlet-A | 5.2619 eV | 235.63 nm | f=0.0292 | <S**2>=0.000 |
| 280 -> 311         | -0.15904  |           |           |          |              |
| 281 -> 311         | -0.10290  |           |           |          |              |
| 290 -> 313         | 0.18490   |           |           |          |              |
| 291 -> 312         | 0.15082   |           |           |          |              |
| 291 -> 313         | -0.11323  |           |           |          |              |
| 291 -> 314         | 0.44635   |           |           |          |              |
| 292 -> 314         | -0.19522  |           |           |          |              |
| 302 -> 323         | -0.14470  |           |           |          |              |
| 305 -> 325         | -0.13671  |           |           |          |              |
| Excited State 228: | Singlet-A | 5.2654 eV | 235.47 nm | f=0.0329 | <S**2>=0.000 |
| 280 -> 311         | 0.11858   |           |           |          |              |
| 291 -> 314         | 0.15082   |           |           |          |              |
| 294 -> 315         | 0.16540   |           |           |          |              |
| 300 -> 324         | 0.15278   |           |           |          |              |
| 302 -> 323         | 0.29817   |           |           |          |              |
| 302 -> 324         | -0.29343  |           |           |          |              |
| 307 -> 327         | 0.25696   |           |           |          |              |
| 308 -> 327         | -0.13590  |           |           |          |              |
| Excited State 252: | Singlet-A | 5.4361 eV | 228.08 nm | f=0.0208 | <S**2>=0.000 |
| 294 -> 315         | 0.19109   |           |           |          |              |
| 294 -> 316         | 0.44554   |           |           |          |              |
| 299 -> 319         | 0.20506   |           |           |          |              |
| 299 -> 320         | -0.23995  |           |           |          |              |
| 299 -> 321         | 0.21375   |           |           |          |              |
| 300 -> 323         | 0.13456   |           |           |          |              |
| 308 -> 332         | -0.11122  |           |           |          |              |
| Excited State 272: | Singlet-A | 5.5499 eV | 223.40 nm | f=0.0323 | <S**2>=0.000 |
| 278 -> 312         | 0.30628   |           |           |          |              |
| 287 -> 313         | 0.25962   |           |           |          |              |
| 293 -> 316         | 0.30913   |           |           |          |              |
| 295 -> 315         | 0.11066   |           |           |          |              |
| 307 -> 329         | -0.19617  |           |           |          |              |
| 307 -> 332         | -0.13027  |           |           |          |              |
| 309 -> 346         | 0.11551   |           |           |          |              |
| 309 -> 347         | -0.11005  |           |           |          |              |

|                    |           |           |           |          |              |
|--------------------|-----------|-----------|-----------|----------|--------------|
| Excited State 290: | Singlet-A | 5.6173 eV | 220.72 nm | f=0.0280 | <S**2>=0.000 |
| 278 -> 312         | -0.11628  |           |           |          |              |
| 295 -> 317         | 0.59242   |           |           |          |              |
| 304 -> 327         | -0.10617  |           |           |          |              |
| Excited State 310: | Singlet-A | 5.6808 eV | 218.25 nm | f=0.0351 | <S**2>=0.000 |
| 282 -> 313         | 0.24882   |           |           |          |              |
| 283 -> 313         | 0.38934   |           |           |          |              |
| 283 -> 314         | 0.16840   |           |           |          |              |
| 287 -> 314         | -0.22639  |           |           |          |              |
| 290 -> 315         | -0.10870  |           |           |          |              |
| 305 -> 329         | 0.12358   |           |           |          |              |
| 306 -> 329         | -0.18086  |           |           |          |              |
| Excited State 317: | Singlet-A | 5.7231 eV | 216.64 nm | f=0.0283 | <S**2>=0.000 |
| 276 -> 311         | 0.40307   |           |           |          |              |
| 279 -> 311         | -0.11667  |           |           |          |              |
| 290 -> 316         | 0.14080   |           |           |          |              |
| 291 -> 316         | -0.20227  |           |           |          |              |
| 297 -> 318         | -0.19158  |           |           |          |              |
| 297 -> 319         | -0.14373  |           |           |          |              |
| 297 -> 320         | 0.19384   |           |           |          |              |
| 297 -> 321         | -0.16780  |           |           |          |              |
| Excited State 406: | Singlet-A | 6.0611 eV | 204.56 nm | f=0.0252 | <S**2>=0.000 |
| 273 -> 311         | -0.17911  |           |           |          |              |
| 277 -> 313         | 0.10261   |           |           |          |              |
| 279 -> 314         | -0.14796  |           |           |          |              |
| 281 -> 314         | 0.17913   |           |           |          |              |
| 287 -> 315         | -0.15965  |           |           |          |              |
| 288 -> 315         | -0.11093  |           |           |          |              |
| 288 -> 316         | -0.10207  |           |           |          |              |
| 291 -> 316         | -0.11268  |           |           |          |              |
| 292 -> 316         | -0.20044  |           |           |          |              |
| 294 -> 319         | 0.10397   |           |           |          |              |
| 294 -> 320         | -0.13764  |           |           |          |              |
| 294 -> 321         | 0.10865   |           |           |          |              |
| 294 -> 324         | 0.17217   |           |           |          |              |
| 296 -> 325         | -0.10059  |           |           |          |              |
| 297 -> 325         | -0.13330  |           |           |          |              |
| 308 -> 335         | 0.22693   |           |           |          |              |
| Excited State 415: | Singlet-A | 6.0928 eV | 203.49 nm | f=0.0287 | <S**2>=0.000 |
| 272 -> 311         | -0.10401  |           |           |          |              |
| 273 -> 311         | 0.15086   |           |           |          |              |
| 279 -> 312         | -0.13245  |           |           |          |              |
| 279 -> 314         | -0.15004  |           |           |          |              |
| 281 -> 314         | -0.13889  |           |           |          |              |
| 285 -> 313         | 0.13341   |           |           |          |              |
| 288 -> 316         | -0.12279  |           |           |          |              |
| 294 -> 318         | -0.11996  |           |           |          |              |
| 294 -> 324         | -0.10716  |           |           |          |              |
| 302 -> 329         | 0.10601   |           |           |          |              |
| 302 -> 332         | -0.10786  |           |           |          |              |

|            |         |
|------------|---------|
| 304 -> 329 | 0.12345 |
| 307 -> 335 | 0.15032 |
| 308 -> 335 | 0.35639 |

---

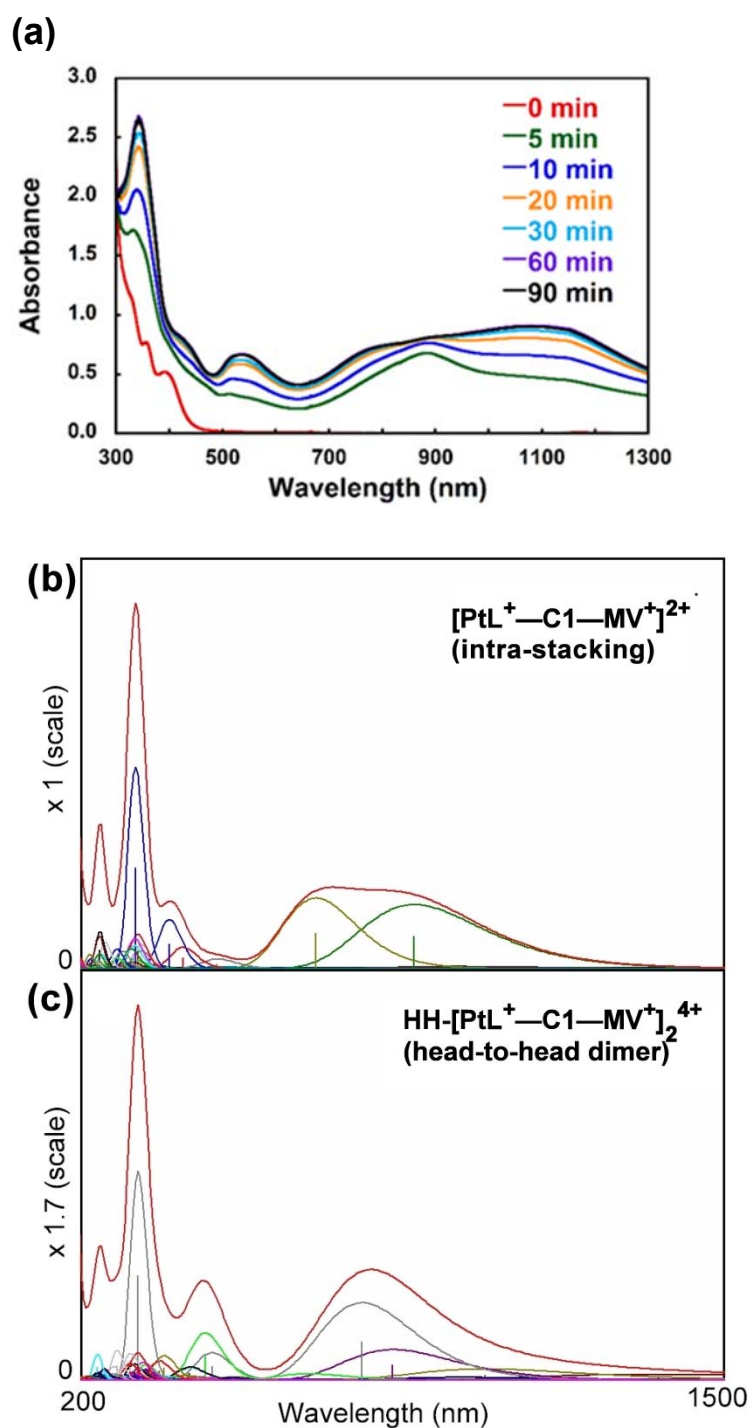

**Figure S12.** Spectral changes during 90-min irradiation of an aqueous acetate buffer solution (0.1 M, pH = 5.0, 20 °C under Ar atmosphere) containing 30 mM EDTA, 0.1 mM  $\text{PtL}^{2+}\text{-C1-MV}^{2+}$ , and 0.1 M NaCl (a, Figure 3 in MS). Spectral features simulated for two relevant reduced species (b) and (c).



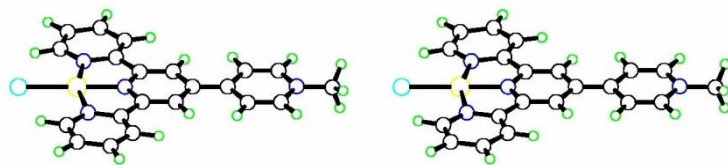

PtL•

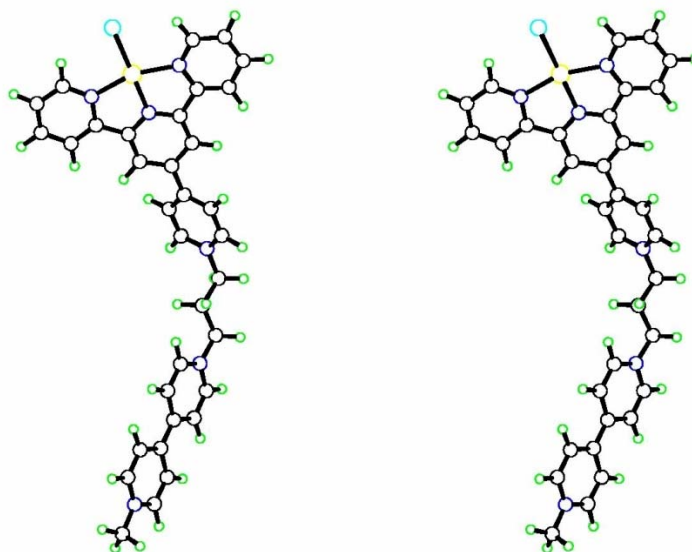

$[PtL^{2+}-C1-MV^{+\bullet}]^{3+}$

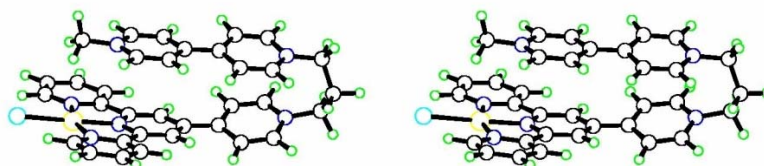

$[PtL^{1.5+}-C1-MV^{1.5+}]^{3+}$

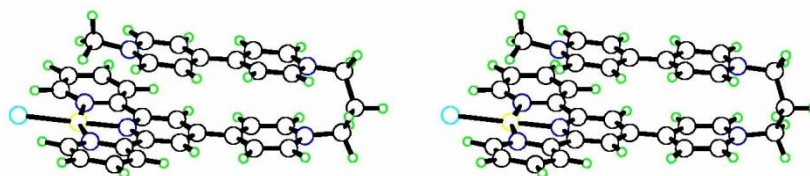

$[PtL^{+\bullet}-C1-MV^{+\bullet}]^{2+}$

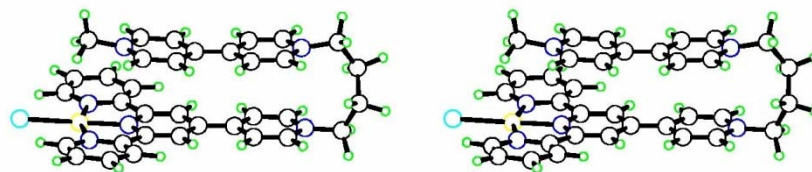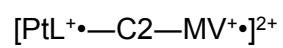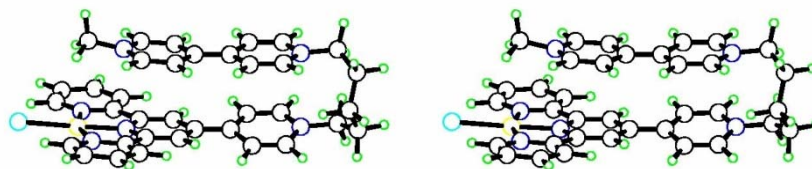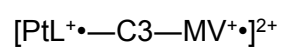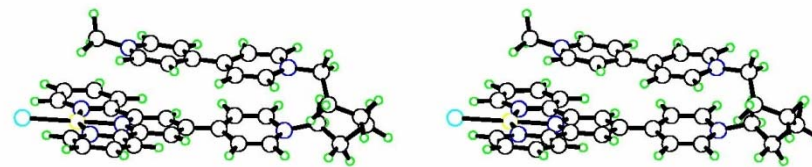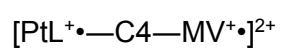

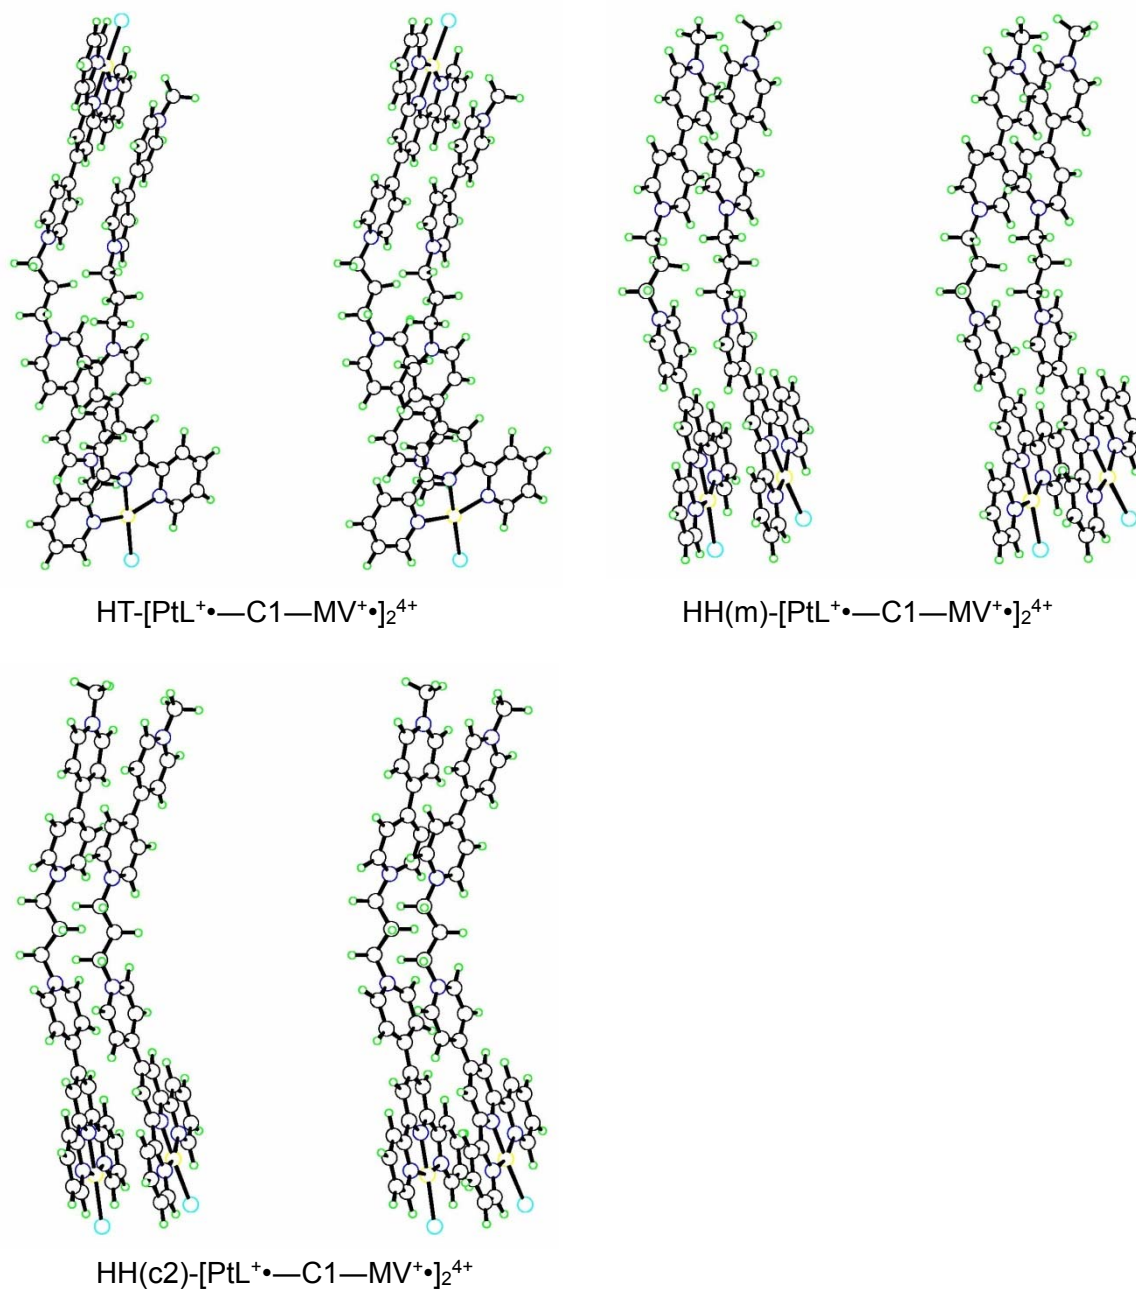

**Figure S13.** Electronic transitions computed by TD-DFT for the closed-shell singlet state of [PtL<sup>+</sup>-C1-MV<sup>+</sup>]<sub>2</sub><sup>2+</sup>, for which part of the Gaussian output is shown. Relevant MO's are shown below
